# Supplementary material for: Artificial intelligence for dementia—Applied models and digital health
Source: PubMed Central journal article supplement (PMC10955778; doi:10.1002/alz.13391), 2023-07-26
Supplement: ALZ-19-5872-s001.pdf [file ALZ-19-5872-s001.pdf]

# ICMJE DISCLOSURE FORM

**Date:** 4/12/2023

**Your Name:** Donald Lyall

**Manuscript Title:** Artificial Intelligence for Dementia - Applied Models and Digital Health.

**Manuscript Number (if known):** [Click or tap here to enter text.](#)

In the interest of transparency, we ask you to disclose all relationships/activities/interests listed below that are related to the content of your manuscript. “Related” means any relation with for-profit or not-for-profit third parties whose interests may be affected by the content of the manuscript. Disclosure represents a commitment to transparency and does not necessarily indicate a bias. If you are in doubt about whether to list a relationship/activity/interest, it is preferable that you do so.

The author’s relationships/activities/interests should be defined broadly. For example, if your manuscript pertains to the epidemiology of hypertension, you should declare all relationships with manufacturers of antihypertensive medication, even if that medication is not mentioned in the manuscript.

In item #1 below, report all support for the work reported in this manuscript without time limit. For all other items, the time frame for disclosure is the past 36 months.

|                                                           |                                                                                                                                                                                | Name all entities with whom you have this relationship or indicate none (add rows as needed) | Specifications/Comments (e.g., if payments were made to you or to your institution) |
|-----------------------------------------------------------|--------------------------------------------------------------------------------------------------------------------------------------------------------------------------------|----------------------------------------------------------------------------------------------|-------------------------------------------------------------------------------------|
| <b>Time frame: Since the initial planning of the work</b> |                                                                                                                                                                                |                                                                                              |                                                                                     |
| <b>1</b>                                                  | All support for the present manuscript (e.g., funding, provision of study materials, medical writing, article processing charges, etc.)<br><b>No time limit for this item.</b> | <input checked="" type="checkbox"/> <b>None</b>                                              |                                                                                     |
|                                                           |                                                                                                                                                                                |                                                                                              | <small>Click the tab key to add additional rows.</small>                            |
| <b>Time frame: past 36 months</b>                         |                                                                                                                                                                                |                                                                                              |                                                                                     |
| <b>2</b>                                                  | Grants or contracts from any entity (if not indicated in item #1 above).                                                                                                       | <input checked="" type="checkbox"/> <b>None</b>                                              |                                                                                     |
|                                                           |                                                                                                                                                                                |                                                                                              |                                                                                     |
| <b>3</b>                                                  | Royalties or licenses                                                                                                                                                          | <input checked="" type="checkbox"/> <b>None</b>                                              |                                                                                     |
|                                                           |                                                                                                                                                                                |                                                                                              |                                                                                     |

|    |                                                                                                              | Name all entities with whom you have this relationship or indicate none (add rows as needed) | Specifications/Comments (e.g., if payments were made to you or to your institution) |
|----|--------------------------------------------------------------------------------------------------------------|----------------------------------------------------------------------------------------------|-------------------------------------------------------------------------------------|
| 4  | Consulting fees                                                                                              | <input checked="" type="checkbox"/> None                                                     |                                                                                     |
|    |                                                                                                              |                                                                                              |                                                                                     |
|    |                                                                                                              |                                                                                              |                                                                                     |
|    |                                                                                                              |                                                                                              |                                                                                     |
| 5  | Payment or honoraria for lectures, presentations, speakers bureaus, manuscript writing or educational events | <input checked="" type="checkbox"/> None                                                     |                                                                                     |
|    |                                                                                                              |                                                                                              |                                                                                     |
|    |                                                                                                              |                                                                                              |                                                                                     |
|    |                                                                                                              |                                                                                              |                                                                                     |
| 6  | Payment for expert testimony                                                                                 | <input checked="" type="checkbox"/> None                                                     |                                                                                     |
|    |                                                                                                              |                                                                                              |                                                                                     |
|    |                                                                                                              |                                                                                              |                                                                                     |
|    |                                                                                                              |                                                                                              |                                                                                     |
| 7  | Support for attending meetings and/or travel                                                                 | <input checked="" type="checkbox"/> None                                                     |                                                                                     |
|    |                                                                                                              |                                                                                              |                                                                                     |
|    |                                                                                                              |                                                                                              |                                                                                     |
|    |                                                                                                              |                                                                                              |                                                                                     |
| 8  | Patents planned, issued or pending                                                                           | <input checked="" type="checkbox"/> None                                                     |                                                                                     |
|    |                                                                                                              |                                                                                              |                                                                                     |
|    |                                                                                                              |                                                                                              |                                                                                     |
|    |                                                                                                              |                                                                                              |                                                                                     |
| 9  | Participation on a Data Safety Monitoring Board or Advisory Board                                            | <input checked="" type="checkbox"/> None                                                     |                                                                                     |
|    |                                                                                                              |                                                                                              |                                                                                     |
|    |                                                                                                              |                                                                                              |                                                                                     |
|    |                                                                                                              |                                                                                              |                                                                                     |
| 10 | Leadership or fiduciary role in other board, society, committee or advocacy group, paid or unpaid            | <input checked="" type="checkbox"/> None                                                     |                                                                                     |
|    |                                                                                                              |                                                                                              |                                                                                     |
|    |                                                                                                              |                                                                                              |                                                                                     |
|    |                                                                                                              |                                                                                              |                                                                                     |
| 11 | Stock or stock options                                                                                       | <input checked="" type="checkbox"/> None                                                     |                                                                                     |
|    |                                                                                                              |                                                                                              |                                                                                     |
|    |                                                                                                              |                                                                                              |                                                                                     |
|    |                                                                                                              |                                                                                              |                                                                                     |

|           |                                                                                  | <b>Name all entities with whom you have this relationship or indicate none (add rows as needed)</b> | <b>Specifications/Comments (e.g., if payments were made to you or to your institution)</b> |
|-----------|----------------------------------------------------------------------------------|-----------------------------------------------------------------------------------------------------|--------------------------------------------------------------------------------------------|
| <b>12</b> | Receipt of equipment, materials, drugs, medical writing, gifts or other services | <input checked="" type="checkbox"/> <b>None</b>                                                     |                                                                                            |
|           |                                                                                  |                                                                                                     |                                                                                            |
|           |                                                                                  |                                                                                                     |                                                                                            |
| <b>13</b> | Other financial or non-financial interests                                       | <input checked="" type="checkbox"/> <b>None</b>                                                     |                                                                                            |
|           |                                                                                  |                                                                                                     |                                                                                            |
|           |                                                                                  |                                                                                                     |                                                                                            |
|           |                                                                                  |                                                                                                     |                                                                                            |

**Please place an “X” next to the following statement to indicate your agreement:**

I certify that I have answered every question and have not altered the wording of any of the questions on this form.

# ICMJE DISCLOSURE FORM

**Date:** 4/12/2023

**Your Name:** Ilianna Lourida

**Manuscript Title:** Artificial Intelligence for Dementia - Applied Models and Digital Health.

**Manuscript Number (if known):** Click or tap here to enter text.

In the interest of transparency, we ask you to disclose all relationships/activities/interests listed below that are related to the content of your manuscript. “Related” means any relation with for-profit or not-for-profit third parties whose interests may be affected by the content of the manuscript. Disclosure represents a commitment to transparency and does not necessarily indicate a bias. If you are in doubt about whether to list a relationship/activity/interest, it is preferable that you do so.

The author’s relationships/activities/interests should be defined broadly. For example, if your manuscript pertains to the epidemiology of hypertension, you should declare all relationships with manufacturers of antihypertensive medication, even if that medication is not mentioned in the manuscript.

In item #1 below, report all support for the work reported in this manuscript without time limit. For all other items, the time frame for disclosure is the past 36 months.

|                                                           |                                                                                                                                                                                | Name all entities with whom you have this relationship or indicate none (add rows as needed) | Specifications/Comments (e.g., if payments were made to you or to your institution) |
|-----------------------------------------------------------|--------------------------------------------------------------------------------------------------------------------------------------------------------------------------------|----------------------------------------------------------------------------------------------|-------------------------------------------------------------------------------------|
| <b>Time frame: Since the initial planning of the work</b> |                                                                                                                                                                                |                                                                                              |                                                                                     |
| <b>1</b>                                                  | All support for the present manuscript (e.g., funding, provision of study materials, medical writing, article processing charges, etc.)<br><b>No time limit for this item.</b> | <input checked="" type="checkbox"/> <b>None</b>                                              |                                                                                     |
|                                                           |                                                                                                                                                                                |                                                                                              | Click the tab key to add additional rows.                                           |
| <b>Time frame: past 36 months</b>                         |                                                                                                                                                                                |                                                                                              |                                                                                     |
| <b>2</b>                                                  | Grants or contracts from any entity (if not indicated in item #1 above).                                                                                                       | <input checked="" type="checkbox"/> <b>None</b>                                              |                                                                                     |
|                                                           |                                                                                                                                                                                |                                                                                              |                                                                                     |
| <b>3</b>                                                  | Royalties or licenses                                                                                                                                                          | <input checked="" type="checkbox"/> <b>None</b>                                              |                                                                                     |
|                                                           |                                                                                                                                                                                |                                                                                              |                                                                                     |

|    |                                                                                                              | Name all entities with whom you have this relationship or indicate none (add rows as needed)                                                                                                                                                                                                                         | Specifications/Comments (e.g., if payments were made to you or to your institution) |  |  |  |  |  |  |
|----|--------------------------------------------------------------------------------------------------------------|----------------------------------------------------------------------------------------------------------------------------------------------------------------------------------------------------------------------------------------------------------------------------------------------------------------------|-------------------------------------------------------------------------------------|--|--|--|--|--|--|
| 4  | Consulting fees                                                                                              | <input checked="" type="checkbox"/> <b>None</b><br><table border="1" style="width: 100%; border-collapse: collapse;"> <tr><td style="width: 50%; height: 20px;"></td><td style="width: 50%;"></td></tr> <tr><td style="height: 20px;"></td><td></td></tr> <tr><td style="height: 20px;"></td><td></td></tr> </table> |                                                                                     |  |  |  |  |  |  |
|    |                                                                                                              |                                                                                                                                                                                                                                                                                                                      |                                                                                     |  |  |  |  |  |  |
|    |                                                                                                              |                                                                                                                                                                                                                                                                                                                      |                                                                                     |  |  |  |  |  |  |
|    |                                                                                                              |                                                                                                                                                                                                                                                                                                                      |                                                                                     |  |  |  |  |  |  |
| 5  | Payment or honoraria for lectures, presentations, speakers bureaus, manuscript writing or educational events | <input checked="" type="checkbox"/> <b>None</b><br><table border="1" style="width: 100%; border-collapse: collapse;"> <tr><td style="width: 50%; height: 20px;"></td><td style="width: 50%;"></td></tr> <tr><td style="height: 20px;"></td><td></td></tr> <tr><td style="height: 20px;"></td><td></td></tr> </table> |                                                                                     |  |  |  |  |  |  |
|    |                                                                                                              |                                                                                                                                                                                                                                                                                                                      |                                                                                     |  |  |  |  |  |  |
|    |                                                                                                              |                                                                                                                                                                                                                                                                                                                      |                                                                                     |  |  |  |  |  |  |
|    |                                                                                                              |                                                                                                                                                                                                                                                                                                                      |                                                                                     |  |  |  |  |  |  |
| 6  | Payment for expert testimony                                                                                 | <input checked="" type="checkbox"/> <b>None</b><br><table border="1" style="width: 100%; border-collapse: collapse;"> <tr><td style="width: 50%; height: 20px;"></td><td style="width: 50%;"></td></tr> <tr><td style="height: 20px;"></td><td></td></tr> <tr><td style="height: 20px;"></td><td></td></tr> </table> |                                                                                     |  |  |  |  |  |  |
|    |                                                                                                              |                                                                                                                                                                                                                                                                                                                      |                                                                                     |  |  |  |  |  |  |
|    |                                                                                                              |                                                                                                                                                                                                                                                                                                                      |                                                                                     |  |  |  |  |  |  |
|    |                                                                                                              |                                                                                                                                                                                                                                                                                                                      |                                                                                     |  |  |  |  |  |  |
| 7  | Support for attending meetings and/or travel                                                                 | <input checked="" type="checkbox"/> <b>None</b><br><table border="1" style="width: 100%; border-collapse: collapse;"> <tr><td style="width: 50%; height: 20px;"></td><td style="width: 50%;"></td></tr> <tr><td style="height: 20px;"></td><td></td></tr> <tr><td style="height: 20px;"></td><td></td></tr> </table> |                                                                                     |  |  |  |  |  |  |
|    |                                                                                                              |                                                                                                                                                                                                                                                                                                                      |                                                                                     |  |  |  |  |  |  |
|    |                                                                                                              |                                                                                                                                                                                                                                                                                                                      |                                                                                     |  |  |  |  |  |  |
|    |                                                                                                              |                                                                                                                                                                                                                                                                                                                      |                                                                                     |  |  |  |  |  |  |
| 8  | Patents planned, issued or pending                                                                           | <input checked="" type="checkbox"/> <b>None</b><br><table border="1" style="width: 100%; border-collapse: collapse;"> <tr><td style="width: 50%; height: 20px;"></td><td style="width: 50%;"></td></tr> <tr><td style="height: 20px;"></td><td></td></tr> <tr><td style="height: 20px;"></td><td></td></tr> </table> |                                                                                     |  |  |  |  |  |  |
|    |                                                                                                              |                                                                                                                                                                                                                                                                                                                      |                                                                                     |  |  |  |  |  |  |
|    |                                                                                                              |                                                                                                                                                                                                                                                                                                                      |                                                                                     |  |  |  |  |  |  |
|    |                                                                                                              |                                                                                                                                                                                                                                                                                                                      |                                                                                     |  |  |  |  |  |  |
| 9  | Participation on a Data Safety Monitoring Board or Advisory Board                                            | <input checked="" type="checkbox"/> <b>None</b><br><table border="1" style="width: 100%; border-collapse: collapse;"> <tr><td style="width: 50%; height: 20px;"></td><td style="width: 50%;"></td></tr> <tr><td style="height: 20px;"></td><td></td></tr> <tr><td style="height: 20px;"></td><td></td></tr> </table> |                                                                                     |  |  |  |  |  |  |
|    |                                                                                                              |                                                                                                                                                                                                                                                                                                                      |                                                                                     |  |  |  |  |  |  |
|    |                                                                                                              |                                                                                                                                                                                                                                                                                                                      |                                                                                     |  |  |  |  |  |  |
|    |                                                                                                              |                                                                                                                                                                                                                                                                                                                      |                                                                                     |  |  |  |  |  |  |
| 10 | Leadership or fiduciary role in other board, society, committee or advocacy group, paid or unpaid            | <input checked="" type="checkbox"/> <b>None</b><br><table border="1" style="width: 100%; border-collapse: collapse;"> <tr><td style="width: 50%; height: 20px;"></td><td style="width: 50%;"></td></tr> <tr><td style="height: 20px;"></td><td></td></tr> <tr><td style="height: 20px;"></td><td></td></tr> </table> |                                                                                     |  |  |  |  |  |  |
|    |                                                                                                              |                                                                                                                                                                                                                                                                                                                      |                                                                                     |  |  |  |  |  |  |
|    |                                                                                                              |                                                                                                                                                                                                                                                                                                                      |                                                                                     |  |  |  |  |  |  |
|    |                                                                                                              |                                                                                                                                                                                                                                                                                                                      |                                                                                     |  |  |  |  |  |  |

|           |                                                                                  | Name all entities with whom you have this relationship or indicate none (add rows as needed)                                                                                                                                                                                                                         | Specifications/Comments (e.g., if payments were made to you or to your institution) |  |  |  |  |  |  |
|-----------|----------------------------------------------------------------------------------|----------------------------------------------------------------------------------------------------------------------------------------------------------------------------------------------------------------------------------------------------------------------------------------------------------------------|-------------------------------------------------------------------------------------|--|--|--|--|--|--|
| <b>11</b> | Stock or stock options                                                           | <input checked="" type="checkbox"/> <b>None</b><br><table border="1" style="width: 100%; border-collapse: collapse;"> <tr><td style="width: 50%; height: 15px;"></td><td style="width: 50%;"></td></tr> <tr><td style="height: 15px;"></td><td></td></tr> <tr><td style="height: 15px;"></td><td></td></tr> </table> |                                                                                     |  |  |  |  |  |  |
|           |                                                                                  |                                                                                                                                                                                                                                                                                                                      |                                                                                     |  |  |  |  |  |  |
|           |                                                                                  |                                                                                                                                                                                                                                                                                                                      |                                                                                     |  |  |  |  |  |  |
|           |                                                                                  |                                                                                                                                                                                                                                                                                                                      |                                                                                     |  |  |  |  |  |  |
| <b>12</b> | Receipt of equipment, materials, drugs, medical writing, gifts or other services | <input checked="" type="checkbox"/> <b>None</b><br><table border="1" style="width: 100%; border-collapse: collapse;"> <tr><td style="width: 50%; height: 15px;"></td><td style="width: 50%;"></td></tr> <tr><td style="height: 15px;"></td><td></td></tr> <tr><td style="height: 15px;"></td><td></td></tr> </table> |                                                                                     |  |  |  |  |  |  |
|           |                                                                                  |                                                                                                                                                                                                                                                                                                                      |                                                                                     |  |  |  |  |  |  |
|           |                                                                                  |                                                                                                                                                                                                                                                                                                                      |                                                                                     |  |  |  |  |  |  |
|           |                                                                                  |                                                                                                                                                                                                                                                                                                                      |                                                                                     |  |  |  |  |  |  |
| <b>13</b> | Other financial or non-financial interests                                       | <input checked="" type="checkbox"/> <b>None</b><br><table border="1" style="width: 100%; border-collapse: collapse;"> <tr><td style="width: 50%; height: 15px;"></td><td style="width: 50%;"></td></tr> <tr><td style="height: 15px;"></td><td></td></tr> <tr><td style="height: 15px;"></td><td></td></tr> </table> |                                                                                     |  |  |  |  |  |  |
|           |                                                                                  |                                                                                                                                                                                                                                                                                                                      |                                                                                     |  |  |  |  |  |  |
|           |                                                                                  |                                                                                                                                                                                                                                                                                                                      |                                                                                     |  |  |  |  |  |  |
|           |                                                                                  |                                                                                                                                                                                                                                                                                                                      |                                                                                     |  |  |  |  |  |  |

**Please place an “X” next to the following statement to indicate your agreement:**

I certify that I have answered every question and have not altered the wording of any of the questions on this form.

# ICMJE DISCLOSURE FORM

**Date:** 4/12/2023

**Your Name:** Andrey Kormilitzin

**Manuscript Title:** Artificial Intelligence for Dementia - Applied Models and Digital Health

**Manuscript Number (if known):** ADJ-D-22-01205

In the interest of transparency, we ask you to disclose all relationships/activities/interests listed below that are related to the content of your manuscript. "Related" means any relation with for-profit or not-for-profit third parties whose interests may be affected by the content of the manuscript. Disclosure represents a commitment to transparency and does not necessarily indicate a bias. If you are in doubt about whether to list a relationship/activity/interest, it is preferable that you do so.

The author's relationships/activities/interests should be defined broadly. For example, if your manuscript pertains to the epidemiology of hypertension, you should declare all relationships with manufacturers of antihypertensive medication, even if that medication is not mentioned in the manuscript.

In item #1 below, report all support for the work reported in this manuscript without time limit. For all other items, the time frame for disclosure is the past 36 months.

|                                                              |                                                                                                                                                                                | Name all entities with whom you have this relationship or indicate none (add rows as needed)                                                                                                                                                                                                                         | Specifications/Comments (e.g., if payments were made to you or to your institution) |                  |                                                              |                  |  |  |                                                                      |
|--------------------------------------------------------------|--------------------------------------------------------------------------------------------------------------------------------------------------------------------------------|----------------------------------------------------------------------------------------------------------------------------------------------------------------------------------------------------------------------------------------------------------------------------------------------------------------------|-------------------------------------------------------------------------------------|------------------|--------------------------------------------------------------|------------------|--|--|----------------------------------------------------------------------|
| <b>Time frame: Since the initial planning of the work</b>    |                                                                                                                                                                                |                                                                                                                                                                                                                                                                                                                      |                                                                                     |                  |                                                              |                  |  |  |                                                                      |
| <b>1</b>                                                     | All support for the present manuscript (e.g., funding, provision of study materials, medical writing, article processing charges, etc.)<br><b>No time limit for this item.</b> | <input checked="" type="checkbox"/> <b>None</b><br><table border="1" style="width: 100%; border-collapse: collapse;"> <tr><td> </td><td> </td></tr> <tr><td> </td><td> </td></tr> <tr><td> </td><td> </td></tr> </table>                                                                                             |                                                                                     |                  |                                                              |                  |  |  | <br><br><br><small>Click the tab key to add additional rows.</small> |
|                                                              |                                                                                                                                                                                |                                                                                                                                                                                                                                                                                                                      |                                                                                     |                  |                                                              |                  |  |  |                                                                      |
|                                                              |                                                                                                                                                                                |                                                                                                                                                                                                                                                                                                                      |                                                                                     |                  |                                                              |                  |  |  |                                                                      |
|                                                              |                                                                                                                                                                                |                                                                                                                                                                                                                                                                                                                      |                                                                                     |                  |                                                              |                  |  |  |                                                                      |
| <b>Time frame: past 36 months</b>                            |                                                                                                                                                                                |                                                                                                                                                                                                                                                                                                                      |                                                                                     |                  |                                                              |                  |  |  |                                                                      |
| <b>2</b>                                                     | Grants or contracts from any entity (if not indicated in item #1 above).                                                                                                       | <input type="checkbox"/> <b>None</b><br><table border="1" style="width: 100%; border-collapse: collapse;"> <tr><td>GlaxoSmithKline</td><td>Research funding</td></tr> <tr><td>The National Institute for Health and Care Research AI Award</td><td>Research funding</td></tr> <tr><td> </td><td> </td></tr> </table> | GlaxoSmithKline                                                                     | Research funding | The National Institute for Health and Care Research AI Award | Research funding |  |  |                                                                      |
| GlaxoSmithKline                                              | Research funding                                                                                                                                                               |                                                                                                                                                                                                                                                                                                                      |                                                                                     |                  |                                                              |                  |  |  |                                                                      |
| The National Institute for Health and Care Research AI Award | Research funding                                                                                                                                                               |                                                                                                                                                                                                                                                                                                                      |                                                                                     |                  |                                                              |                  |  |  |                                                                      |
|                                                              |                                                                                                                                                                                |                                                                                                                                                                                                                                                                                                                      |                                                                                     |                  |                                                              |                  |  |  |                                                                      |
| <b>3</b>                                                     | Royalties or licenses                                                                                                                                                          | <input checked="" type="checkbox"/> <b>None</b><br><table border="1" style="width: 100%; border-collapse: collapse;"> <tr><td> </td><td> </td></tr> <tr><td> </td><td> </td></tr> <tr><td> </td><td> </td></tr> </table>                                                                                             |                                                                                     |                  |                                                              |                  |  |  |                                                                      |
|                                                              |                                                                                                                                                                                |                                                                                                                                                                                                                                                                                                                      |                                                                                     |                  |                                                              |                  |  |  |                                                                      |
|                                                              |                                                                                                                                                                                |                                                                                                                                                                                                                                                                                                                      |                                                                                     |                  |                                                              |                  |  |  |                                                                      |
|                                                              |                                                                                                                                                                                |                                                                                                                                                                                                                                                                                                                      |                                                                                     |                  |                                                              |                  |  |  |                                                                      |

|                                   |                                                                                                              | Name all entities with whom you have this relationship or indicate none (add rows as needed)                                                                                                                                                                                                              | Specifications/Comments (e.g., if payments were made to you or to your institution) |                 |                                   |                    |  |  |  |
|-----------------------------------|--------------------------------------------------------------------------------------------------------------|-----------------------------------------------------------------------------------------------------------------------------------------------------------------------------------------------------------------------------------------------------------------------------------------------------------|-------------------------------------------------------------------------------------|-----------------|-----------------------------------|--------------------|--|--|--|
| 4                                 | Consulting fees                                                                                              | <input checked="" type="checkbox"/> <b>None</b><br><table border="1" style="width: 100%; border-collapse: collapse;"> <tr><td> </td><td> </td></tr> <tr><td> </td><td> </td></tr> <tr><td> </td><td> </td></tr> </table>                                                                                  |                                                                                     |                 |                                   |                    |  |  |  |
|                                   |                                                                                                              |                                                                                                                                                                                                                                                                                                           |                                                                                     |                 |                                   |                    |  |  |  |
|                                   |                                                                                                              |                                                                                                                                                                                                                                                                                                           |                                                                                     |                 |                                   |                    |  |  |  |
|                                   |                                                                                                              |                                                                                                                                                                                                                                                                                                           |                                                                                     |                 |                                   |                    |  |  |  |
| 5                                 | Payment or honoraria for lectures, presentations, speakers bureaus, manuscript writing or educational events | <input checked="" type="checkbox"/> <b>None</b><br><table border="1" style="width: 100%; border-collapse: collapse;"> <tr><td> </td><td> </td></tr> <tr><td> </td><td> </td></tr> <tr><td> </td><td> </td></tr> </table>                                                                                  |                                                                                     |                 |                                   |                    |  |  |  |
|                                   |                                                                                                              |                                                                                                                                                                                                                                                                                                           |                                                                                     |                 |                                   |                    |  |  |  |
|                                   |                                                                                                              |                                                                                                                                                                                                                                                                                                           |                                                                                     |                 |                                   |                    |  |  |  |
|                                   |                                                                                                              |                                                                                                                                                                                                                                                                                                           |                                                                                     |                 |                                   |                    |  |  |  |
| 6                                 | Payment for expert testimony                                                                                 | <input checked="" type="checkbox"/> <b>None</b><br><table border="1" style="width: 100%; border-collapse: collapse;"> <tr><td> </td><td> </td></tr> <tr><td> </td><td> </td></tr> <tr><td> </td><td> </td></tr> </table>                                                                                  |                                                                                     |                 |                                   |                    |  |  |  |
|                                   |                                                                                                              |                                                                                                                                                                                                                                                                                                           |                                                                                     |                 |                                   |                    |  |  |  |
|                                   |                                                                                                              |                                                                                                                                                                                                                                                                                                           |                                                                                     |                 |                                   |                    |  |  |  |
|                                   |                                                                                                              |                                                                                                                                                                                                                                                                                                           |                                                                                     |                 |                                   |                    |  |  |  |
| 7                                 | Support for attending meetings and/or travel                                                                 | <input checked="" type="checkbox"/> <b>None</b><br><table border="1" style="width: 100%; border-collapse: collapse;"> <tr><td> </td><td> </td></tr> <tr><td> </td><td> </td></tr> <tr><td> </td><td> </td></tr> </table>                                                                                  |                                                                                     |                 |                                   |                    |  |  |  |
|                                   |                                                                                                              |                                                                                                                                                                                                                                                                                                           |                                                                                     |                 |                                   |                    |  |  |  |
|                                   |                                                                                                              |                                                                                                                                                                                                                                                                                                           |                                                                                     |                 |                                   |                    |  |  |  |
|                                   |                                                                                                              |                                                                                                                                                                                                                                                                                                           |                                                                                     |                 |                                   |                    |  |  |  |
| 8                                 | Patents planned, issued or pending                                                                           | <input checked="" type="checkbox"/> <b>None</b><br><table border="1" style="width: 100%; border-collapse: collapse;"> <tr><td> </td><td> </td></tr> <tr><td> </td><td> </td></tr> <tr><td> </td><td> </td></tr> </table>                                                                                  |                                                                                     |                 |                                   |                    |  |  |  |
|                                   |                                                                                                              |                                                                                                                                                                                                                                                                                                           |                                                                                     |                 |                                   |                    |  |  |  |
|                                   |                                                                                                              |                                                                                                                                                                                                                                                                                                           |                                                                                     |                 |                                   |                    |  |  |  |
|                                   |                                                                                                              |                                                                                                                                                                                                                                                                                                           |                                                                                     |                 |                                   |                    |  |  |  |
| 9                                 | Participation on a Data Safety Monitoring Board or Advisory Board                                            | <input checked="" type="checkbox"/> <b>None</b><br><table border="1" style="width: 100%; border-collapse: collapse;"> <tr><td> </td><td> </td></tr> <tr><td> </td><td> </td></tr> <tr><td> </td><td> </td></tr> </table>                                                                                  |                                                                                     |                 |                                   |                    |  |  |  |
|                                   |                                                                                                              |                                                                                                                                                                                                                                                                                                           |                                                                                     |                 |                                   |                    |  |  |  |
|                                   |                                                                                                              |                                                                                                                                                                                                                                                                                                           |                                                                                     |                 |                                   |                    |  |  |  |
|                                   |                                                                                                              |                                                                                                                                                                                                                                                                                                           |                                                                                     |                 |                                   |                    |  |  |  |
| 10                                | Leadership or fiduciary role in other board, society, committee or advocacy group, paid or unpaid            | <input type="checkbox"/> <b>None</b><br><table border="1" style="width: 100%; border-collapse: collapse;"> <tr> <td>NeurIPS 2022 Workshop</td> <td>Programme Chair</td> </tr> <tr> <td>Deep Dementia Phenotyping Network</td> <td>Work group co-lead</td> </tr> <tr> <td> </td> <td> </td> </tr> </table> | NeurIPS 2022 Workshop                                                               | Programme Chair | Deep Dementia Phenotyping Network | Work group co-lead |  |  |  |
| NeurIPS 2022 Workshop             | Programme Chair                                                                                              |                                                                                                                                                                                                                                                                                                           |                                                                                     |                 |                                   |                    |  |  |  |
| Deep Dementia Phenotyping Network | Work group co-lead                                                                                           |                                                                                                                                                                                                                                                                                                           |                                                                                     |                 |                                   |                    |  |  |  |
|                                   |                                                                                                              |                                                                                                                                                                                                                                                                                                           |                                                                                     |                 |                                   |                    |  |  |  |

|                                                                                            | Name all entities with whom you have this relationship or indicate none (add rows as needed)                                                                                                          | Specifications/Comments (e.g., if payments were made to you or to your institution) |  |  |  |  |  |  |
|--------------------------------------------------------------------------------------------|-------------------------------------------------------------------------------------------------------------------------------------------------------------------------------------------------------|-------------------------------------------------------------------------------------|--|--|--|--|--|--|
| <b>11</b> Stock or stock options                                                           | <input checked="" type="checkbox"/> <b>None</b><br><table border="1" data-bbox="347 286 1484 383"> <tr><td> </td><td> </td></tr> <tr><td> </td><td> </td></tr> <tr><td> </td><td> </td></tr> </table> |                                                                                     |  |  |  |  |  |  |
|                                                                                            |                                                                                                                                                                                                       |                                                                                     |  |  |  |  |  |  |
|                                                                                            |                                                                                                                                                                                                       |                                                                                     |  |  |  |  |  |  |
|                                                                                            |                                                                                                                                                                                                       |                                                                                     |  |  |  |  |  |  |
| <b>12</b> Receipt of equipment, materials, drugs, medical writing, gifts or other services | <input checked="" type="checkbox"/> <b>None</b><br><table border="1" data-bbox="347 506 1484 602"> <tr><td> </td><td> </td></tr> <tr><td> </td><td> </td></tr> <tr><td> </td><td> </td></tr> </table> |                                                                                     |  |  |  |  |  |  |
|                                                                                            |                                                                                                                                                                                                       |                                                                                     |  |  |  |  |  |  |
|                                                                                            |                                                                                                                                                                                                       |                                                                                     |  |  |  |  |  |  |
|                                                                                            |                                                                                                                                                                                                       |                                                                                     |  |  |  |  |  |  |
| <b>13</b> Other financial or non-financial interests                                       | <input checked="" type="checkbox"/> <b>None</b><br><table border="1" data-bbox="347 786 1484 882"> <tr><td> </td><td> </td></tr> <tr><td> </td><td> </td></tr> <tr><td> </td><td> </td></tr> </table> |                                                                                     |  |  |  |  |  |  |
|                                                                                            |                                                                                                                                                                                                       |                                                                                     |  |  |  |  |  |  |
|                                                                                            |                                                                                                                                                                                                       |                                                                                     |  |  |  |  |  |  |
|                                                                                            |                                                                                                                                                                                                       |                                                                                     |  |  |  |  |  |  |

**Please place an “X” next to the following statement to indicate your agreement:**

I certify that I have answered every question and have not altered the wording of any of the questions on this form.

# ICMJE DISCLOSURE FORM

**Date:** 8/26/2021

**Your Name:** Riona Mc Ardle

**Manuscript Title:** Click or tap here to enter text.

**Manuscript Number (if known):** Click or tap here to enter text.

In the interest of transparency, we ask you to disclose all relationships/activities/interests listed below that are related to the content of your manuscript. “Related” means any relation with for-profit or not-for-profit third parties whose interests may be affected by the content of the manuscript. Disclosure represents a commitment to transparency and does not necessarily indicate a bias. If you are in doubt about whether to list a relationship/activity/interest, it is preferable that you do so.

The author’s relationships/activities/interests should be defined broadly. For example, if your manuscript pertains to the epidemiology of hypertension, you should declare all relationships with manufacturers of antihypertensive medication, even if that medication is not mentioned in the manuscript.

In item #1 below, report all support for the work reported in this manuscript without time limit. For all other items, the time frame for disclosure is the past 36 months.

|                                                           |                                                                                                                                                                                | Name all entities with whom you have this relationship or indicate none (add rows as needed) | Specifications/Comments (e.g., if payments were made to you or to your institution) |
|-----------------------------------------------------------|--------------------------------------------------------------------------------------------------------------------------------------------------------------------------------|----------------------------------------------------------------------------------------------|-------------------------------------------------------------------------------------|
| <b>Time frame: Since the initial planning of the work</b> |                                                                                                                                                                                |                                                                                              |                                                                                     |
| <b>1</b>                                                  | All support for the present manuscript (e.g., funding, provision of study materials, medical writing, article processing charges, etc.)<br><b>No time limit for this item.</b> | <input checked="" type="checkbox"/> <b>None</b>                                              |                                                                                     |
|                                                           |                                                                                                                                                                                |                                                                                              | Click the tab key to add additional rows.                                           |
| <b>Time frame: past 36 months</b>                         |                                                                                                                                                                                |                                                                                              |                                                                                     |
| <b>2</b>                                                  | Grants or contracts from any entity (if not indicated in item #1 above).                                                                                                       | <input type="checkbox"/> <b>None</b>                                                         |                                                                                     |
|                                                           |                                                                                                                                                                                | NIHR Advanced Fellowship.                                                                    |                                                                                     |
|                                                           |                                                                                                                                                                                |                                                                                              |                                                                                     |
| <b>3</b>                                                  | Royalties or licenses                                                                                                                                                          | <input checked="" type="checkbox"/> <b>None</b>                                              |                                                                                     |
|                                                           |                                                                                                                                                                                |                                                                                              |                                                                                     |
|                                                           |                                                                                                                                                                                |                                                                                              |                                                                                     |

|                     |                                                                                                              | Name all entities with whom you have this relationship or indicate none (add rows as needed)                                                                                                      | Specifications/Comments (e.g., if payments were made to you or to your institution) |  |  |  |  |  |  |
|---------------------|--------------------------------------------------------------------------------------------------------------|---------------------------------------------------------------------------------------------------------------------------------------------------------------------------------------------------|-------------------------------------------------------------------------------------|--|--|--|--|--|--|
| 4                   | Consulting fees                                                                                              | <input checked="" type="checkbox"/> <b>None</b><br><table border="1" data-bbox="347 282 1484 416"> <tr><td></td><td></td></tr> <tr><td></td><td></td></tr> <tr><td></td><td></td></tr> </table>   |                                                                                     |  |  |  |  |  |  |
|                     |                                                                                                              |                                                                                                                                                                                                   |                                                                                     |  |  |  |  |  |  |
|                     |                                                                                                              |                                                                                                                                                                                                   |                                                                                     |  |  |  |  |  |  |
|                     |                                                                                                              |                                                                                                                                                                                                   |                                                                                     |  |  |  |  |  |  |
| 5                   | Payment or honoraria for lectures, presentations, speakers bureaus, manuscript writing or educational events | <input checked="" type="checkbox"/> <b>None</b><br><table border="1" data-bbox="347 501 1484 600"> <tr><td></td><td></td></tr> <tr><td></td><td></td></tr> <tr><td></td><td></td></tr> </table>   |                                                                                     |  |  |  |  |  |  |
|                     |                                                                                                              |                                                                                                                                                                                                   |                                                                                     |  |  |  |  |  |  |
|                     |                                                                                                              |                                                                                                                                                                                                   |                                                                                     |  |  |  |  |  |  |
|                     |                                                                                                              |                                                                                                                                                                                                   |                                                                                     |  |  |  |  |  |  |
| 6                   | Payment for expert testimony                                                                                 | <input checked="" type="checkbox"/> <b>None</b><br><table border="1" data-bbox="347 848 1484 947"> <tr><td></td><td></td></tr> <tr><td></td><td></td></tr> <tr><td></td><td></td></tr> </table>   |                                                                                     |  |  |  |  |  |  |
|                     |                                                                                                              |                                                                                                                                                                                                   |                                                                                     |  |  |  |  |  |  |
|                     |                                                                                                              |                                                                                                                                                                                                   |                                                                                     |  |  |  |  |  |  |
|                     |                                                                                                              |                                                                                                                                                                                                   |                                                                                     |  |  |  |  |  |  |
| 7                   | Support for attending meetings and/or travel                                                                 | <table border="1" data-bbox="347 1032 1484 1131"> <tr><td>Wellcome Trust ISSF</td><td></td></tr> <tr><td></td><td></td></tr> <tr><td></td><td></td></tr> </table>                                 | Wellcome Trust ISSF                                                                 |  |  |  |  |  |  |
| Wellcome Trust ISSF |                                                                                                              |                                                                                                                                                                                                   |                                                                                     |  |  |  |  |  |  |
|                     |                                                                                                              |                                                                                                                                                                                                   |                                                                                     |  |  |  |  |  |  |
|                     |                                                                                                              |                                                                                                                                                                                                   |                                                                                     |  |  |  |  |  |  |
| 8                   | Patents planned, issued or pending                                                                           | <input checked="" type="checkbox"/> <b>None</b><br><table border="1" data-bbox="347 1283 1484 1382"> <tr><td></td><td></td></tr> <tr><td></td><td></td></tr> <tr><td></td><td></td></tr> </table> |                                                                                     |  |  |  |  |  |  |
|                     |                                                                                                              |                                                                                                                                                                                                   |                                                                                     |  |  |  |  |  |  |
|                     |                                                                                                              |                                                                                                                                                                                                   |                                                                                     |  |  |  |  |  |  |
|                     |                                                                                                              |                                                                                                                                                                                                   |                                                                                     |  |  |  |  |  |  |
| 9                   | Participation on a Data Safety Monitoring Board or Advisory Board                                            | <input checked="" type="checkbox"/> <b>None</b><br><table border="1" data-bbox="347 1503 1484 1601"> <tr><td></td><td></td></tr> <tr><td></td><td></td></tr> <tr><td></td><td></td></tr> </table> |                                                                                     |  |  |  |  |  |  |
|                     |                                                                                                              |                                                                                                                                                                                                   |                                                                                     |  |  |  |  |  |  |
|                     |                                                                                                              |                                                                                                                                                                                                   |                                                                                     |  |  |  |  |  |  |
|                     |                                                                                                              |                                                                                                                                                                                                   |                                                                                     |  |  |  |  |  |  |
| 10                  | Leadership or fiduciary role in other board, society, committee or advocacy group, paid or unpaid            | <input checked="" type="checkbox"/> <b>None</b><br><table border="1" data-bbox="347 1749 1484 1848"> <tr><td></td><td></td></tr> <tr><td></td><td></td></tr> <tr><td></td><td></td></tr> </table> |                                                                                     |  |  |  |  |  |  |
|                     |                                                                                                              |                                                                                                                                                                                                   |                                                                                     |  |  |  |  |  |  |
|                     |                                                                                                              |                                                                                                                                                                                                   |                                                                                     |  |  |  |  |  |  |
|                     |                                                                                                              |                                                                                                                                                                                                   |                                                                                     |  |  |  |  |  |  |

|                                                                                            | Name all entities with whom you have this relationship or indicate none (add rows as needed)                                                                                                          | Specifications/Comments (e.g., if payments were made to you or to your institution) |  |  |  |  |  |  |
|--------------------------------------------------------------------------------------------|-------------------------------------------------------------------------------------------------------------------------------------------------------------------------------------------------------|-------------------------------------------------------------------------------------|--|--|--|--|--|--|
| <b>11</b> Stock or stock options                                                           | <input checked="" type="checkbox"/> <b>None</b><br><table border="1" data-bbox="347 286 1484 383"> <tr><td> </td><td> </td></tr> <tr><td> </td><td> </td></tr> <tr><td> </td><td> </td></tr> </table> |                                                                                     |  |  |  |  |  |  |
|                                                                                            |                                                                                                                                                                                                       |                                                                                     |  |  |  |  |  |  |
|                                                                                            |                                                                                                                                                                                                       |                                                                                     |  |  |  |  |  |  |
|                                                                                            |                                                                                                                                                                                                       |                                                                                     |  |  |  |  |  |  |
| <b>12</b> Receipt of equipment, materials, drugs, medical writing, gifts or other services | <input checked="" type="checkbox"/> <b>None</b><br><table border="1" data-bbox="347 506 1484 602"> <tr><td> </td><td> </td></tr> <tr><td> </td><td> </td></tr> <tr><td> </td><td> </td></tr> </table> |                                                                                     |  |  |  |  |  |  |
|                                                                                            |                                                                                                                                                                                                       |                                                                                     |  |  |  |  |  |  |
|                                                                                            |                                                                                                                                                                                                       |                                                                                     |  |  |  |  |  |  |
|                                                                                            |                                                                                                                                                                                                       |                                                                                     |  |  |  |  |  |  |
| <b>13</b> Other financial or non-financial interests                                       | <input checked="" type="checkbox"/> <b>None</b><br><table border="1" data-bbox="347 786 1484 882"> <tr><td> </td><td> </td></tr> <tr><td> </td><td> </td></tr> <tr><td> </td><td> </td></tr> </table> |                                                                                     |  |  |  |  |  |  |
|                                                                                            |                                                                                                                                                                                                       |                                                                                     |  |  |  |  |  |  |
|                                                                                            |                                                                                                                                                                                                       |                                                                                     |  |  |  |  |  |  |
|                                                                                            |                                                                                                                                                                                                       |                                                                                     |  |  |  |  |  |  |

**Please place an “X” next to the following statement to indicate your agreement:**

I certify that I have answered every question and have not altered the wording of any of the questions on this form.

# ICMJE DISCLOSURE FORM

**Date:** 3/22/2023

**Your Name:** Dr Christopher Buckley

**Manuscript Title:** Artificial Intelligence for Dementia - Applied Models and Digital Health.

**Manuscript Number (if known):** Click or tap here to enter text.

In the interest of transparency, we ask you to disclose all relationships/activities/interests listed below that are related to the content of your manuscript. “Related” means any relation with for-profit or not-for-profit third parties whose interests may be affected by the content of the manuscript. Disclosure represents a commitment to transparency and does not necessarily indicate a bias. If you are in doubt about whether to list a relationship/activity/interest, it is preferable that you do so.

The author’s relationships/activities/interests should be defined broadly. For example, if your manuscript pertains to the epidemiology of hypertension, you should declare all relationships with manufacturers of antihypertensive medication, even if that medication is not mentioned in the manuscript.

In item #1 below, report all support for the work reported in this manuscript without time limit. For all other items, the time frame for disclosure is the past 36 months.

|                                                           |                                                                                                                                                                                | Name all entities with whom you have this relationship or indicate none (add rows as needed)                                                                                                                                                                                                                   | Specifications/Comments (e.g., if payments were made to you or to your institution) |  |  |  |  |  |                                                                                                                                                                                                                                                                                                                                                           |  |  |  |  |  |  |
|-----------------------------------------------------------|--------------------------------------------------------------------------------------------------------------------------------------------------------------------------------|----------------------------------------------------------------------------------------------------------------------------------------------------------------------------------------------------------------------------------------------------------------------------------------------------------------|-------------------------------------------------------------------------------------|--|--|--|--|--|-----------------------------------------------------------------------------------------------------------------------------------------------------------------------------------------------------------------------------------------------------------------------------------------------------------------------------------------------------------|--|--|--|--|--|--|
| <b>Time frame: Since the initial planning of the work</b> |                                                                                                                                                                                |                                                                                                                                                                                                                                                                                                                |                                                                                     |  |  |  |  |  |                                                                                                                                                                                                                                                                                                                                                           |  |  |  |  |  |  |
| <b>1</b>                                                  | All support for the present manuscript (e.g., funding, provision of study materials, medical writing, article processing charges, etc.)<br><b>No time limit for this item.</b> | <input checked="" type="checkbox"/> <b>None</b><br><table border="1" style="width: 100%; border-collapse: collapse;"> <tr><td style="height: 20px;"> </td><td style="width: 50%;"> </td></tr> <tr><td style="height: 20px;"> </td><td> </td></tr> <tr><td style="height: 20px;"> </td><td> </td></tr> </table> |                                                                                     |  |  |  |  |  | <table border="1" style="width: 100%; border-collapse: collapse;"> <tr><td style="height: 20px;"> </td><td style="width: 50%;"> </td></tr> <tr><td style="height: 20px;"> </td><td> </td></tr> <tr><td style="height: 20px;"> </td><td> </td></tr> </table> <p style="font-size: small; text-align: right;">Click the tab key to add additional rows.</p> |  |  |  |  |  |  |
|                                                           |                                                                                                                                                                                |                                                                                                                                                                                                                                                                                                                |                                                                                     |  |  |  |  |  |                                                                                                                                                                                                                                                                                                                                                           |  |  |  |  |  |  |
|                                                           |                                                                                                                                                                                |                                                                                                                                                                                                                                                                                                                |                                                                                     |  |  |  |  |  |                                                                                                                                                                                                                                                                                                                                                           |  |  |  |  |  |  |
|                                                           |                                                                                                                                                                                |                                                                                                                                                                                                                                                                                                                |                                                                                     |  |  |  |  |  |                                                                                                                                                                                                                                                                                                                                                           |  |  |  |  |  |  |
|                                                           |                                                                                                                                                                                |                                                                                                                                                                                                                                                                                                                |                                                                                     |  |  |  |  |  |                                                                                                                                                                                                                                                                                                                                                           |  |  |  |  |  |  |
|                                                           |                                                                                                                                                                                |                                                                                                                                                                                                                                                                                                                |                                                                                     |  |  |  |  |  |                                                                                                                                                                                                                                                                                                                                                           |  |  |  |  |  |  |
|                                                           |                                                                                                                                                                                |                                                                                                                                                                                                                                                                                                                |                                                                                     |  |  |  |  |  |                                                                                                                                                                                                                                                                                                                                                           |  |  |  |  |  |  |
| <b>Time frame: past 36 months</b>                         |                                                                                                                                                                                |                                                                                                                                                                                                                                                                                                                |                                                                                     |  |  |  |  |  |                                                                                                                                                                                                                                                                                                                                                           |  |  |  |  |  |  |
| <b>2</b>                                                  | Grants or contracts from any entity (if not indicated in item #1 above).                                                                                                       | <input checked="" type="checkbox"/> <b>None</b><br><table border="1" style="width: 100%; border-collapse: collapse;"> <tr><td style="height: 20px;"> </td><td style="width: 50%;"> </td></tr> <tr><td style="height: 20px;"> </td><td> </td></tr> <tr><td style="height: 20px;"> </td><td> </td></tr> </table> |                                                                                     |  |  |  |  |  | <table border="1" style="width: 100%; border-collapse: collapse;"> <tr><td style="height: 20px;"> </td><td style="width: 50%;"> </td></tr> <tr><td style="height: 20px;"> </td><td> </td></tr> <tr><td style="height: 20px;"> </td><td> </td></tr> </table>                                                                                               |  |  |  |  |  |  |
|                                                           |                                                                                                                                                                                |                                                                                                                                                                                                                                                                                                                |                                                                                     |  |  |  |  |  |                                                                                                                                                                                                                                                                                                                                                           |  |  |  |  |  |  |
|                                                           |                                                                                                                                                                                |                                                                                                                                                                                                                                                                                                                |                                                                                     |  |  |  |  |  |                                                                                                                                                                                                                                                                                                                                                           |  |  |  |  |  |  |
|                                                           |                                                                                                                                                                                |                                                                                                                                                                                                                                                                                                                |                                                                                     |  |  |  |  |  |                                                                                                                                                                                                                                                                                                                                                           |  |  |  |  |  |  |
|                                                           |                                                                                                                                                                                |                                                                                                                                                                                                                                                                                                                |                                                                                     |  |  |  |  |  |                                                                                                                                                                                                                                                                                                                                                           |  |  |  |  |  |  |
|                                                           |                                                                                                                                                                                |                                                                                                                                                                                                                                                                                                                |                                                                                     |  |  |  |  |  |                                                                                                                                                                                                                                                                                                                                                           |  |  |  |  |  |  |
|                                                           |                                                                                                                                                                                |                                                                                                                                                                                                                                                                                                                |                                                                                     |  |  |  |  |  |                                                                                                                                                                                                                                                                                                                                                           |  |  |  |  |  |  |
| <b>3</b>                                                  | Royalties or licenses                                                                                                                                                          | <input checked="" type="checkbox"/> <b>None</b><br><table border="1" style="width: 100%; border-collapse: collapse;"> <tr><td style="height: 20px;"> </td><td style="width: 50%;"> </td></tr> <tr><td style="height: 20px;"> </td><td> </td></tr> <tr><td style="height: 20px;"> </td><td> </td></tr> </table> |                                                                                     |  |  |  |  |  | <table border="1" style="width: 100%; border-collapse: collapse;"> <tr><td style="height: 20px;"> </td><td style="width: 50%;"> </td></tr> <tr><td style="height: 20px;"> </td><td> </td></tr> <tr><td style="height: 20px;"> </td><td> </td></tr> </table>                                                                                               |  |  |  |  |  |  |
|                                                           |                                                                                                                                                                                |                                                                                                                                                                                                                                                                                                                |                                                                                     |  |  |  |  |  |                                                                                                                                                                                                                                                                                                                                                           |  |  |  |  |  |  |
|                                                           |                                                                                                                                                                                |                                                                                                                                                                                                                                                                                                                |                                                                                     |  |  |  |  |  |                                                                                                                                                                                                                                                                                                                                                           |  |  |  |  |  |  |
|                                                           |                                                                                                                                                                                |                                                                                                                                                                                                                                                                                                                |                                                                                     |  |  |  |  |  |                                                                                                                                                                                                                                                                                                                                                           |  |  |  |  |  |  |
|                                                           |                                                                                                                                                                                |                                                                                                                                                                                                                                                                                                                |                                                                                     |  |  |  |  |  |                                                                                                                                                                                                                                                                                                                                                           |  |  |  |  |  |  |
|                                                           |                                                                                                                                                                                |                                                                                                                                                                                                                                                                                                                |                                                                                     |  |  |  |  |  |                                                                                                                                                                                                                                                                                                                                                           |  |  |  |  |  |  |
|                                                           |                                                                                                                                                                                |                                                                                                                                                                                                                                                                                                                |                                                                                     |  |  |  |  |  |                                                                                                                                                                                                                                                                                                                                                           |  |  |  |  |  |  |

|    |                                                                                                              | Name all entities with whom you have this relationship or indicate none (add rows as needed)                                                                                                                                                                                                                         | Specifications/Comments (e.g., if payments were made to you or to your institution) |  |  |  |  |  |  |
|----|--------------------------------------------------------------------------------------------------------------|----------------------------------------------------------------------------------------------------------------------------------------------------------------------------------------------------------------------------------------------------------------------------------------------------------------------|-------------------------------------------------------------------------------------|--|--|--|--|--|--|
| 4  | Consulting fees                                                                                              | <input checked="" type="checkbox"/> <b>None</b><br><table border="1" style="width: 100%; border-collapse: collapse;"> <tr><td style="width: 50%; height: 20px;"></td><td style="width: 50%;"></td></tr> <tr><td style="height: 20px;"></td><td></td></tr> <tr><td style="height: 20px;"></td><td></td></tr> </table> |                                                                                     |  |  |  |  |  |  |
|    |                                                                                                              |                                                                                                                                                                                                                                                                                                                      |                                                                                     |  |  |  |  |  |  |
|    |                                                                                                              |                                                                                                                                                                                                                                                                                                                      |                                                                                     |  |  |  |  |  |  |
|    |                                                                                                              |                                                                                                                                                                                                                                                                                                                      |                                                                                     |  |  |  |  |  |  |
| 5  | Payment or honoraria for lectures, presentations, speakers bureaus, manuscript writing or educational events | <input checked="" type="checkbox"/> <b>None</b><br><table border="1" style="width: 100%; border-collapse: collapse;"> <tr><td style="width: 50%; height: 20px;"></td><td style="width: 50%;"></td></tr> <tr><td style="height: 20px;"></td><td></td></tr> <tr><td style="height: 20px;"></td><td></td></tr> </table> |                                                                                     |  |  |  |  |  |  |
|    |                                                                                                              |                                                                                                                                                                                                                                                                                                                      |                                                                                     |  |  |  |  |  |  |
|    |                                                                                                              |                                                                                                                                                                                                                                                                                                                      |                                                                                     |  |  |  |  |  |  |
|    |                                                                                                              |                                                                                                                                                                                                                                                                                                                      |                                                                                     |  |  |  |  |  |  |
| 6  | Payment for expert testimony                                                                                 | <input checked="" type="checkbox"/> <b>None</b><br><table border="1" style="width: 100%; border-collapse: collapse;"> <tr><td style="width: 50%; height: 20px;"></td><td style="width: 50%;"></td></tr> <tr><td style="height: 20px;"></td><td></td></tr> <tr><td style="height: 20px;"></td><td></td></tr> </table> |                                                                                     |  |  |  |  |  |  |
|    |                                                                                                              |                                                                                                                                                                                                                                                                                                                      |                                                                                     |  |  |  |  |  |  |
|    |                                                                                                              |                                                                                                                                                                                                                                                                                                                      |                                                                                     |  |  |  |  |  |  |
|    |                                                                                                              |                                                                                                                                                                                                                                                                                                                      |                                                                                     |  |  |  |  |  |  |
| 7  | Support for attending meetings and/or travel                                                                 | <input checked="" type="checkbox"/> <b>None</b><br><table border="1" style="width: 100%; border-collapse: collapse;"> <tr><td style="width: 50%; height: 20px;"></td><td style="width: 50%;"></td></tr> <tr><td style="height: 20px;"></td><td></td></tr> <tr><td style="height: 20px;"></td><td></td></tr> </table> |                                                                                     |  |  |  |  |  |  |
|    |                                                                                                              |                                                                                                                                                                                                                                                                                                                      |                                                                                     |  |  |  |  |  |  |
|    |                                                                                                              |                                                                                                                                                                                                                                                                                                                      |                                                                                     |  |  |  |  |  |  |
|    |                                                                                                              |                                                                                                                                                                                                                                                                                                                      |                                                                                     |  |  |  |  |  |  |
| 8  | Patents planned, issued or pending                                                                           | <input checked="" type="checkbox"/> <b>None</b><br><table border="1" style="width: 100%; border-collapse: collapse;"> <tr><td style="width: 50%; height: 20px;"></td><td style="width: 50%;"></td></tr> <tr><td style="height: 20px;"></td><td></td></tr> <tr><td style="height: 20px;"></td><td></td></tr> </table> |                                                                                     |  |  |  |  |  |  |
|    |                                                                                                              |                                                                                                                                                                                                                                                                                                                      |                                                                                     |  |  |  |  |  |  |
|    |                                                                                                              |                                                                                                                                                                                                                                                                                                                      |                                                                                     |  |  |  |  |  |  |
|    |                                                                                                              |                                                                                                                                                                                                                                                                                                                      |                                                                                     |  |  |  |  |  |  |
| 9  | Participation on a Data Safety Monitoring Board or Advisory Board                                            | <input checked="" type="checkbox"/> <b>None</b><br><table border="1" style="width: 100%; border-collapse: collapse;"> <tr><td style="width: 50%; height: 20px;"></td><td style="width: 50%;"></td></tr> <tr><td style="height: 20px;"></td><td></td></tr> <tr><td style="height: 20px;"></td><td></td></tr> </table> |                                                                                     |  |  |  |  |  |  |
|    |                                                                                                              |                                                                                                                                                                                                                                                                                                                      |                                                                                     |  |  |  |  |  |  |
|    |                                                                                                              |                                                                                                                                                                                                                                                                                                                      |                                                                                     |  |  |  |  |  |  |
|    |                                                                                                              |                                                                                                                                                                                                                                                                                                                      |                                                                                     |  |  |  |  |  |  |
| 10 | Leadership or fiduciary role in other board, society, committee or advocacy group, paid or unpaid            | <input checked="" type="checkbox"/> <b>None</b><br><table border="1" style="width: 100%; border-collapse: collapse;"> <tr><td style="width: 50%; height: 20px;"></td><td style="width: 50%;"></td></tr> <tr><td style="height: 20px;"></td><td></td></tr> <tr><td style="height: 20px;"></td><td></td></tr> </table> |                                                                                     |  |  |  |  |  |  |
|    |                                                                                                              |                                                                                                                                                                                                                                                                                                                      |                                                                                     |  |  |  |  |  |  |
|    |                                                                                                              |                                                                                                                                                                                                                                                                                                                      |                                                                                     |  |  |  |  |  |  |
|    |                                                                                                              |                                                                                                                                                                                                                                                                                                                      |                                                                                     |  |  |  |  |  |  |

|    | Name all entities with whom you have this relationship or indicate none (add rows as needed) | Specifications/Comments (e.g., if payments were made to you or to your institution)                                                                                                                                                                                                                      |  |  |  |  |  |  |
|----|----------------------------------------------------------------------------------------------|----------------------------------------------------------------------------------------------------------------------------------------------------------------------------------------------------------------------------------------------------------------------------------------------------------|--|--|--|--|--|--|
| 11 | Stock or stock options                                                                       | <input checked="" type="checkbox"/> <b>None</b><br><table border="1" style="width: 100%; border-collapse: collapse;"> <tr><td style="height: 20px;"></td><td style="width: 50%;"></td></tr> <tr><td style="height: 20px;"></td><td></td></tr> <tr><td style="height: 20px;"></td><td></td></tr> </table> |  |  |  |  |  |  |
|    |                                                                                              |                                                                                                                                                                                                                                                                                                          |  |  |  |  |  |  |
|    |                                                                                              |                                                                                                                                                                                                                                                                                                          |  |  |  |  |  |  |
|    |                                                                                              |                                                                                                                                                                                                                                                                                                          |  |  |  |  |  |  |
| 12 | Receipt of equipment, materials, drugs, medical writing, gifts or other services             | <input checked="" type="checkbox"/> <b>None</b><br><table border="1" style="width: 100%; border-collapse: collapse;"> <tr><td style="height: 20px;"></td><td style="width: 50%;"></td></tr> <tr><td style="height: 20px;"></td><td></td></tr> <tr><td style="height: 20px;"></td><td></td></tr> </table> |  |  |  |  |  |  |
|    |                                                                                              |                                                                                                                                                                                                                                                                                                          |  |  |  |  |  |  |
|    |                                                                                              |                                                                                                                                                                                                                                                                                                          |  |  |  |  |  |  |
|    |                                                                                              |                                                                                                                                                                                                                                                                                                          |  |  |  |  |  |  |
| 13 | Other financial or non-financial interests                                                   | <input checked="" type="checkbox"/> <b>None</b><br><table border="1" style="width: 100%; border-collapse: collapse;"> <tr><td style="height: 20px;"></td><td style="width: 50%;"></td></tr> <tr><td style="height: 20px;"></td><td></td></tr> <tr><td style="height: 20px;"></td><td></td></tr> </table> |  |  |  |  |  |  |
|    |                                                                                              |                                                                                                                                                                                                                                                                                                          |  |  |  |  |  |  |
|    |                                                                                              |                                                                                                                                                                                                                                                                                                          |  |  |  |  |  |  |
|    |                                                                                              |                                                                                                                                                                                                                                                                                                          |  |  |  |  |  |  |

**Please place an “X” next to the following statement to indicate your agreement:**

I certify that I have answered every question and have not altered the wording of any of the questions on this form.

## ICMJE DISCLOSURE FORM

**Date:** 4/19/2023

**Your Name:** VASILIKI ORGETA

**Manuscript Title:** Artificial Intelligence for Dementia - Applied Models and Digital Health

**Manuscript Number (if known):** Click or tap here to enter text.

In the interest of transparency, we ask you to disclose all relationships/activities/interests listed below that are related to the content of your manuscript. “Related” means any relation with for-profit or not-for-profit third parties whose interests may be affected by the content of the manuscript. Disclosure represents a commitment to transparency and does not necessarily indicate a bias. If you are in doubt about whether to list a relationship/activity/interest, it is preferable that you do so.

The author’s relationships/activities/interests should be defined broadly. For example, if your manuscript pertains to the epidemiology of hypertension, you should declare all relationships with manufacturers of antihypertensive medication, even if that medication is not mentioned in the manuscript.

In item #1 below, report all support for the work reported in this manuscript without time limit. For all other items, the time frame for disclosure is the past 36 months.

|                                                           | Name all entities with whom you have this relationship or indicate none (add rows as needed) | Specifications/Comments (e.g., if payments were made to you or to your institution) |
|-----------------------------------------------------------|----------------------------------------------------------------------------------------------|-------------------------------------------------------------------------------------|
| <b>Time frame: Since the initial planning of the work</b> |                                                                                              |                                                                                     |

|                                   |                                                                                                                                                                                | Name all entities with whom you have this relationship or indicate none (add rows as needed)                                                                                                                                                                                                                         | Specifications/Comments (e.g., if payments were made to you or to your institution) |  |  |  |  |  |                                                                                                                                                                                                                                                                                                                                                               |  |  |  |  |  |  |
|-----------------------------------|--------------------------------------------------------------------------------------------------------------------------------------------------------------------------------|----------------------------------------------------------------------------------------------------------------------------------------------------------------------------------------------------------------------------------------------------------------------------------------------------------------------|-------------------------------------------------------------------------------------|--|--|--|--|--|---------------------------------------------------------------------------------------------------------------------------------------------------------------------------------------------------------------------------------------------------------------------------------------------------------------------------------------------------------------|--|--|--|--|--|--|
| <b>1</b>                          | All support for the present manuscript (e.g., funding, provision of study materials, medical writing, article processing charges, etc.)<br><b>No time limit for this item.</b> | <input checked="" type="checkbox"/> <b>None</b><br><table border="1" style="width: 100%; border-collapse: collapse;"> <tr><td style="width: 50%; height: 20px;"></td><td style="width: 50%;"></td></tr> <tr><td style="height: 20px;"></td><td></td></tr> <tr><td style="height: 20px;"></td><td></td></tr> </table> |                                                                                     |  |  |  |  |  | <table border="1" style="width: 100%; border-collapse: collapse;"> <tr><td style="width: 50%; height: 20px;"></td><td style="width: 50%;"></td></tr> <tr><td style="height: 20px;"></td><td></td></tr> <tr><td style="height: 20px;"></td><td></td></tr> </table> <p style="font-size: small; margin-top: 5px;">Click the tab key to add additional rows.</p> |  |  |  |  |  |  |
|                                   |                                                                                                                                                                                |                                                                                                                                                                                                                                                                                                                      |                                                                                     |  |  |  |  |  |                                                                                                                                                                                                                                                                                                                                                               |  |  |  |  |  |  |
|                                   |                                                                                                                                                                                |                                                                                                                                                                                                                                                                                                                      |                                                                                     |  |  |  |  |  |                                                                                                                                                                                                                                                                                                                                                               |  |  |  |  |  |  |
|                                   |                                                                                                                                                                                |                                                                                                                                                                                                                                                                                                                      |                                                                                     |  |  |  |  |  |                                                                                                                                                                                                                                                                                                                                                               |  |  |  |  |  |  |
|                                   |                                                                                                                                                                                |                                                                                                                                                                                                                                                                                                                      |                                                                                     |  |  |  |  |  |                                                                                                                                                                                                                                                                                                                                                               |  |  |  |  |  |  |
|                                   |                                                                                                                                                                                |                                                                                                                                                                                                                                                                                                                      |                                                                                     |  |  |  |  |  |                                                                                                                                                                                                                                                                                                                                                               |  |  |  |  |  |  |
|                                   |                                                                                                                                                                                |                                                                                                                                                                                                                                                                                                                      |                                                                                     |  |  |  |  |  |                                                                                                                                                                                                                                                                                                                                                               |  |  |  |  |  |  |
| <b>Time frame: past 36 months</b> |                                                                                                                                                                                |                                                                                                                                                                                                                                                                                                                      |                                                                                     |  |  |  |  |  |                                                                                                                                                                                                                                                                                                                                                               |  |  |  |  |  |  |
| <b>2</b>                          | Grants or contracts from any entity (if not indicated in item #1 above).                                                                                                       | <input checked="" type="checkbox"/> <b>None</b><br><table border="1" style="width: 100%; border-collapse: collapse;"> <tr><td style="width: 50%; height: 20px;"></td><td style="width: 50%;"></td></tr> <tr><td style="height: 20px;"></td><td></td></tr> <tr><td style="height: 20px;"></td><td></td></tr> </table> |                                                                                     |  |  |  |  |  | <table border="1" style="width: 100%; border-collapse: collapse;"> <tr><td style="width: 50%; height: 20px;"></td><td style="width: 50%;"></td></tr> <tr><td style="height: 20px;"></td><td></td></tr> <tr><td style="height: 20px;"></td><td></td></tr> </table>                                                                                             |  |  |  |  |  |  |
|                                   |                                                                                                                                                                                |                                                                                                                                                                                                                                                                                                                      |                                                                                     |  |  |  |  |  |                                                                                                                                                                                                                                                                                                                                                               |  |  |  |  |  |  |
|                                   |                                                                                                                                                                                |                                                                                                                                                                                                                                                                                                                      |                                                                                     |  |  |  |  |  |                                                                                                                                                                                                                                                                                                                                                               |  |  |  |  |  |  |
|                                   |                                                                                                                                                                                |                                                                                                                                                                                                                                                                                                                      |                                                                                     |  |  |  |  |  |                                                                                                                                                                                                                                                                                                                                                               |  |  |  |  |  |  |
|                                   |                                                                                                                                                                                |                                                                                                                                                                                                                                                                                                                      |                                                                                     |  |  |  |  |  |                                                                                                                                                                                                                                                                                                                                                               |  |  |  |  |  |  |
|                                   |                                                                                                                                                                                |                                                                                                                                                                                                                                                                                                                      |                                                                                     |  |  |  |  |  |                                                                                                                                                                                                                                                                                                                                                               |  |  |  |  |  |  |
|                                   |                                                                                                                                                                                |                                                                                                                                                                                                                                                                                                                      |                                                                                     |  |  |  |  |  |                                                                                                                                                                                                                                                                                                                                                               |  |  |  |  |  |  |
| <b>3</b>                          | Royalties or licenses                                                                                                                                                          | <input checked="" type="checkbox"/> <b>None</b><br><table border="1" style="width: 100%; border-collapse: collapse;"> <tr><td style="width: 50%; height: 20px;"></td><td style="width: 50%;"></td></tr> <tr><td style="height: 20px;"></td><td></td></tr> <tr><td style="height: 20px;"></td><td></td></tr> </table> |                                                                                     |  |  |  |  |  | <table border="1" style="width: 100%; border-collapse: collapse;"> <tr><td style="width: 50%; height: 20px;"></td><td style="width: 50%;"></td></tr> <tr><td style="height: 20px;"></td><td></td></tr> <tr><td style="height: 20px;"></td><td></td></tr> </table>                                                                                             |  |  |  |  |  |  |
|                                   |                                                                                                                                                                                |                                                                                                                                                                                                                                                                                                                      |                                                                                     |  |  |  |  |  |                                                                                                                                                                                                                                                                                                                                                               |  |  |  |  |  |  |
|                                   |                                                                                                                                                                                |                                                                                                                                                                                                                                                                                                                      |                                                                                     |  |  |  |  |  |                                                                                                                                                                                                                                                                                                                                                               |  |  |  |  |  |  |
|                                   |                                                                                                                                                                                |                                                                                                                                                                                                                                                                                                                      |                                                                                     |  |  |  |  |  |                                                                                                                                                                                                                                                                                                                                                               |  |  |  |  |  |  |
|                                   |                                                                                                                                                                                |                                                                                                                                                                                                                                                                                                                      |                                                                                     |  |  |  |  |  |                                                                                                                                                                                                                                                                                                                                                               |  |  |  |  |  |  |
|                                   |                                                                                                                                                                                |                                                                                                                                                                                                                                                                                                                      |                                                                                     |  |  |  |  |  |                                                                                                                                                                                                                                                                                                                                                               |  |  |  |  |  |  |
|                                   |                                                                                                                                                                                |                                                                                                                                                                                                                                                                                                                      |                                                                                     |  |  |  |  |  |                                                                                                                                                                                                                                                                                                                                                               |  |  |  |  |  |  |
| <b>4</b>                          | Consulting fees                                                                                                                                                                | <input checked="" type="checkbox"/> <b>None</b><br><table border="1" style="width: 100%; border-collapse: collapse;"> <tr><td style="width: 50%; height: 20px;"></td><td style="width: 50%;"></td></tr> <tr><td style="height: 20px;"></td><td></td></tr> <tr><td style="height: 20px;"></td><td></td></tr> </table> |                                                                                     |  |  |  |  |  | <table border="1" style="width: 100%; border-collapse: collapse;"> <tr><td style="width: 50%; height: 20px;"></td><td style="width: 50%;"></td></tr> <tr><td style="height: 20px;"></td><td></td></tr> <tr><td style="height: 20px;"></td><td></td></tr> </table>                                                                                             |  |  |  |  |  |  |
|                                   |                                                                                                                                                                                |                                                                                                                                                                                                                                                                                                                      |                                                                                     |  |  |  |  |  |                                                                                                                                                                                                                                                                                                                                                               |  |  |  |  |  |  |
|                                   |                                                                                                                                                                                |                                                                                                                                                                                                                                                                                                                      |                                                                                     |  |  |  |  |  |                                                                                                                                                                                                                                                                                                                                                               |  |  |  |  |  |  |
|                                   |                                                                                                                                                                                |                                                                                                                                                                                                                                                                                                                      |                                                                                     |  |  |  |  |  |                                                                                                                                                                                                                                                                                                                                                               |  |  |  |  |  |  |
|                                   |                                                                                                                                                                                |                                                                                                                                                                                                                                                                                                                      |                                                                                     |  |  |  |  |  |                                                                                                                                                                                                                                                                                                                                                               |  |  |  |  |  |  |
|                                   |                                                                                                                                                                                |                                                                                                                                                                                                                                                                                                                      |                                                                                     |  |  |  |  |  |                                                                                                                                                                                                                                                                                                                                                               |  |  |  |  |  |  |
|                                   |                                                                                                                                                                                |                                                                                                                                                                                                                                                                                                                      |                                                                                     |  |  |  |  |  |                                                                                                                                                                                                                                                                                                                                                               |  |  |  |  |  |  |
| <b>5</b>                          | Payment or honoraria for lectures, presentations, speakers bureaus, manuscript writing or educational events                                                                   | <input checked="" type="checkbox"/> <b>None</b><br><table border="1" style="width: 100%; border-collapse: collapse;"> <tr><td style="width: 50%; height: 20px;"></td><td style="width: 50%;"></td></tr> <tr><td style="height: 20px;"></td><td></td></tr> <tr><td style="height: 20px;"></td><td></td></tr> </table> |                                                                                     |  |  |  |  |  | <table border="1" style="width: 100%; border-collapse: collapse;"> <tr><td style="width: 50%; height: 20px;"></td><td style="width: 50%;"></td></tr> <tr><td style="height: 20px;"></td><td></td></tr> <tr><td style="height: 20px;"></td><td></td></tr> </table>                                                                                             |  |  |  |  |  |  |
|                                   |                                                                                                                                                                                |                                                                                                                                                                                                                                                                                                                      |                                                                                     |  |  |  |  |  |                                                                                                                                                                                                                                                                                                                                                               |  |  |  |  |  |  |
|                                   |                                                                                                                                                                                |                                                                                                                                                                                                                                                                                                                      |                                                                                     |  |  |  |  |  |                                                                                                                                                                                                                                                                                                                                                               |  |  |  |  |  |  |
|                                   |                                                                                                                                                                                |                                                                                                                                                                                                                                                                                                                      |                                                                                     |  |  |  |  |  |                                                                                                                                                                                                                                                                                                                                                               |  |  |  |  |  |  |
|                                   |                                                                                                                                                                                |                                                                                                                                                                                                                                                                                                                      |                                                                                     |  |  |  |  |  |                                                                                                                                                                                                                                                                                                                                                               |  |  |  |  |  |  |
|                                   |                                                                                                                                                                                |                                                                                                                                                                                                                                                                                                                      |                                                                                     |  |  |  |  |  |                                                                                                                                                                                                                                                                                                                                                               |  |  |  |  |  |  |
|                                   |                                                                                                                                                                                |                                                                                                                                                                                                                                                                                                                      |                                                                                     |  |  |  |  |  |                                                                                                                                                                                                                                                                                                                                                               |  |  |  |  |  |  |
| <b>6</b>                          | Payment for expert testimony                                                                                                                                                   | <input checked="" type="checkbox"/> <b>None</b><br><table border="1" style="width: 100%; border-collapse: collapse;"> <tr><td style="width: 50%; height: 20px;"></td><td style="width: 50%;"></td></tr> <tr><td style="height: 20px;"></td><td></td></tr> <tr><td style="height: 20px;"></td><td></td></tr> </table> |                                                                                     |  |  |  |  |  | <table border="1" style="width: 100%; border-collapse: collapse;"> <tr><td style="width: 50%; height: 20px;"></td><td style="width: 50%;"></td></tr> <tr><td style="height: 20px;"></td><td></td></tr> <tr><td style="height: 20px;"></td><td></td></tr> </table>                                                                                             |  |  |  |  |  |  |
|                                   |                                                                                                                                                                                |                                                                                                                                                                                                                                                                                                                      |                                                                                     |  |  |  |  |  |                                                                                                                                                                                                                                                                                                                                                               |  |  |  |  |  |  |
|                                   |                                                                                                                                                                                |                                                                                                                                                                                                                                                                                                                      |                                                                                     |  |  |  |  |  |                                                                                                                                                                                                                                                                                                                                                               |  |  |  |  |  |  |
|                                   |                                                                                                                                                                                |                                                                                                                                                                                                                                                                                                                      |                                                                                     |  |  |  |  |  |                                                                                                                                                                                                                                                                                                                                                               |  |  |  |  |  |  |
|                                   |                                                                                                                                                                                |                                                                                                                                                                                                                                                                                                                      |                                                                                     |  |  |  |  |  |                                                                                                                                                                                                                                                                                                                                                               |  |  |  |  |  |  |
|                                   |                                                                                                                                                                                |                                                                                                                                                                                                                                                                                                                      |                                                                                     |  |  |  |  |  |                                                                                                                                                                                                                                                                                                                                                               |  |  |  |  |  |  |
|                                   |                                                                                                                                                                                |                                                                                                                                                                                                                                                                                                                      |                                                                                     |  |  |  |  |  |                                                                                                                                                                                                                                                                                                                                                               |  |  |  |  |  |  |

|    |                                                                                                   | Name all entities with whom you have this relationship or indicate none (add rows as needed)                                                                                                      | Specifications/Comments (e.g., if payments were made to you or to your institution) |  |  |  |  |  |  |
|----|---------------------------------------------------------------------------------------------------|---------------------------------------------------------------------------------------------------------------------------------------------------------------------------------------------------|-------------------------------------------------------------------------------------|--|--|--|--|--|--|
| 7  | Support for attending meetings and/or travel                                                      | <input checked="" type="checkbox"/> <b>None</b><br><table border="1" data-bbox="347 286 1484 383"> <tr><td></td><td></td></tr> <tr><td></td><td></td></tr> <tr><td></td><td></td></tr> </table>   |                                                                                     |  |  |  |  |  |  |
|    |                                                                                                   |                                                                                                                                                                                                   |                                                                                     |  |  |  |  |  |  |
|    |                                                                                                   |                                                                                                                                                                                                   |                                                                                     |  |  |  |  |  |  |
|    |                                                                                                   |                                                                                                                                                                                                   |                                                                                     |  |  |  |  |  |  |
| 8  | Patents planned, issued or pending                                                                | <input checked="" type="checkbox"/> <b>None</b><br><table border="1" data-bbox="347 506 1484 602"> <tr><td></td><td></td></tr> <tr><td></td><td></td></tr> <tr><td></td><td></td></tr> </table>   |                                                                                     |  |  |  |  |  |  |
|    |                                                                                                   |                                                                                                                                                                                                   |                                                                                     |  |  |  |  |  |  |
|    |                                                                                                   |                                                                                                                                                                                                   |                                                                                     |  |  |  |  |  |  |
|    |                                                                                                   |                                                                                                                                                                                                   |                                                                                     |  |  |  |  |  |  |
| 9  | Participation on a Data Safety Monitoring Board or Advisory Board                                 | <input checked="" type="checkbox"/> <b>None</b><br><table border="1" data-bbox="347 725 1484 822"> <tr><td></td><td></td></tr> <tr><td></td><td></td></tr> <tr><td></td><td></td></tr> </table>   |                                                                                     |  |  |  |  |  |  |
|    |                                                                                                   |                                                                                                                                                                                                   |                                                                                     |  |  |  |  |  |  |
|    |                                                                                                   |                                                                                                                                                                                                   |                                                                                     |  |  |  |  |  |  |
|    |                                                                                                   |                                                                                                                                                                                                   |                                                                                     |  |  |  |  |  |  |
| 10 | Leadership or fiduciary role in other board, society, committee or advocacy group, paid or unpaid | <input checked="" type="checkbox"/> <b>None</b><br><table border="1" data-bbox="347 967 1484 1064"> <tr><td></td><td></td></tr> <tr><td></td><td></td></tr> <tr><td></td><td></td></tr> </table>  |                                                                                     |  |  |  |  |  |  |
|    |                                                                                                   |                                                                                                                                                                                                   |                                                                                     |  |  |  |  |  |  |
|    |                                                                                                   |                                                                                                                                                                                                   |                                                                                     |  |  |  |  |  |  |
|    |                                                                                                   |                                                                                                                                                                                                   |                                                                                     |  |  |  |  |  |  |
| 11 | Stock or stock options                                                                            | <input checked="" type="checkbox"/> <b>None</b><br><table border="1" data-bbox="347 1281 1484 1377"> <tr><td></td><td></td></tr> <tr><td></td><td></td></tr> <tr><td></td><td></td></tr> </table> |                                                                                     |  |  |  |  |  |  |
|    |                                                                                                   |                                                                                                                                                                                                   |                                                                                     |  |  |  |  |  |  |
|    |                                                                                                   |                                                                                                                                                                                                   |                                                                                     |  |  |  |  |  |  |
|    |                                                                                                   |                                                                                                                                                                                                   |                                                                                     |  |  |  |  |  |  |
| 12 | Receipt of equipment, materials, drugs, medical writing, gifts or other services                  | <input checked="" type="checkbox"/> <b>None</b><br><table border="1" data-bbox="347 1500 1484 1597"> <tr><td></td><td></td></tr> <tr><td></td><td></td></tr> <tr><td></td><td></td></tr> </table> |                                                                                     |  |  |  |  |  |  |
|    |                                                                                                   |                                                                                                                                                                                                   |                                                                                     |  |  |  |  |  |  |
|    |                                                                                                   |                                                                                                                                                                                                   |                                                                                     |  |  |  |  |  |  |
|    |                                                                                                   |                                                                                                                                                                                                   |                                                                                     |  |  |  |  |  |  |
| 13 | Other financial or non-financial interests                                                        | <input checked="" type="checkbox"/> <b>None</b><br><table border="1" data-bbox="347 1783 1484 1879"> <tr><td></td><td></td></tr> <tr><td></td><td></td></tr> <tr><td></td><td></td></tr> </table> |                                                                                     |  |  |  |  |  |  |
|    |                                                                                                   |                                                                                                                                                                                                   |                                                                                     |  |  |  |  |  |  |
|    |                                                                                                   |                                                                                                                                                                                                   |                                                                                     |  |  |  |  |  |  |
|    |                                                                                                   |                                                                                                                                                                                                   |                                                                                     |  |  |  |  |  |  |

**Please place an "X" next to the following statement to indicate your agreement:**

I certify that I have answered every question and have not altered the wording of any of the questions on this form.

# ICMJE DISCLOSURE FORM

**Date:** 4/1/2023

**Your Name:** Dr Claire Lancaster

**Manuscript Title:** Artificial Intelligence for Dementia - Applied Models and Digital Health

**Manuscript Number (if known):** Click or tap here to enter text.

In the interest of transparency, we ask you to disclose all relationships/activities/interests listed below that are related to the content of your manuscript. “Related” means any relation with for-profit or not-for-profit third parties whose interests may be affected by the content of the manuscript. Disclosure represents a commitment to transparency and does not necessarily indicate a bias. If you are in doubt about whether to list a relationship/activity/interest, it is preferable that you do so.

The author’s relationships/activities/interests should be defined broadly. For example, if your manuscript pertains to the epidemiology of hypertension, you should declare all relationships with manufacturers of antihypertensive medication, even if that medication is not mentioned in the manuscript.

In item #1 below, report all support for the work reported in this manuscript without time limit. For all other items, the time frame for disclosure is the past 36 months.

|   |                                                                                                                                                                                | Name all entities with whom you have this relationship or indicate none (add rows as needed) | Specifications/Comments (e.g., if payments were made to you or to your institution)    |
|---|--------------------------------------------------------------------------------------------------------------------------------------------------------------------------------|----------------------------------------------------------------------------------------------|----------------------------------------------------------------------------------------|
| 1 | All support for the present manuscript (e.g., funding, provision of study materials, medical writing, article processing charges, etc.)<br><b>No time limit for this item.</b> | <input type="checkbox"/> <b>None</b>                                                         |                                                                                        |
|   |                                                                                                                                                                                | Alzheimer’s Society                                                                          | Junior Fellowship                                                                      |
|   |                                                                                                                                                                                | Alzheimer’s Research UK                                                                      | Grant Funding (Salary – 10%) - Early Detection of Neurodegenerative Disease consortium |
|   |                                                                                                                                                                                | Click the tab key to add additional rows.                                                    |                                                                                        |
| 2 | Grants or contracts from any entity (if not indicated in item #1 above).                                                                                                       | <input checked="" type="checkbox"/> <b>None</b>                                              |                                                                                        |
|   |                                                                                                                                                                                |                                                                                              |                                                                                        |
|   |                                                                                                                                                                                |                                                                                              |                                                                                        |
| 3 | Royalties or licenses                                                                                                                                                          | <input checked="" type="checkbox"/> <b>None</b>                                              |                                                                                        |
|   |                                                                                                                                                                                |                                                                                              |                                                                                        |
|   |                                                                                                                                                                                |                                                                                              |                                                                                        |

|                                             |                                                                                                              | Name all entities with whom you have this relationship or indicate none (add rows as needed)                                                                                                                                                                                                                                                                                                     | Specifications/Comments (e.g., if payments were made to you or to your institution) |                                                                             |  |  |  |  |  |
|---------------------------------------------|--------------------------------------------------------------------------------------------------------------|--------------------------------------------------------------------------------------------------------------------------------------------------------------------------------------------------------------------------------------------------------------------------------------------------------------------------------------------------------------------------------------------------|-------------------------------------------------------------------------------------|-----------------------------------------------------------------------------|--|--|--|--|--|
| 4                                           | Consulting fees                                                                                              | <input checked="" type="checkbox"/> <b>None</b><br><table border="1" style="width: 100%; border-collapse: collapse;"> <tr><td style="height: 20px;"></td><td style="width: 20%;"></td></tr> <tr><td style="height: 20px;"></td><td></td></tr> <tr><td style="height: 20px;"></td><td></td></tr> </table>                                                                                         |                                                                                     |                                                                             |  |  |  |  |  |
|                                             |                                                                                                              |                                                                                                                                                                                                                                                                                                                                                                                                  |                                                                                     |                                                                             |  |  |  |  |  |
|                                             |                                                                                                              |                                                                                                                                                                                                                                                                                                                                                                                                  |                                                                                     |                                                                             |  |  |  |  |  |
|                                             |                                                                                                              |                                                                                                                                                                                                                                                                                                                                                                                                  |                                                                                     |                                                                             |  |  |  |  |  |
| 5                                           | Payment or honoraria for lectures, presentations, speakers bureaus, manuscript writing or educational events | <input type="checkbox"/> <b>None</b><br><table border="1" style="width: 100%; border-collapse: collapse;"> <tr> <td style="width: 80%;">School of Psychology, University of Sussex</td> <td></td> </tr> <tr><td style="height: 20px;"></td><td></td></tr> <tr><td style="height: 20px;"></td><td></td></tr> </table>                                                                             | School of Psychology, University of Sussex                                          |                                                                             |  |  |  |  |  |
| School of Psychology, University of Sussex  |                                                                                                              |                                                                                                                                                                                                                                                                                                                                                                                                  |                                                                                     |                                                                             |  |  |  |  |  |
|                                             |                                                                                                              |                                                                                                                                                                                                                                                                                                                                                                                                  |                                                                                     |                                                                             |  |  |  |  |  |
|                                             |                                                                                                              |                                                                                                                                                                                                                                                                                                                                                                                                  |                                                                                     |                                                                             |  |  |  |  |  |
| 6                                           | Payment for expert testimony                                                                                 | <input checked="" type="checkbox"/> <b>None</b><br><table border="1" style="width: 100%; border-collapse: collapse;"> <tr><td style="height: 20px;"></td><td style="width: 20%;"></td></tr> <tr><td style="height: 20px;"></td><td></td></tr> <tr><td style="height: 20px;"></td><td></td></tr> </table>                                                                                         |                                                                                     |                                                                             |  |  |  |  |  |
|                                             |                                                                                                              |                                                                                                                                                                                                                                                                                                                                                                                                  |                                                                                     |                                                                             |  |  |  |  |  |
|                                             |                                                                                                              |                                                                                                                                                                                                                                                                                                                                                                                                  |                                                                                     |                                                                             |  |  |  |  |  |
|                                             |                                                                                                              |                                                                                                                                                                                                                                                                                                                                                                                                  |                                                                                     |                                                                             |  |  |  |  |  |
| 7                                           | Support for attending meetings and/or travel                                                                 | <input type="checkbox"/> <b>None</b><br><table border="1" style="width: 100%; border-collapse: collapse;"> <tr> <td style="width: 60%;">Alzheimer's Research UK South Coast Network</td> <td>Support for attending Alzheimer's Association International Conference 2022</td> </tr> <tr><td style="height: 20px;"></td><td></td></tr> <tr><td style="height: 20px;"></td><td></td></tr> </table> | Alzheimer's Research UK South Coast Network                                         | Support for attending Alzheimer's Association International Conference 2022 |  |  |  |  |  |
| Alzheimer's Research UK South Coast Network | Support for attending Alzheimer's Association International Conference 2022                                  |                                                                                                                                                                                                                                                                                                                                                                                                  |                                                                                     |                                                                             |  |  |  |  |  |
|                                             |                                                                                                              |                                                                                                                                                                                                                                                                                                                                                                                                  |                                                                                     |                                                                             |  |  |  |  |  |
|                                             |                                                                                                              |                                                                                                                                                                                                                                                                                                                                                                                                  |                                                                                     |                                                                             |  |  |  |  |  |
| 8                                           | Patents planned, issued or pending                                                                           | <input checked="" type="checkbox"/> <b>None</b><br><table border="1" style="width: 100%; border-collapse: collapse;"> <tr><td style="height: 20px;"></td><td style="width: 20%;"></td></tr> <tr><td style="height: 20px;"></td><td></td></tr> <tr><td style="height: 20px;"></td><td></td></tr> </table>                                                                                         |                                                                                     |                                                                             |  |  |  |  |  |
|                                             |                                                                                                              |                                                                                                                                                                                                                                                                                                                                                                                                  |                                                                                     |                                                                             |  |  |  |  |  |
|                                             |                                                                                                              |                                                                                                                                                                                                                                                                                                                                                                                                  |                                                                                     |                                                                             |  |  |  |  |  |
|                                             |                                                                                                              |                                                                                                                                                                                                                                                                                                                                                                                                  |                                                                                     |                                                                             |  |  |  |  |  |
| 9                                           | Participation on a Data Safety Monitoring Board or Advisory Board                                            | <input checked="" type="checkbox"/> <b>None</b><br><table border="1" style="width: 100%; border-collapse: collapse;"> <tr><td style="height: 20px;"></td><td style="width: 20%;"></td></tr> <tr><td style="height: 20px;"></td><td></td></tr> <tr><td style="height: 20px;"></td><td></td></tr> </table>                                                                                         |                                                                                     |                                                                             |  |  |  |  |  |
|                                             |                                                                                                              |                                                                                                                                                                                                                                                                                                                                                                                                  |                                                                                     |                                                                             |  |  |  |  |  |
|                                             |                                                                                                              |                                                                                                                                                                                                                                                                                                                                                                                                  |                                                                                     |                                                                             |  |  |  |  |  |
|                                             |                                                                                                              |                                                                                                                                                                                                                                                                                                                                                                                                  |                                                                                     |                                                                             |  |  |  |  |  |
| 10                                          | Leadership or fiduciary role in other board, society, committee or advocacy group, paid or unpaid            | <input checked="" type="checkbox"/> <b>None</b><br><table border="1" style="width: 100%; border-collapse: collapse;"> <tr><td style="height: 20px;"></td><td style="width: 20%;"></td></tr> <tr><td style="height: 20px;"></td><td></td></tr> <tr><td style="height: 20px;"></td><td></td></tr> </table>                                                                                         |                                                                                     |                                                                             |  |  |  |  |  |
|                                             |                                                                                                              |                                                                                                                                                                                                                                                                                                                                                                                                  |                                                                                     |                                                                             |  |  |  |  |  |
|                                             |                                                                                                              |                                                                                                                                                                                                                                                                                                                                                                                                  |                                                                                     |                                                                             |  |  |  |  |  |
|                                             |                                                                                                              |                                                                                                                                                                                                                                                                                                                                                                                                  |                                                                                     |                                                                             |  |  |  |  |  |

|    | Name all entities with whom you have this relationship or indicate none (add rows as needed) | Specifications/Comments (e.g., if payments were made to you or to your institution)                                                                                                                                                                                                                                  |  |  |  |  |  |  |
|----|----------------------------------------------------------------------------------------------|----------------------------------------------------------------------------------------------------------------------------------------------------------------------------------------------------------------------------------------------------------------------------------------------------------------------|--|--|--|--|--|--|
| 11 | Stock or stock options                                                                       | <input checked="" type="checkbox"/> <b>None</b><br><table border="1" style="width: 100%; border-collapse: collapse;"> <tr><td style="width: 50%; height: 20px;"></td><td style="width: 50%;"></td></tr> <tr><td style="height: 20px;"></td><td></td></tr> <tr><td style="height: 20px;"></td><td></td></tr> </table> |  |  |  |  |  |  |
|    |                                                                                              |                                                                                                                                                                                                                                                                                                                      |  |  |  |  |  |  |
|    |                                                                                              |                                                                                                                                                                                                                                                                                                                      |  |  |  |  |  |  |
|    |                                                                                              |                                                                                                                                                                                                                                                                                                                      |  |  |  |  |  |  |
| 12 | Receipt of equipment, materials, drugs, medical writing, gifts or other services             | <input checked="" type="checkbox"/> <b>None</b><br><table border="1" style="width: 100%; border-collapse: collapse;"> <tr><td style="width: 50%; height: 20px;"></td><td style="width: 50%;"></td></tr> <tr><td style="height: 20px;"></td><td></td></tr> <tr><td style="height: 20px;"></td><td></td></tr> </table> |  |  |  |  |  |  |
|    |                                                                                              |                                                                                                                                                                                                                                                                                                                      |  |  |  |  |  |  |
|    |                                                                                              |                                                                                                                                                                                                                                                                                                                      |  |  |  |  |  |  |
|    |                                                                                              |                                                                                                                                                                                                                                                                                                                      |  |  |  |  |  |  |
| 13 | Other financial or non-financial interests                                                   | <input checked="" type="checkbox"/> <b>None</b><br><table border="1" style="width: 100%; border-collapse: collapse;"> <tr><td style="width: 50%; height: 20px;"></td><td style="width: 50%;"></td></tr> <tr><td style="height: 20px;"></td><td></td></tr> <tr><td style="height: 20px;"></td><td></td></tr> </table> |  |  |  |  |  |  |
|    |                                                                                              |                                                                                                                                                                                                                                                                                                                      |  |  |  |  |  |  |
|    |                                                                                              |                                                                                                                                                                                                                                                                                                                      |  |  |  |  |  |  |
|    |                                                                                              |                                                                                                                                                                                                                                                                                                                      |  |  |  |  |  |  |

**Please place an “X” next to the following statement to indicate your agreement:**

I certify that I have answered every question and have not altered the wording of any of the questions on this form.

## ICMJE DISCLOSURE FORM

**Date:** 3/27/2023

**Your Name:** Christopher Madan

**Manuscript Title:** Artificial Intelligence for Dementia - Applied Models and Digital Health

**Manuscript Number (if known):** [Click or tap here to enter text.](#)

In the interest of transparency, we ask you to disclose all relationships/activities/interests listed below that are related to the content of your manuscript. “Related” means any relation with for-profit or not-for-profit third parties whose interests may be affected by the content of the manuscript. Disclosure represents a commitment to transparency and does not necessarily indicate a bias. If you are in doubt about whether to list a relationship/activity/interest, it is preferable that you do so.

The author’s relationships/activities/interests should be defined broadly. For example, if your manuscript pertains to the epidemiology of hypertension, you should declare all relationships with manufacturers of antihypertensive medication, even if that medication is not mentioned in the manuscript.

In item #1 below, report all support for the work reported in this manuscript without time limit. For all other items, the time frame for disclosure is the past 36 months.

|  | Name all entities with whom you have this relationship or indicate none (add rows as needed) | Specifications/Comments (e.g., if payments were made to you or to your institution) |
|--|----------------------------------------------------------------------------------------------|-------------------------------------------------------------------------------------|
|--|----------------------------------------------------------------------------------------------|-------------------------------------------------------------------------------------|

**Time frame:** Since the initial planning of the work

|                                   |                                                                                                                                                                                | Name all entities with whom you have this relationship or indicate none (add rows as needed)                                                                                                                                                                                                                         | Specifications/Comments (e.g., if payments were made to you or to your institution) |  |  |  |  |  |                                                                                                                                                                                                                                                                                                                                                               |  |  |  |  |  |  |
|-----------------------------------|--------------------------------------------------------------------------------------------------------------------------------------------------------------------------------|----------------------------------------------------------------------------------------------------------------------------------------------------------------------------------------------------------------------------------------------------------------------------------------------------------------------|-------------------------------------------------------------------------------------|--|--|--|--|--|---------------------------------------------------------------------------------------------------------------------------------------------------------------------------------------------------------------------------------------------------------------------------------------------------------------------------------------------------------------|--|--|--|--|--|--|
| <b>1</b>                          | All support for the present manuscript (e.g., funding, provision of study materials, medical writing, article processing charges, etc.)<br><b>No time limit for this item.</b> | <input checked="" type="checkbox"/> <b>None</b><br><table border="1" style="width: 100%; border-collapse: collapse;"> <tr><td style="width: 50%; height: 15px;"></td><td style="width: 50%;"></td></tr> <tr><td style="height: 15px;"></td><td></td></tr> <tr><td style="height: 15px;"></td><td></td></tr> </table> |                                                                                     |  |  |  |  |  | <table border="1" style="width: 100%; border-collapse: collapse;"> <tr><td style="width: 50%; height: 15px;"></td><td style="width: 50%;"></td></tr> <tr><td style="height: 15px;"></td><td></td></tr> <tr><td style="height: 15px;"></td><td></td></tr> </table> <p style="font-size: small; margin-top: 5px;">Click the tab key to add additional rows.</p> |  |  |  |  |  |  |
|                                   |                                                                                                                                                                                |                                                                                                                                                                                                                                                                                                                      |                                                                                     |  |  |  |  |  |                                                                                                                                                                                                                                                                                                                                                               |  |  |  |  |  |  |
|                                   |                                                                                                                                                                                |                                                                                                                                                                                                                                                                                                                      |                                                                                     |  |  |  |  |  |                                                                                                                                                                                                                                                                                                                                                               |  |  |  |  |  |  |
|                                   |                                                                                                                                                                                |                                                                                                                                                                                                                                                                                                                      |                                                                                     |  |  |  |  |  |                                                                                                                                                                                                                                                                                                                                                               |  |  |  |  |  |  |
|                                   |                                                                                                                                                                                |                                                                                                                                                                                                                                                                                                                      |                                                                                     |  |  |  |  |  |                                                                                                                                                                                                                                                                                                                                                               |  |  |  |  |  |  |
|                                   |                                                                                                                                                                                |                                                                                                                                                                                                                                                                                                                      |                                                                                     |  |  |  |  |  |                                                                                                                                                                                                                                                                                                                                                               |  |  |  |  |  |  |
|                                   |                                                                                                                                                                                |                                                                                                                                                                                                                                                                                                                      |                                                                                     |  |  |  |  |  |                                                                                                                                                                                                                                                                                                                                                               |  |  |  |  |  |  |
| <b>Time frame: past 36 months</b> |                                                                                                                                                                                |                                                                                                                                                                                                                                                                                                                      |                                                                                     |  |  |  |  |  |                                                                                                                                                                                                                                                                                                                                                               |  |  |  |  |  |  |
| <b>2</b>                          | Grants or contracts from any entity (if not indicated in item #1 above).                                                                                                       | <input checked="" type="checkbox"/> <b>None</b><br><table border="1" style="width: 100%; border-collapse: collapse;"> <tr><td style="width: 50%; height: 15px;"></td><td style="width: 50%;"></td></tr> <tr><td style="height: 15px;"></td><td></td></tr> <tr><td style="height: 15px;"></td><td></td></tr> </table> |                                                                                     |  |  |  |  |  | <table border="1" style="width: 100%; border-collapse: collapse;"> <tr><td style="width: 50%; height: 15px;"></td><td style="width: 50%;"></td></tr> <tr><td style="height: 15px;"></td><td></td></tr> <tr><td style="height: 15px;"></td><td></td></tr> </table>                                                                                             |  |  |  |  |  |  |
|                                   |                                                                                                                                                                                |                                                                                                                                                                                                                                                                                                                      |                                                                                     |  |  |  |  |  |                                                                                                                                                                                                                                                                                                                                                               |  |  |  |  |  |  |
|                                   |                                                                                                                                                                                |                                                                                                                                                                                                                                                                                                                      |                                                                                     |  |  |  |  |  |                                                                                                                                                                                                                                                                                                                                                               |  |  |  |  |  |  |
|                                   |                                                                                                                                                                                |                                                                                                                                                                                                                                                                                                                      |                                                                                     |  |  |  |  |  |                                                                                                                                                                                                                                                                                                                                                               |  |  |  |  |  |  |
|                                   |                                                                                                                                                                                |                                                                                                                                                                                                                                                                                                                      |                                                                                     |  |  |  |  |  |                                                                                                                                                                                                                                                                                                                                                               |  |  |  |  |  |  |
|                                   |                                                                                                                                                                                |                                                                                                                                                                                                                                                                                                                      |                                                                                     |  |  |  |  |  |                                                                                                                                                                                                                                                                                                                                                               |  |  |  |  |  |  |
|                                   |                                                                                                                                                                                |                                                                                                                                                                                                                                                                                                                      |                                                                                     |  |  |  |  |  |                                                                                                                                                                                                                                                                                                                                                               |  |  |  |  |  |  |
| <b>3</b>                          | Royalties or licenses                                                                                                                                                          | <input checked="" type="checkbox"/> <b>None</b><br><table border="1" style="width: 100%; border-collapse: collapse;"> <tr><td style="width: 50%; height: 15px;"></td><td style="width: 50%;"></td></tr> <tr><td style="height: 15px;"></td><td></td></tr> <tr><td style="height: 15px;"></td><td></td></tr> </table> |                                                                                     |  |  |  |  |  | <table border="1" style="width: 100%; border-collapse: collapse;"> <tr><td style="width: 50%; height: 15px;"></td><td style="width: 50%;"></td></tr> <tr><td style="height: 15px;"></td><td></td></tr> <tr><td style="height: 15px;"></td><td></td></tr> </table>                                                                                             |  |  |  |  |  |  |
|                                   |                                                                                                                                                                                |                                                                                                                                                                                                                                                                                                                      |                                                                                     |  |  |  |  |  |                                                                                                                                                                                                                                                                                                                                                               |  |  |  |  |  |  |
|                                   |                                                                                                                                                                                |                                                                                                                                                                                                                                                                                                                      |                                                                                     |  |  |  |  |  |                                                                                                                                                                                                                                                                                                                                                               |  |  |  |  |  |  |
|                                   |                                                                                                                                                                                |                                                                                                                                                                                                                                                                                                                      |                                                                                     |  |  |  |  |  |                                                                                                                                                                                                                                                                                                                                                               |  |  |  |  |  |  |
|                                   |                                                                                                                                                                                |                                                                                                                                                                                                                                                                                                                      |                                                                                     |  |  |  |  |  |                                                                                                                                                                                                                                                                                                                                                               |  |  |  |  |  |  |
|                                   |                                                                                                                                                                                |                                                                                                                                                                                                                                                                                                                      |                                                                                     |  |  |  |  |  |                                                                                                                                                                                                                                                                                                                                                               |  |  |  |  |  |  |
|                                   |                                                                                                                                                                                |                                                                                                                                                                                                                                                                                                                      |                                                                                     |  |  |  |  |  |                                                                                                                                                                                                                                                                                                                                                               |  |  |  |  |  |  |
| <b>4</b>                          | Consulting fees                                                                                                                                                                | <input checked="" type="checkbox"/> <b>None</b><br><table border="1" style="width: 100%; border-collapse: collapse;"> <tr><td style="width: 50%; height: 15px;"></td><td style="width: 50%;"></td></tr> <tr><td style="height: 15px;"></td><td></td></tr> <tr><td style="height: 15px;"></td><td></td></tr> </table> |                                                                                     |  |  |  |  |  | <table border="1" style="width: 100%; border-collapse: collapse;"> <tr><td style="width: 50%; height: 15px;"></td><td style="width: 50%;"></td></tr> <tr><td style="height: 15px;"></td><td></td></tr> <tr><td style="height: 15px;"></td><td></td></tr> </table>                                                                                             |  |  |  |  |  |  |
|                                   |                                                                                                                                                                                |                                                                                                                                                                                                                                                                                                                      |                                                                                     |  |  |  |  |  |                                                                                                                                                                                                                                                                                                                                                               |  |  |  |  |  |  |
|                                   |                                                                                                                                                                                |                                                                                                                                                                                                                                                                                                                      |                                                                                     |  |  |  |  |  |                                                                                                                                                                                                                                                                                                                                                               |  |  |  |  |  |  |
|                                   |                                                                                                                                                                                |                                                                                                                                                                                                                                                                                                                      |                                                                                     |  |  |  |  |  |                                                                                                                                                                                                                                                                                                                                                               |  |  |  |  |  |  |
|                                   |                                                                                                                                                                                |                                                                                                                                                                                                                                                                                                                      |                                                                                     |  |  |  |  |  |                                                                                                                                                                                                                                                                                                                                                               |  |  |  |  |  |  |
|                                   |                                                                                                                                                                                |                                                                                                                                                                                                                                                                                                                      |                                                                                     |  |  |  |  |  |                                                                                                                                                                                                                                                                                                                                                               |  |  |  |  |  |  |
|                                   |                                                                                                                                                                                |                                                                                                                                                                                                                                                                                                                      |                                                                                     |  |  |  |  |  |                                                                                                                                                                                                                                                                                                                                                               |  |  |  |  |  |  |
| <b>5</b>                          | Payment or honoraria for lectures, presentations, speakers bureaus, manuscript writing or educational events                                                                   | <input checked="" type="checkbox"/> <b>None</b><br><table border="1" style="width: 100%; border-collapse: collapse;"> <tr><td style="width: 50%; height: 15px;"></td><td style="width: 50%;"></td></tr> <tr><td style="height: 15px;"></td><td></td></tr> <tr><td style="height: 15px;"></td><td></td></tr> </table> |                                                                                     |  |  |  |  |  | <table border="1" style="width: 100%; border-collapse: collapse;"> <tr><td style="width: 50%; height: 15px;"></td><td style="width: 50%;"></td></tr> <tr><td style="height: 15px;"></td><td></td></tr> <tr><td style="height: 15px;"></td><td></td></tr> </table>                                                                                             |  |  |  |  |  |  |
|                                   |                                                                                                                                                                                |                                                                                                                                                                                                                                                                                                                      |                                                                                     |  |  |  |  |  |                                                                                                                                                                                                                                                                                                                                                               |  |  |  |  |  |  |
|                                   |                                                                                                                                                                                |                                                                                                                                                                                                                                                                                                                      |                                                                                     |  |  |  |  |  |                                                                                                                                                                                                                                                                                                                                                               |  |  |  |  |  |  |
|                                   |                                                                                                                                                                                |                                                                                                                                                                                                                                                                                                                      |                                                                                     |  |  |  |  |  |                                                                                                                                                                                                                                                                                                                                                               |  |  |  |  |  |  |
|                                   |                                                                                                                                                                                |                                                                                                                                                                                                                                                                                                                      |                                                                                     |  |  |  |  |  |                                                                                                                                                                                                                                                                                                                                                               |  |  |  |  |  |  |
|                                   |                                                                                                                                                                                |                                                                                                                                                                                                                                                                                                                      |                                                                                     |  |  |  |  |  |                                                                                                                                                                                                                                                                                                                                                               |  |  |  |  |  |  |
|                                   |                                                                                                                                                                                |                                                                                                                                                                                                                                                                                                                      |                                                                                     |  |  |  |  |  |                                                                                                                                                                                                                                                                                                                                                               |  |  |  |  |  |  |
| <b>6</b>                          | Payment for expert testimony                                                                                                                                                   | <input checked="" type="checkbox"/> <b>None</b><br><table border="1" style="width: 100%; border-collapse: collapse;"> <tr><td style="width: 50%; height: 15px;"></td><td style="width: 50%;"></td></tr> <tr><td style="height: 15px;"></td><td></td></tr> <tr><td style="height: 15px;"></td><td></td></tr> </table> |                                                                                     |  |  |  |  |  | <table border="1" style="width: 100%; border-collapse: collapse;"> <tr><td style="width: 50%; height: 15px;"></td><td style="width: 50%;"></td></tr> <tr><td style="height: 15px;"></td><td></td></tr> <tr><td style="height: 15px;"></td><td></td></tr> </table>                                                                                             |  |  |  |  |  |  |
|                                   |                                                                                                                                                                                |                                                                                                                                                                                                                                                                                                                      |                                                                                     |  |  |  |  |  |                                                                                                                                                                                                                                                                                                                                                               |  |  |  |  |  |  |
|                                   |                                                                                                                                                                                |                                                                                                                                                                                                                                                                                                                      |                                                                                     |  |  |  |  |  |                                                                                                                                                                                                                                                                                                                                                               |  |  |  |  |  |  |
|                                   |                                                                                                                                                                                |                                                                                                                                                                                                                                                                                                                      |                                                                                     |  |  |  |  |  |                                                                                                                                                                                                                                                                                                                                                               |  |  |  |  |  |  |
|                                   |                                                                                                                                                                                |                                                                                                                                                                                                                                                                                                                      |                                                                                     |  |  |  |  |  |                                                                                                                                                                                                                                                                                                                                                               |  |  |  |  |  |  |
|                                   |                                                                                                                                                                                |                                                                                                                                                                                                                                                                                                                      |                                                                                     |  |  |  |  |  |                                                                                                                                                                                                                                                                                                                                                               |  |  |  |  |  |  |
|                                   |                                                                                                                                                                                |                                                                                                                                                                                                                                                                                                                      |                                                                                     |  |  |  |  |  |                                                                                                                                                                                                                                                                                                                                                               |  |  |  |  |  |  |

|    |                                                                                                   | Name all entities with whom you have this relationship or indicate none (add rows as needed)                                                                                                      | Specifications/Comments (e.g., if payments were made to you or to your institution) |  |  |  |  |  |  |
|----|---------------------------------------------------------------------------------------------------|---------------------------------------------------------------------------------------------------------------------------------------------------------------------------------------------------|-------------------------------------------------------------------------------------|--|--|--|--|--|--|
| 7  | Support for attending meetings and/or travel                                                      | <input checked="" type="checkbox"/> <b>None</b><br><table border="1" data-bbox="347 286 1485 383"> <tr><td></td><td></td></tr> <tr><td></td><td></td></tr> <tr><td></td><td></td></tr> </table>   |                                                                                     |  |  |  |  |  |  |
|    |                                                                                                   |                                                                                                                                                                                                   |                                                                                     |  |  |  |  |  |  |
|    |                                                                                                   |                                                                                                                                                                                                   |                                                                                     |  |  |  |  |  |  |
|    |                                                                                                   |                                                                                                                                                                                                   |                                                                                     |  |  |  |  |  |  |
| 8  | Patents planned, issued or pending                                                                | <input checked="" type="checkbox"/> <b>None</b><br><table border="1" data-bbox="347 506 1485 602"> <tr><td></td><td></td></tr> <tr><td></td><td></td></tr> <tr><td></td><td></td></tr> </table>   |                                                                                     |  |  |  |  |  |  |
|    |                                                                                                   |                                                                                                                                                                                                   |                                                                                     |  |  |  |  |  |  |
|    |                                                                                                   |                                                                                                                                                                                                   |                                                                                     |  |  |  |  |  |  |
|    |                                                                                                   |                                                                                                                                                                                                   |                                                                                     |  |  |  |  |  |  |
| 9  | Participation on a Data Safety Monitoring Board or Advisory Board                                 | <input checked="" type="checkbox"/> <b>None</b><br><table border="1" data-bbox="347 725 1485 822"> <tr><td></td><td></td></tr> <tr><td></td><td></td></tr> <tr><td></td><td></td></tr> </table>   |                                                                                     |  |  |  |  |  |  |
|    |                                                                                                   |                                                                                                                                                                                                   |                                                                                     |  |  |  |  |  |  |
|    |                                                                                                   |                                                                                                                                                                                                   |                                                                                     |  |  |  |  |  |  |
|    |                                                                                                   |                                                                                                                                                                                                   |                                                                                     |  |  |  |  |  |  |
| 10 | Leadership or fiduciary role in other board, society, committee or advocacy group, paid or unpaid | <input checked="" type="checkbox"/> <b>None</b><br><table border="1" data-bbox="347 967 1485 1064"> <tr><td></td><td></td></tr> <tr><td></td><td></td></tr> <tr><td></td><td></td></tr> </table>  |                                                                                     |  |  |  |  |  |  |
|    |                                                                                                   |                                                                                                                                                                                                   |                                                                                     |  |  |  |  |  |  |
|    |                                                                                                   |                                                                                                                                                                                                   |                                                                                     |  |  |  |  |  |  |
|    |                                                                                                   |                                                                                                                                                                                                   |                                                                                     |  |  |  |  |  |  |
| 11 | Stock or stock options                                                                            | <input checked="" type="checkbox"/> <b>None</b><br><table border="1" data-bbox="347 1281 1485 1377"> <tr><td></td><td></td></tr> <tr><td></td><td></td></tr> <tr><td></td><td></td></tr> </table> |                                                                                     |  |  |  |  |  |  |
|    |                                                                                                   |                                                                                                                                                                                                   |                                                                                     |  |  |  |  |  |  |
|    |                                                                                                   |                                                                                                                                                                                                   |                                                                                     |  |  |  |  |  |  |
|    |                                                                                                   |                                                                                                                                                                                                   |                                                                                     |  |  |  |  |  |  |
| 12 | Receipt of equipment, materials, drugs, medical writing, gifts or other services                  | <input checked="" type="checkbox"/> <b>None</b><br><table border="1" data-bbox="347 1500 1485 1597"> <tr><td></td><td></td></tr> <tr><td></td><td></td></tr> <tr><td></td><td></td></tr> </table> |                                                                                     |  |  |  |  |  |  |
|    |                                                                                                   |                                                                                                                                                                                                   |                                                                                     |  |  |  |  |  |  |
|    |                                                                                                   |                                                                                                                                                                                                   |                                                                                     |  |  |  |  |  |  |
|    |                                                                                                   |                                                                                                                                                                                                   |                                                                                     |  |  |  |  |  |  |
| 13 | Other financial or non-financial interests                                                        | <input checked="" type="checkbox"/> <b>None</b><br><table border="1" data-bbox="347 1783 1485 1879"> <tr><td></td><td></td></tr> <tr><td></td><td></td></tr> <tr><td></td><td></td></tr> </table> |                                                                                     |  |  |  |  |  |  |
|    |                                                                                                   |                                                                                                                                                                                                   |                                                                                     |  |  |  |  |  |  |
|    |                                                                                                   |                                                                                                                                                                                                   |                                                                                     |  |  |  |  |  |  |
|    |                                                                                                   |                                                                                                                                                                                                   |                                                                                     |  |  |  |  |  |  |

**Please place an “X” next to the following statement to indicate your agreement:**

I certify that I have answered every question and have not altered the wording of any of the questions on this form.



# ICMJE DISCLOSURE FORM

**Date:** 4/11/2023

**Your Name:** Eric L Harshfield

**Manuscript Title:** Artificial Intelligence for Dementia - Applied Models and Digital Health

**Manuscript Number (if known):** Click or tap here to enter text.

In the interest of transparency, we ask you to disclose all relationships/activities/interests listed below that are related to the content of your manuscript. "Related" means any relation with for-profit or not-for-profit third parties whose interests may be affected by the content of the manuscript. Disclosure represents a commitment to transparency and does not necessarily indicate a bias. If you are in doubt about whether to list a relationship/activity/interest, it is preferable that you do so.

The author's relationships/activities/interests should be defined broadly. For example, if your manuscript pertains to the epidemiology of hypertension, you should declare all relationships with manufacturers of antihypertensive medication, even if that medication is not mentioned in the manuscript.

In item #1 below, report all support for the work reported in this manuscript without time limit. For all other items, the time frame for disclosure is the past 36 months.

|                                                             |                                                                                                                                                                                | Name all entities with whom you have this relationship or indicate none (add rows as needed)                                                                                                                                                                                                       | Specifications/Comments (e.g., if payments were made to you or to your institution) |  |                                      |  |                                                            |  |  |
|-------------------------------------------------------------|--------------------------------------------------------------------------------------------------------------------------------------------------------------------------------|----------------------------------------------------------------------------------------------------------------------------------------------------------------------------------------------------------------------------------------------------------------------------------------------------|-------------------------------------------------------------------------------------|--|--------------------------------------|--|------------------------------------------------------------|--|--|
| <b>Time frame: Since the initial planning of the work</b>   |                                                                                                                                                                                |                                                                                                                                                                                                                                                                                                    |                                                                                     |  |                                      |  |                                                            |  |  |
| <b>1</b>                                                    | All support for the present manuscript (e.g., funding, provision of study materials, medical writing, article processing charges, etc.)<br><b>No time limit for this item.</b> | <input type="checkbox"/> <b>None</b><br><table border="1"> <tr> <td>Cambridge BHF Centre of Research Excellence (RE/18/1/34212)</td> <td></td> </tr> <tr> <td></td> <td></td> </tr> <tr> <td colspan="2" style="text-align: center;">Click the tab key to add additional rows.</td> </tr> </table> | Cambridge BHF Centre of Research Excellence (RE/18/1/34212)                         |  |                                      |  | Click the tab key to add additional rows.                  |  |  |
| Cambridge BHF Centre of Research Excellence (RE/18/1/34212) |                                                                                                                                                                                |                                                                                                                                                                                                                                                                                                    |                                                                                     |  |                                      |  |                                                            |  |  |
|                                                             |                                                                                                                                                                                |                                                                                                                                                                                                                                                                                                    |                                                                                     |  |                                      |  |                                                            |  |  |
| Click the tab key to add additional rows.                   |                                                                                                                                                                                |                                                                                                                                                                                                                                                                                                    |                                                                                     |  |                                      |  |                                                            |  |  |
| <b>Time frame: past 36 months</b>                           |                                                                                                                                                                                |                                                                                                                                                                                                                                                                                                    |                                                                                     |  |                                      |  |                                                            |  |  |
| <b>2</b>                                                    | Grants or contracts from any entity (if not indicated in item #1 above).                                                                                                       | <input type="checkbox"/> <b>None</b><br><table border="1"> <tr> <td>Alzheimer's Society (AS-RF-21-017)</td> <td></td> </tr> <tr> <td>BHF programme grant (RG/F/22/110052)</td> <td></td> </tr> <tr> <td>Cambridge NIHR Biomedical Research Centre (BRC-1215-20014)</td> <td></td> </tr> </table>   | Alzheimer's Society (AS-RF-21-017)                                                  |  | BHF programme grant (RG/F/22/110052) |  | Cambridge NIHR Biomedical Research Centre (BRC-1215-20014) |  |  |
| Alzheimer's Society (AS-RF-21-017)                          |                                                                                                                                                                                |                                                                                                                                                                                                                                                                                                    |                                                                                     |  |                                      |  |                                                            |  |  |
| BHF programme grant (RG/F/22/110052)                        |                                                                                                                                                                                |                                                                                                                                                                                                                                                                                                    |                                                                                     |  |                                      |  |                                                            |  |  |
| Cambridge NIHR Biomedical Research Centre (BRC-1215-20014)  |                                                                                                                                                                                |                                                                                                                                                                                                                                                                                                    |                                                                                     |  |                                      |  |                                                            |  |  |
| <b>3</b>                                                    | Royalties or licenses                                                                                                                                                          | <input checked="" type="checkbox"/> <b>None</b><br><table border="1"> <tr> <td></td> <td></td> </tr> <tr> <td></td> <td></td> </tr> <tr> <td></td> <td></td> </tr> </table>                                                                                                                        |                                                                                     |  |                                      |  |                                                            |  |  |
|                                                             |                                                                                                                                                                                |                                                                                                                                                                                                                                                                                                    |                                                                                     |  |                                      |  |                                                            |  |  |
|                                                             |                                                                                                                                                                                |                                                                                                                                                                                                                                                                                                    |                                                                                     |  |                                      |  |                                                            |  |  |
|                                                             |                                                                                                                                                                                |                                                                                                                                                                                                                                                                                                    |                                                                                     |  |                                      |  |                                                            |  |  |

|    |                                                                                                              | Name all entities with whom you have this relationship or indicate none (add rows as needed)                                                                                                                                                                                                                         | Specifications/Comments (e.g., if payments were made to you or to your institution) |  |  |  |  |  |  |
|----|--------------------------------------------------------------------------------------------------------------|----------------------------------------------------------------------------------------------------------------------------------------------------------------------------------------------------------------------------------------------------------------------------------------------------------------------|-------------------------------------------------------------------------------------|--|--|--|--|--|--|
| 4  | Consulting fees                                                                                              | <input checked="" type="checkbox"/> <b>None</b><br><table border="1" style="width: 100%; border-collapse: collapse;"> <tr><td style="width: 50%; height: 20px;"></td><td style="width: 50%;"></td></tr> <tr><td style="height: 20px;"></td><td></td></tr> <tr><td style="height: 20px;"></td><td></td></tr> </table> |                                                                                     |  |  |  |  |  |  |
|    |                                                                                                              |                                                                                                                                                                                                                                                                                                                      |                                                                                     |  |  |  |  |  |  |
|    |                                                                                                              |                                                                                                                                                                                                                                                                                                                      |                                                                                     |  |  |  |  |  |  |
|    |                                                                                                              |                                                                                                                                                                                                                                                                                                                      |                                                                                     |  |  |  |  |  |  |
| 5  | Payment or honoraria for lectures, presentations, speakers bureaus, manuscript writing or educational events | <input checked="" type="checkbox"/> <b>None</b><br><table border="1" style="width: 100%; border-collapse: collapse;"> <tr><td style="width: 50%; height: 20px;"></td><td style="width: 50%;"></td></tr> <tr><td style="height: 20px;"></td><td></td></tr> <tr><td style="height: 20px;"></td><td></td></tr> </table> |                                                                                     |  |  |  |  |  |  |
|    |                                                                                                              |                                                                                                                                                                                                                                                                                                                      |                                                                                     |  |  |  |  |  |  |
|    |                                                                                                              |                                                                                                                                                                                                                                                                                                                      |                                                                                     |  |  |  |  |  |  |
|    |                                                                                                              |                                                                                                                                                                                                                                                                                                                      |                                                                                     |  |  |  |  |  |  |
| 6  | Payment for expert testimony                                                                                 | <input checked="" type="checkbox"/> <b>None</b><br><table border="1" style="width: 100%; border-collapse: collapse;"> <tr><td style="width: 50%; height: 20px;"></td><td style="width: 50%;"></td></tr> <tr><td style="height: 20px;"></td><td></td></tr> <tr><td style="height: 20px;"></td><td></td></tr> </table> |                                                                                     |  |  |  |  |  |  |
|    |                                                                                                              |                                                                                                                                                                                                                                                                                                                      |                                                                                     |  |  |  |  |  |  |
|    |                                                                                                              |                                                                                                                                                                                                                                                                                                                      |                                                                                     |  |  |  |  |  |  |
|    |                                                                                                              |                                                                                                                                                                                                                                                                                                                      |                                                                                     |  |  |  |  |  |  |
| 7  | Support for attending meetings and/or travel                                                                 | <input checked="" type="checkbox"/> <b>None</b><br><table border="1" style="width: 100%; border-collapse: collapse;"> <tr><td style="width: 50%; height: 20px;"></td><td style="width: 50%;"></td></tr> <tr><td style="height: 20px;"></td><td></td></tr> <tr><td style="height: 20px;"></td><td></td></tr> </table> |                                                                                     |  |  |  |  |  |  |
|    |                                                                                                              |                                                                                                                                                                                                                                                                                                                      |                                                                                     |  |  |  |  |  |  |
|    |                                                                                                              |                                                                                                                                                                                                                                                                                                                      |                                                                                     |  |  |  |  |  |  |
|    |                                                                                                              |                                                                                                                                                                                                                                                                                                                      |                                                                                     |  |  |  |  |  |  |
| 8  | Patents planned, issued or pending                                                                           | <input checked="" type="checkbox"/> <b>None</b><br><table border="1" style="width: 100%; border-collapse: collapse;"> <tr><td style="width: 50%; height: 20px;"></td><td style="width: 50%;"></td></tr> <tr><td style="height: 20px;"></td><td></td></tr> <tr><td style="height: 20px;"></td><td></td></tr> </table> |                                                                                     |  |  |  |  |  |  |
|    |                                                                                                              |                                                                                                                                                                                                                                                                                                                      |                                                                                     |  |  |  |  |  |  |
|    |                                                                                                              |                                                                                                                                                                                                                                                                                                                      |                                                                                     |  |  |  |  |  |  |
|    |                                                                                                              |                                                                                                                                                                                                                                                                                                                      |                                                                                     |  |  |  |  |  |  |
| 9  | Participation on a Data Safety Monitoring Board or Advisory Board                                            | <input checked="" type="checkbox"/> <b>None</b><br><table border="1" style="width: 100%; border-collapse: collapse;"> <tr><td style="width: 50%; height: 20px;"></td><td style="width: 50%;"></td></tr> <tr><td style="height: 20px;"></td><td></td></tr> <tr><td style="height: 20px;"></td><td></td></tr> </table> |                                                                                     |  |  |  |  |  |  |
|    |                                                                                                              |                                                                                                                                                                                                                                                                                                                      |                                                                                     |  |  |  |  |  |  |
|    |                                                                                                              |                                                                                                                                                                                                                                                                                                                      |                                                                                     |  |  |  |  |  |  |
|    |                                                                                                              |                                                                                                                                                                                                                                                                                                                      |                                                                                     |  |  |  |  |  |  |
| 10 | Leadership or fiduciary role in other board, society, committee or advocacy group, paid or unpaid            | <input checked="" type="checkbox"/> <b>None</b><br><table border="1" style="width: 100%; border-collapse: collapse;"> <tr><td style="width: 50%; height: 20px;"></td><td style="width: 50%;"></td></tr> <tr><td style="height: 20px;"></td><td></td></tr> <tr><td style="height: 20px;"></td><td></td></tr> </table> |                                                                                     |  |  |  |  |  |  |
|    |                                                                                                              |                                                                                                                                                                                                                                                                                                                      |                                                                                     |  |  |  |  |  |  |
|    |                                                                                                              |                                                                                                                                                                                                                                                                                                                      |                                                                                     |  |  |  |  |  |  |
|    |                                                                                                              |                                                                                                                                                                                                                                                                                                                      |                                                                                     |  |  |  |  |  |  |

|                                                                                            | Name all entities with whom you have this relationship or indicate none (add rows as needed)                                                                                                    | Specifications/Comments (e.g., if payments were made to you or to your institution) |  |  |  |  |  |  |
|--------------------------------------------------------------------------------------------|-------------------------------------------------------------------------------------------------------------------------------------------------------------------------------------------------|-------------------------------------------------------------------------------------|--|--|--|--|--|--|
| <b>11</b> Stock or stock options                                                           | <input checked="" type="checkbox"/> <b>None</b><br><table border="1" data-bbox="347 286 1484 383"> <tr><td></td><td></td></tr> <tr><td></td><td></td></tr> <tr><td></td><td></td></tr> </table> |                                                                                     |  |  |  |  |  |  |
|                                                                                            |                                                                                                                                                                                                 |                                                                                     |  |  |  |  |  |  |
|                                                                                            |                                                                                                                                                                                                 |                                                                                     |  |  |  |  |  |  |
|                                                                                            |                                                                                                                                                                                                 |                                                                                     |  |  |  |  |  |  |
| <b>12</b> Receipt of equipment, materials, drugs, medical writing, gifts or other services | <input checked="" type="checkbox"/> <b>None</b><br><table border="1" data-bbox="347 506 1484 602"> <tr><td></td><td></td></tr> <tr><td></td><td></td></tr> <tr><td></td><td></td></tr> </table> |                                                                                     |  |  |  |  |  |  |
|                                                                                            |                                                                                                                                                                                                 |                                                                                     |  |  |  |  |  |  |
|                                                                                            |                                                                                                                                                                                                 |                                                                                     |  |  |  |  |  |  |
|                                                                                            |                                                                                                                                                                                                 |                                                                                     |  |  |  |  |  |  |
| <b>13</b> Other financial or non-financial interests                                       | <input checked="" type="checkbox"/> <b>None</b><br><table border="1" data-bbox="347 786 1484 882"> <tr><td></td><td></td></tr> <tr><td></td><td></td></tr> <tr><td></td><td></td></tr> </table> |                                                                                     |  |  |  |  |  |  |
|                                                                                            |                                                                                                                                                                                                 |                                                                                     |  |  |  |  |  |  |
|                                                                                            |                                                                                                                                                                                                 |                                                                                     |  |  |  |  |  |  |
|                                                                                            |                                                                                                                                                                                                 |                                                                                     |  |  |  |  |  |  |

**Please place an “X” next to the following statement to indicate your agreement:**

I certify that I have answered every question and have not altered the wording of any of the questions on this form.

ICMJE DISCLOSURE FORM

Date: 11.4.2023

Your Name: Fanny Petermann-Rocha

Manuscript Title: Artificial Intelligence for Dementia - Applied Models and Digital Health

Manuscript number (if known): \_\_\_\_\_

In the interest of transparency, we ask you to disclose all relationships/activities/interests listed below that are related to the content of your manuscript. "Related" means any relation with for-profit or not-for-profit third parties whose interests may be affected by the content of the manuscript. Disclosure represents a commitment to transparency and does not necessarily indicate a bias. If you are in doubt about whether to list a relationship/activity/interest, it is preferable that you do so.

The following questions apply to the author's relationships/activities/interests as they relate to the current manuscript only.

The author's relationships/activities/interests should be defined broadly. For example, if your manuscript pertains to the epidemiology of hypertension, you should declare all relationships with manufacturers of antihypertensive medication, even if that medication is not mentioned in the manuscript.

For item #1 below, report all support for the work reported in this manuscript without time limit. For all other items, the time frame for disclosure is the past 36 months.

|                                                                                                                                                                                | Name all entities with whom you have this relationship or indicate none (add rows as needed) | Specifications/Comments (e.g., if payments were made to you or to your institution) |
|--------------------------------------------------------------------------------------------------------------------------------------------------------------------------------|----------------------------------------------------------------------------------------------|-------------------------------------------------------------------------------------|
| All support for the present manuscript (e.g., funding, provision of study materials, medical writing, article processing charges, etc.)<br><b>No time limit for this item.</b> | <input checked="" type="checkbox"/> None                                                     |                                                                                     |
|                                                                                                                                                                                |                                                                                              |                                                                                     |
|                                                                                                                                                                                |                                                                                              |                                                                                     |
|                                                                                                                                                                                |                                                                                              |                                                                                     |
|                                                                                                                                                                                |                                                                                              |                                                                                     |
| <b>Time frame: past 36 months</b>                                                                                                                                              |                                                                                              |                                                                                     |
| Grants or contracts from any entity (if not indicated in item #1 above).                                                                                                       | <input checked="" type="checkbox"/> None                                                     |                                                                                     |
|                                                                                                                                                                                |                                                                                              |                                                                                     |
| Royalties or licenses                                                                                                                                                          | <input checked="" type="checkbox"/> None                                                     |                                                                                     |
|                                                                                                                                                                                |                                                                                              |                                                                                     |
| Consulting fees                                                                                                                                                                | <input checked="" type="checkbox"/> None                                                     |                                                                                     |
|                                                                                                                                                                                |                                                                                              |                                                                                     |
| Payment or honoraria for lectures, presentations, speakers bureaus, manuscript writing or educational events                                                                   | <input checked="" type="checkbox"/> None                                                     |                                                                                     |
|                                                                                                                                                                                |                                                                                              |                                                                                     |
| Payment for expert testimony                                                                                                                                                   | <input checked="" type="checkbox"/> None                                                     |                                                                                     |
|                                                                                                                                                                                |                                                                                              |                                                                                     |
| Support for attending meetings and/or travel                                                                                                                                   | <input checked="" type="checkbox"/> None                                                     |                                                                                     |
|                                                                                                                                                                                |                                                                                              |                                                                                     |

|  |                                                                                                   |                               |  |
|--|---------------------------------------------------------------------------------------------------|-------------------------------|--|
|  |                                                                                                   |                               |  |
|  | Patents planned, issued or pending                                                                | <input type="checkbox"/> None |  |
|  |                                                                                                   |                               |  |
|  |                                                                                                   |                               |  |
|  | Participation on a Data Safety Monitoring Board or Advisory Board                                 | <input type="checkbox"/> None |  |
|  |                                                                                                   |                               |  |
|  |                                                                                                   |                               |  |
|  | Leadership or fiduciary role in other board, society, committee or advocacy group, paid or unpaid | <input type="checkbox"/> None |  |
|  |                                                                                                   |                               |  |
|  |                                                                                                   |                               |  |
|  | Stock or stock options                                                                            | <input type="checkbox"/> None |  |
|  |                                                                                                   |                               |  |
|  |                                                                                                   |                               |  |
|  | Receipt of equipment, materials, drugs, medical writing, gifts or other services                  | <input type="checkbox"/> None |  |
|  |                                                                                                   |                               |  |
|  |                                                                                                   |                               |  |
|  | Other financial or non-financial interests                                                        | <input type="checkbox"/> None |  |
|  |                                                                                                   |                               |  |
|  |                                                                                                   |                               |  |

Please place an "X" next to the following statement to indicate your agreement:

I certify that I have answered every question and have not altered the wording of any of the questions on this form.

# ICMJJE DISCLOSURE FORM

**Date:** 4/11/2023

**Your Name:** Matthew H. Iveson

**Manuscript Title:** Artificial Intelligence for Dementia - Applied Models and Digital Health

**Manuscript Number (if known):** Click or tap here to enter text.

In the interest of transparency, we ask you to disclose all relationships/activities/interests listed below that are related to the content of your manuscript. “Related” means any relation with for-profit or not-for-profit third parties whose interests may be affected by the content of the manuscript. Disclosure represents a commitment to transparency and does not necessarily indicate a bias. If you are in doubt about whether to list a relationship/activity/interest, it is preferable that you do so.

The author’s relationships/activities/interests should be defined broadly. For example, if your manuscript pertains to the epidemiology of hypertension, you should declare all relationships with manufacturers of antihypertensive medication, even if that medication is not mentioned in the manuscript.

In item #1 below, report all support for the work reported in this manuscript without time limit. For all other items, the time frame for disclosure is the past 36 months.

|                                                           |                                                                                                                                                                                | Name all entities with whom you have this relationship or indicate none (add rows as needed) | Specifications/Comments (e.g., if payments were made to you or to your institution) |
|-----------------------------------------------------------|--------------------------------------------------------------------------------------------------------------------------------------------------------------------------------|----------------------------------------------------------------------------------------------|-------------------------------------------------------------------------------------|
| <b>Time frame: Since the initial planning of the work</b> |                                                                                                                                                                                |                                                                                              |                                                                                     |
| <b>1</b>                                                  | All support for the present manuscript (e.g., funding, provision of study materials, medical writing, article processing charges, etc.)<br><b>No time limit for this item.</b> | <input checked="" type="checkbox"/> <b>None</b>                                              |                                                                                     |
|                                                           |                                                                                                                                                                                |                                                                                              | Click the tab key to add additional rows.                                           |
| <b>Time frame: past 36 months</b>                         |                                                                                                                                                                                |                                                                                              |                                                                                     |
| <b>2</b>                                                  | Grants or contracts from any entity (if not indicated in item #1 above).                                                                                                       | <input checked="" type="checkbox"/> <b>None</b>                                              |                                                                                     |
|                                                           |                                                                                                                                                                                |                                                                                              |                                                                                     |
| <b>3</b>                                                  | Royalties or licenses                                                                                                                                                          | <input checked="" type="checkbox"/> <b>None</b>                                              |                                                                                     |
|                                                           |                                                                                                                                                                                |                                                                                              |                                                                                     |

|    |                                                                                                              | Name all entities with whom you have this relationship or indicate none (add rows as needed)                                                                                                      | Specifications/Comments (e.g., if payments were made to you or to your institution) |  |  |  |  |  |  |
|----|--------------------------------------------------------------------------------------------------------------|---------------------------------------------------------------------------------------------------------------------------------------------------------------------------------------------------|-------------------------------------------------------------------------------------|--|--|--|--|--|--|
| 4  | Consulting fees                                                                                              | <input checked="" type="checkbox"/> <b>None</b><br><table border="1" data-bbox="347 282 1484 416"> <tr><td></td><td></td></tr> <tr><td></td><td></td></tr> <tr><td></td><td></td></tr> </table>   |                                                                                     |  |  |  |  |  |  |
|    |                                                                                                              |                                                                                                                                                                                                   |                                                                                     |  |  |  |  |  |  |
|    |                                                                                                              |                                                                                                                                                                                                   |                                                                                     |  |  |  |  |  |  |
|    |                                                                                                              |                                                                                                                                                                                                   |                                                                                     |  |  |  |  |  |  |
| 5  | Payment or honoraria for lectures, presentations, speakers bureaus, manuscript writing or educational events | <input checked="" type="checkbox"/> <b>None</b><br><table border="1" data-bbox="347 501 1484 600"> <tr><td></td><td></td></tr> <tr><td></td><td></td></tr> <tr><td></td><td></td></tr> </table>   |                                                                                     |  |  |  |  |  |  |
|    |                                                                                                              |                                                                                                                                                                                                   |                                                                                     |  |  |  |  |  |  |
|    |                                                                                                              |                                                                                                                                                                                                   |                                                                                     |  |  |  |  |  |  |
|    |                                                                                                              |                                                                                                                                                                                                   |                                                                                     |  |  |  |  |  |  |
| 6  | Payment for expert testimony                                                                                 | <input checked="" type="checkbox"/> <b>None</b><br><table border="1" data-bbox="347 848 1484 947"> <tr><td></td><td></td></tr> <tr><td></td><td></td></tr> <tr><td></td><td></td></tr> </table>   |                                                                                     |  |  |  |  |  |  |
|    |                                                                                                              |                                                                                                                                                                                                   |                                                                                     |  |  |  |  |  |  |
|    |                                                                                                              |                                                                                                                                                                                                   |                                                                                     |  |  |  |  |  |  |
|    |                                                                                                              |                                                                                                                                                                                                   |                                                                                     |  |  |  |  |  |  |
| 7  | Support for attending meetings and/or travel                                                                 | <input checked="" type="checkbox"/> <b>None</b><br><table border="1" data-bbox="347 1066 1484 1164"> <tr><td></td><td></td></tr> <tr><td></td><td></td></tr> <tr><td></td><td></td></tr> </table> |                                                                                     |  |  |  |  |  |  |
|    |                                                                                                              |                                                                                                                                                                                                   |                                                                                     |  |  |  |  |  |  |
|    |                                                                                                              |                                                                                                                                                                                                   |                                                                                     |  |  |  |  |  |  |
|    |                                                                                                              |                                                                                                                                                                                                   |                                                                                     |  |  |  |  |  |  |
| 8  | Patents planned, issued or pending                                                                           | <input checked="" type="checkbox"/> <b>None</b><br><table border="1" data-bbox="347 1283 1484 1382"> <tr><td></td><td></td></tr> <tr><td></td><td></td></tr> <tr><td></td><td></td></tr> </table> |                                                                                     |  |  |  |  |  |  |
|    |                                                                                                              |                                                                                                                                                                                                   |                                                                                     |  |  |  |  |  |  |
|    |                                                                                                              |                                                                                                                                                                                                   |                                                                                     |  |  |  |  |  |  |
|    |                                                                                                              |                                                                                                                                                                                                   |                                                                                     |  |  |  |  |  |  |
| 9  | Participation on a Data Safety Monitoring Board or Advisory Board                                            | <input checked="" type="checkbox"/> <b>None</b><br><table border="1" data-bbox="347 1500 1484 1599"> <tr><td></td><td></td></tr> <tr><td></td><td></td></tr> <tr><td></td><td></td></tr> </table> |                                                                                     |  |  |  |  |  |  |
|    |                                                                                                              |                                                                                                                                                                                                   |                                                                                     |  |  |  |  |  |  |
|    |                                                                                                              |                                                                                                                                                                                                   |                                                                                     |  |  |  |  |  |  |
|    |                                                                                                              |                                                                                                                                                                                                   |                                                                                     |  |  |  |  |  |  |
| 10 | Leadership or fiduciary role in other board, society, committee or advocacy group, paid or unpaid            | <input checked="" type="checkbox"/> <b>None</b><br><table border="1" data-bbox="347 1749 1484 1848"> <tr><td></td><td></td></tr> <tr><td></td><td></td></tr> <tr><td></td><td></td></tr> </table> |                                                                                     |  |  |  |  |  |  |
|    |                                                                                                              |                                                                                                                                                                                                   |                                                                                     |  |  |  |  |  |  |
|    |                                                                                                              |                                                                                                                                                                                                   |                                                                                     |  |  |  |  |  |  |
|    |                                                                                                              |                                                                                                                                                                                                   |                                                                                     |  |  |  |  |  |  |

|                                                                                            | Name all entities with whom you have this relationship or indicate none (add rows as needed)                                                                                                          | Specifications/Comments (e.g., if payments were made to you or to your institution) |  |  |  |  |  |  |
|--------------------------------------------------------------------------------------------|-------------------------------------------------------------------------------------------------------------------------------------------------------------------------------------------------------|-------------------------------------------------------------------------------------|--|--|--|--|--|--|
| <b>11</b> Stock or stock options                                                           | <input checked="" type="checkbox"/> <b>None</b><br><table border="1" data-bbox="347 286 1485 383"> <tr><td> </td><td> </td></tr> <tr><td> </td><td> </td></tr> <tr><td> </td><td> </td></tr> </table> |                                                                                     |  |  |  |  |  |  |
|                                                                                            |                                                                                                                                                                                                       |                                                                                     |  |  |  |  |  |  |
|                                                                                            |                                                                                                                                                                                                       |                                                                                     |  |  |  |  |  |  |
|                                                                                            |                                                                                                                                                                                                       |                                                                                     |  |  |  |  |  |  |
| <b>12</b> Receipt of equipment, materials, drugs, medical writing, gifts or other services | <input checked="" type="checkbox"/> <b>None</b><br><table border="1" data-bbox="347 506 1485 602"> <tr><td> </td><td> </td></tr> <tr><td> </td><td> </td></tr> <tr><td> </td><td> </td></tr> </table> |                                                                                     |  |  |  |  |  |  |
|                                                                                            |                                                                                                                                                                                                       |                                                                                     |  |  |  |  |  |  |
|                                                                                            |                                                                                                                                                                                                       |                                                                                     |  |  |  |  |  |  |
|                                                                                            |                                                                                                                                                                                                       |                                                                                     |  |  |  |  |  |  |
| <b>13</b> Other financial or non-financial interests                                       | <input checked="" type="checkbox"/> <b>None</b><br><table border="1" data-bbox="347 786 1485 882"> <tr><td> </td><td> </td></tr> <tr><td> </td><td> </td></tr> <tr><td> </td><td> </td></tr> </table> |                                                                                     |  |  |  |  |  |  |
|                                                                                            |                                                                                                                                                                                                       |                                                                                     |  |  |  |  |  |  |
|                                                                                            |                                                                                                                                                                                                       |                                                                                     |  |  |  |  |  |  |
|                                                                                            |                                                                                                                                                                                                       |                                                                                     |  |  |  |  |  |  |

**Please place an “X” next to the following statement to indicate your agreement:**

I certify that I have answered every question and have not altered the wording of any of the questions on this form.

# ICMJE DISCLOSURE FORM

**Date:** 4/11/2023

**Your Name:** Janice M. Ranson

**Manuscript Title:** Artificial Intelligence for Dementia - Applied Models and Digital Health

**Manuscript Number (if known):** ADJ-D-22-01205

In the interest of transparency, we ask you to disclose all relationships/activities/interests listed below that are related to the content of your manuscript. "Related" means any relation with for-profit or not-for-profit third parties whose interests may be affected by the content of the manuscript. Disclosure represents a commitment to transparency and does not necessarily indicate a bias. If you are in doubt about whether to list a relationship/activity/interest, it is preferable that you do so.

The author's relationships/activities/interests should be defined broadly. For example, if your manuscript pertains to the epidemiology of hypertension, you should declare all relationships with manufacturers of antihypertensive medication, even if that medication is not mentioned in the manuscript.

In item #1 below, report all support for the work reported in this manuscript without time limit. For all other items, the time frame for disclosure is the past 36 months.

|                                                           |                                                                                                                                                                                | Name all entities with whom you have this relationship or indicate none (add rows as needed)                                                                                                                                                                          | Specifications/Comments (e.g., if payments were made to you or to your institution) |         |                       |         |                                           |  |  |
|-----------------------------------------------------------|--------------------------------------------------------------------------------------------------------------------------------------------------------------------------------|-----------------------------------------------------------------------------------------------------------------------------------------------------------------------------------------------------------------------------------------------------------------------|-------------------------------------------------------------------------------------|---------|-----------------------|---------|-------------------------------------------|--|--|
| <b>Time frame: Since the initial planning of the work</b> |                                                                                                                                                                                |                                                                                                                                                                                                                                                                       |                                                                                     |         |                       |         |                                           |  |  |
| <b>1</b>                                                  | All support for the present manuscript (e.g., funding, provision of study materials, medical writing, article processing charges, etc.)<br><b>No time limit for this item.</b> | <input type="checkbox"/> <b>None</b><br><table border="1"> <tr> <td>Alzheimer's Research UK</td> <td>Funding</td> </tr> <tr> <td>Alan Turing Institute</td> <td>Funding</td> </tr> <tr> <td colspan="2">Click the tab key to add additional rows.</td> </tr> </table> | Alzheimer's Research UK                                                             | Funding | Alan Turing Institute | Funding | Click the tab key to add additional rows. |  |  |
| Alzheimer's Research UK                                   | Funding                                                                                                                                                                        |                                                                                                                                                                                                                                                                       |                                                                                     |         |                       |         |                                           |  |  |
| Alan Turing Institute                                     | Funding                                                                                                                                                                        |                                                                                                                                                                                                                                                                       |                                                                                     |         |                       |         |                                           |  |  |
| Click the tab key to add additional rows.                 |                                                                                                                                                                                |                                                                                                                                                                                                                                                                       |                                                                                     |         |                       |         |                                           |  |  |
| <b>Time frame: past 36 months</b>                         |                                                                                                                                                                                |                                                                                                                                                                                                                                                                       |                                                                                     |         |                       |         |                                           |  |  |
| <b>2</b>                                                  | Grants or contracts from any entity (if not indicated in item #1 above).                                                                                                       | <input checked="" type="checkbox"/> <b>None</b><br><table border="1"> <tr><td> </td><td> </td></tr> <tr><td> </td><td> </td></tr> <tr><td> </td><td> </td></tr> </table>                                                                                              |                                                                                     |         |                       |         |                                           |  |  |
|                                                           |                                                                                                                                                                                |                                                                                                                                                                                                                                                                       |                                                                                     |         |                       |         |                                           |  |  |
|                                                           |                                                                                                                                                                                |                                                                                                                                                                                                                                                                       |                                                                                     |         |                       |         |                                           |  |  |
|                                                           |                                                                                                                                                                                |                                                                                                                                                                                                                                                                       |                                                                                     |         |                       |         |                                           |  |  |
| <b>3</b>                                                  | Royalties or licenses                                                                                                                                                          | <input checked="" type="checkbox"/> <b>None</b><br><table border="1"> <tr><td> </td><td> </td></tr> <tr><td> </td><td> </td></tr> <tr><td> </td><td> </td></tr> </table>                                                                                              |                                                                                     |         |                       |         |                                           |  |  |
|                                                           |                                                                                                                                                                                |                                                                                                                                                                                                                                                                       |                                                                                     |         |                       |         |                                           |  |  |
|                                                           |                                                                                                                                                                                |                                                                                                                                                                                                                                                                       |                                                                                     |         |                       |         |                                           |  |  |
|                                                           |                                                                                                                                                                                |                                                                                                                                                                                                                                                                       |                                                                                     |         |                       |         |                                           |  |  |

|                                                            |                                                                                                              | Name all entities with whom you have this relationship or indicate none (add rows as needed)                                                                                                                                                                                                                                                                                                                                                                               | Specifications/Comments (e.g., if payments were made to you or to your institution) |                 |                                                            |            |  |  |  |
|------------------------------------------------------------|--------------------------------------------------------------------------------------------------------------|----------------------------------------------------------------------------------------------------------------------------------------------------------------------------------------------------------------------------------------------------------------------------------------------------------------------------------------------------------------------------------------------------------------------------------------------------------------------------|-------------------------------------------------------------------------------------|-----------------|------------------------------------------------------------|------------|--|--|--|
| 4                                                          | Consulting fees                                                                                              | <input checked="" type="checkbox"/> <b>None</b><br><table border="1" style="width: 100%; border-collapse: collapse;"> <tr><td style="width: 50%; height: 20px;"></td><td style="width: 50%;"></td></tr> <tr><td style="height: 20px;"></td><td></td></tr> <tr><td style="height: 20px;"></td><td></td></tr> </table>                                                                                                                                                       |                                                                                     |                 |                                                            |            |  |  |  |
|                                                            |                                                                                                              |                                                                                                                                                                                                                                                                                                                                                                                                                                                                            |                                                                                     |                 |                                                            |            |  |  |  |
|                                                            |                                                                                                              |                                                                                                                                                                                                                                                                                                                                                                                                                                                                            |                                                                                     |                 |                                                            |            |  |  |  |
|                                                            |                                                                                                              |                                                                                                                                                                                                                                                                                                                                                                                                                                                                            |                                                                                     |                 |                                                            |            |  |  |  |
| 5                                                          | Payment or honoraria for lectures, presentations, speakers bureaus, manuscript writing or educational events | <input checked="" type="checkbox"/> <b>None</b><br><table border="1" style="width: 100%; border-collapse: collapse;"> <tr><td style="width: 50%; height: 20px;"></td><td style="width: 50%;"></td></tr> <tr><td style="height: 20px;"></td><td></td></tr> <tr><td style="height: 20px;"></td><td></td></tr> </table>                                                                                                                                                       |                                                                                     |                 |                                                            |            |  |  |  |
|                                                            |                                                                                                              |                                                                                                                                                                                                                                                                                                                                                                                                                                                                            |                                                                                     |                 |                                                            |            |  |  |  |
|                                                            |                                                                                                              |                                                                                                                                                                                                                                                                                                                                                                                                                                                                            |                                                                                     |                 |                                                            |            |  |  |  |
|                                                            |                                                                                                              |                                                                                                                                                                                                                                                                                                                                                                                                                                                                            |                                                                                     |                 |                                                            |            |  |  |  |
| 6                                                          | Payment for expert testimony                                                                                 | <input checked="" type="checkbox"/> <b>None</b><br><table border="1" style="width: 100%; border-collapse: collapse;"> <tr><td style="width: 50%; height: 20px;"></td><td style="width: 50%;"></td></tr> <tr><td style="height: 20px;"></td><td></td></tr> <tr><td style="height: 20px;"></td><td></td></tr> </table>                                                                                                                                                       |                                                                                     |                 |                                                            |            |  |  |  |
|                                                            |                                                                                                              |                                                                                                                                                                                                                                                                                                                                                                                                                                                                            |                                                                                     |                 |                                                            |            |  |  |  |
|                                                            |                                                                                                              |                                                                                                                                                                                                                                                                                                                                                                                                                                                                            |                                                                                     |                 |                                                            |            |  |  |  |
|                                                            |                                                                                                              |                                                                                                                                                                                                                                                                                                                                                                                                                                                                            |                                                                                     |                 |                                                            |            |  |  |  |
| 7                                                          | Support for attending meetings and/or travel                                                                 | <input checked="" type="checkbox"/> <b>None</b><br><table border="1" style="width: 100%; border-collapse: collapse;"> <tr><td style="width: 50%; height: 20px;"></td><td style="width: 50%;"></td></tr> <tr><td style="height: 20px;"></td><td></td></tr> <tr><td style="height: 20px;"></td><td></td></tr> </table>                                                                                                                                                       |                                                                                     |                 |                                                            |            |  |  |  |
|                                                            |                                                                                                              |                                                                                                                                                                                                                                                                                                                                                                                                                                                                            |                                                                                     |                 |                                                            |            |  |  |  |
|                                                            |                                                                                                              |                                                                                                                                                                                                                                                                                                                                                                                                                                                                            |                                                                                     |                 |                                                            |            |  |  |  |
|                                                            |                                                                                                              |                                                                                                                                                                                                                                                                                                                                                                                                                                                                            |                                                                                     |                 |                                                            |            |  |  |  |
| 8                                                          | Patents planned, issued or pending                                                                           | <input checked="" type="checkbox"/> <b>None</b><br><table border="1" style="width: 100%; border-collapse: collapse;"> <tr><td style="width: 50%; height: 20px;"></td><td style="width: 50%;"></td></tr> <tr><td style="height: 20px;"></td><td></td></tr> <tr><td style="height: 20px;"></td><td></td></tr> </table>                                                                                                                                                       |                                                                                     |                 |                                                            |            |  |  |  |
|                                                            |                                                                                                              |                                                                                                                                                                                                                                                                                                                                                                                                                                                                            |                                                                                     |                 |                                                            |            |  |  |  |
|                                                            |                                                                                                              |                                                                                                                                                                                                                                                                                                                                                                                                                                                                            |                                                                                     |                 |                                                            |            |  |  |  |
|                                                            |                                                                                                              |                                                                                                                                                                                                                                                                                                                                                                                                                                                                            |                                                                                     |                 |                                                            |            |  |  |  |
| 9                                                          | Participation on a Data Safety Monitoring Board or Advisory Board                                            | <input checked="" type="checkbox"/> <b>None</b><br><table border="1" style="width: 100%; border-collapse: collapse;"> <tr><td style="width: 50%; height: 20px;"></td><td style="width: 50%;"></td></tr> <tr><td style="height: 20px;"></td><td></td></tr> <tr><td style="height: 20px;"></td><td></td></tr> </table>                                                                                                                                                       |                                                                                     |                 |                                                            |            |  |  |  |
|                                                            |                                                                                                              |                                                                                                                                                                                                                                                                                                                                                                                                                                                                            |                                                                                     |                 |                                                            |            |  |  |  |
|                                                            |                                                                                                              |                                                                                                                                                                                                                                                                                                                                                                                                                                                                            |                                                                                     |                 |                                                            |            |  |  |  |
|                                                            |                                                                                                              |                                                                                                                                                                                                                                                                                                                                                                                                                                                                            |                                                                                     |                 |                                                            |            |  |  |  |
| 10                                                         | Leadership or fiduciary role in other board, society, committee or advocacy group, paid or unpaid            | <input type="checkbox"/> <b>None</b><br><table border="1" style="width: 100%; border-collapse: collapse;"> <tr> <td style="width: 50%; padding: 2px;">Deep Dementia Phenotyping Network</td> <td style="width: 50%; padding: 2px;">Deputy Director</td> </tr> <tr> <td style="padding: 2px;">Alzheimer's Association ISTAART Professional Interest Area</td> <td style="padding: 2px;">Vice Chair</td> </tr> <tr> <td style="height: 20px;"></td> <td></td> </tr> </table> | Deep Dementia Phenotyping Network                                                   | Deputy Director | Alzheimer's Association ISTAART Professional Interest Area | Vice Chair |  |  |  |
| Deep Dementia Phenotyping Network                          | Deputy Director                                                                                              |                                                                                                                                                                                                                                                                                                                                                                                                                                                                            |                                                                                     |                 |                                                            |            |  |  |  |
| Alzheimer's Association ISTAART Professional Interest Area | Vice Chair                                                                                                   |                                                                                                                                                                                                                                                                                                                                                                                                                                                                            |                                                                                     |                 |                                                            |            |  |  |  |
|                                                            |                                                                                                              |                                                                                                                                                                                                                                                                                                                                                                                                                                                                            |                                                                                     |                 |                                                            |            |  |  |  |

|                                                                                            | Name all entities with whom you have this relationship or indicate none (add rows as needed)                                                                                                    | Specifications/Comments (e.g., if payments were made to you or to your institution) |  |  |  |  |  |  |
|--------------------------------------------------------------------------------------------|-------------------------------------------------------------------------------------------------------------------------------------------------------------------------------------------------|-------------------------------------------------------------------------------------|--|--|--|--|--|--|
| <b>11</b> Stock or stock options                                                           | <input checked="" type="checkbox"/> <b>None</b><br><table border="1" data-bbox="347 286 1485 383"> <tr><td></td><td></td></tr> <tr><td></td><td></td></tr> <tr><td></td><td></td></tr> </table> |                                                                                     |  |  |  |  |  |  |
|                                                                                            |                                                                                                                                                                                                 |                                                                                     |  |  |  |  |  |  |
|                                                                                            |                                                                                                                                                                                                 |                                                                                     |  |  |  |  |  |  |
|                                                                                            |                                                                                                                                                                                                 |                                                                                     |  |  |  |  |  |  |
| <b>12</b> Receipt of equipment, materials, drugs, medical writing, gifts or other services | <input checked="" type="checkbox"/> <b>None</b><br><table border="1" data-bbox="347 506 1485 602"> <tr><td></td><td></td></tr> <tr><td></td><td></td></tr> <tr><td></td><td></td></tr> </table> |                                                                                     |  |  |  |  |  |  |
|                                                                                            |                                                                                                                                                                                                 |                                                                                     |  |  |  |  |  |  |
|                                                                                            |                                                                                                                                                                                                 |                                                                                     |  |  |  |  |  |  |
|                                                                                            |                                                                                                                                                                                                 |                                                                                     |  |  |  |  |  |  |
| <b>13</b> Other financial or non-financial interests                                       | <input checked="" type="checkbox"/> <b>None</b><br><table border="1" data-bbox="347 786 1485 882"> <tr><td></td><td></td></tr> <tr><td></td><td></td></tr> <tr><td></td><td></td></tr> </table> |                                                                                     |  |  |  |  |  |  |
|                                                                                            |                                                                                                                                                                                                 |                                                                                     |  |  |  |  |  |  |
|                                                                                            |                                                                                                                                                                                                 |                                                                                     |  |  |  |  |  |  |
|                                                                                            |                                                                                                                                                                                                 |                                                                                     |  |  |  |  |  |  |

**Please place an “X” next to the following statement to indicate your agreement:**

I certify that I have answered every question and have not altered the wording of any of the questions on this form.

# ICMJJE DISCLOSURE FORM

**Date:** 4/11/2023

**Your Name:** Lokendra Thakur

**Manuscript Title:** Artificial Intelligence for Dementia - Applied Models and Digital Health.

**Manuscript Number (if known):** Click or tap here to enter text.

In the interest of transparency, we ask you to disclose all relationships/activities/interests listed below that are related to the content of your manuscript. “Related” means any relation with for-profit or not-for-profit third parties whose interests may be affected by the content of the manuscript. Disclosure represents a commitment to transparency and does not necessarily indicate a bias. If you are in doubt about whether to list a relationship/activity/interest, it is preferable that you do so.

The author’s relationships/activities/interests should be defined broadly. For example, if your manuscript pertains to the epidemiology of hypertension, you should declare all relationships with manufacturers of antihypertensive medication, even if that medication is not mentioned in the manuscript.

In item #1 below, report all support for the work reported in this manuscript without time limit. For all other items, the time frame for disclosure is the past 36 months.

|                                                           |                                                                                                                                                                                | Name all entities with whom you have this relationship or indicate none (add rows as needed) | Specifications/Comments (e.g., if payments were made to you or to your institution) |
|-----------------------------------------------------------|--------------------------------------------------------------------------------------------------------------------------------------------------------------------------------|----------------------------------------------------------------------------------------------|-------------------------------------------------------------------------------------|
| <b>Time frame: Since the initial planning of the work</b> |                                                                                                                                                                                |                                                                                              |                                                                                     |
| <b>1</b>                                                  | All support for the present manuscript (e.g., funding, provision of study materials, medical writing, article processing charges, etc.)<br><b>No time limit for this item.</b> | <input checked="" type="checkbox"/> <b>None</b>                                              |                                                                                     |
|                                                           |                                                                                                                                                                                |                                                                                              | Click the tab key to add additional rows.                                           |
| <b>Time frame: past 36 months</b>                         |                                                                                                                                                                                |                                                                                              |                                                                                     |
| <b>2</b>                                                  | Grants or contracts from any entity (if not indicated in item #1 above).                                                                                                       | <input checked="" type="checkbox"/> <b>None</b>                                              |                                                                                     |
|                                                           |                                                                                                                                                                                |                                                                                              |                                                                                     |
| <b>3</b>                                                  | Royalties or licenses                                                                                                                                                          | <input checked="" type="checkbox"/> <b>None</b>                                              |                                                                                     |
|                                                           |                                                                                                                                                                                |                                                                                              |                                                                                     |

|    |                                                                                                              | Name all entities with whom you have this relationship or indicate none (add rows as needed)                                                                                                                                                                                                                         | Specifications/Comments (e.g., if payments were made to you or to your institution) |  |  |  |  |  |  |
|----|--------------------------------------------------------------------------------------------------------------|----------------------------------------------------------------------------------------------------------------------------------------------------------------------------------------------------------------------------------------------------------------------------------------------------------------------|-------------------------------------------------------------------------------------|--|--|--|--|--|--|
| 4  | Consulting fees                                                                                              | <input checked="" type="checkbox"/> <b>None</b><br><table border="1" style="width: 100%; border-collapse: collapse;"> <tr><td style="width: 50%; height: 20px;"></td><td style="width: 50%;"></td></tr> <tr><td style="height: 20px;"></td><td></td></tr> <tr><td style="height: 20px;"></td><td></td></tr> </table> |                                                                                     |  |  |  |  |  |  |
|    |                                                                                                              |                                                                                                                                                                                                                                                                                                                      |                                                                                     |  |  |  |  |  |  |
|    |                                                                                                              |                                                                                                                                                                                                                                                                                                                      |                                                                                     |  |  |  |  |  |  |
|    |                                                                                                              |                                                                                                                                                                                                                                                                                                                      |                                                                                     |  |  |  |  |  |  |
| 5  | Payment or honoraria for lectures, presentations, speakers bureaus, manuscript writing or educational events | <input checked="" type="checkbox"/> <b>None</b><br><table border="1" style="width: 100%; border-collapse: collapse;"> <tr><td style="width: 50%; height: 20px;"></td><td style="width: 50%;"></td></tr> <tr><td style="height: 20px;"></td><td></td></tr> <tr><td style="height: 20px;"></td><td></td></tr> </table> |                                                                                     |  |  |  |  |  |  |
|    |                                                                                                              |                                                                                                                                                                                                                                                                                                                      |                                                                                     |  |  |  |  |  |  |
|    |                                                                                                              |                                                                                                                                                                                                                                                                                                                      |                                                                                     |  |  |  |  |  |  |
|    |                                                                                                              |                                                                                                                                                                                                                                                                                                                      |                                                                                     |  |  |  |  |  |  |
| 6  | Payment for expert testimony                                                                                 | <input checked="" type="checkbox"/> <b>None</b><br><table border="1" style="width: 100%; border-collapse: collapse;"> <tr><td style="width: 50%; height: 20px;"></td><td style="width: 50%;"></td></tr> <tr><td style="height: 20px;"></td><td></td></tr> <tr><td style="height: 20px;"></td><td></td></tr> </table> |                                                                                     |  |  |  |  |  |  |
|    |                                                                                                              |                                                                                                                                                                                                                                                                                                                      |                                                                                     |  |  |  |  |  |  |
|    |                                                                                                              |                                                                                                                                                                                                                                                                                                                      |                                                                                     |  |  |  |  |  |  |
|    |                                                                                                              |                                                                                                                                                                                                                                                                                                                      |                                                                                     |  |  |  |  |  |  |
| 7  | Support for attending meetings and/or travel                                                                 | <input checked="" type="checkbox"/> <b>None</b><br><table border="1" style="width: 100%; border-collapse: collapse;"> <tr><td style="width: 50%; height: 20px;"></td><td style="width: 50%;"></td></tr> <tr><td style="height: 20px;"></td><td></td></tr> <tr><td style="height: 20px;"></td><td></td></tr> </table> |                                                                                     |  |  |  |  |  |  |
|    |                                                                                                              |                                                                                                                                                                                                                                                                                                                      |                                                                                     |  |  |  |  |  |  |
|    |                                                                                                              |                                                                                                                                                                                                                                                                                                                      |                                                                                     |  |  |  |  |  |  |
|    |                                                                                                              |                                                                                                                                                                                                                                                                                                                      |                                                                                     |  |  |  |  |  |  |
| 8  | Patents planned, issued or pending                                                                           | <input checked="" type="checkbox"/> <b>None</b><br><table border="1" style="width: 100%; border-collapse: collapse;"> <tr><td style="width: 50%; height: 20px;"></td><td style="width: 50%;"></td></tr> <tr><td style="height: 20px;"></td><td></td></tr> <tr><td style="height: 20px;"></td><td></td></tr> </table> |                                                                                     |  |  |  |  |  |  |
|    |                                                                                                              |                                                                                                                                                                                                                                                                                                                      |                                                                                     |  |  |  |  |  |  |
|    |                                                                                                              |                                                                                                                                                                                                                                                                                                                      |                                                                                     |  |  |  |  |  |  |
|    |                                                                                                              |                                                                                                                                                                                                                                                                                                                      |                                                                                     |  |  |  |  |  |  |
| 9  | Participation on a Data Safety Monitoring Board or Advisory Board                                            | <input checked="" type="checkbox"/> <b>None</b><br><table border="1" style="width: 100%; border-collapse: collapse;"> <tr><td style="width: 50%; height: 20px;"></td><td style="width: 50%;"></td></tr> <tr><td style="height: 20px;"></td><td></td></tr> <tr><td style="height: 20px;"></td><td></td></tr> </table> |                                                                                     |  |  |  |  |  |  |
|    |                                                                                                              |                                                                                                                                                                                                                                                                                                                      |                                                                                     |  |  |  |  |  |  |
|    |                                                                                                              |                                                                                                                                                                                                                                                                                                                      |                                                                                     |  |  |  |  |  |  |
|    |                                                                                                              |                                                                                                                                                                                                                                                                                                                      |                                                                                     |  |  |  |  |  |  |
| 10 | Leadership or fiduciary role in other board, society, committee or advocacy group, paid or unpaid            | <input checked="" type="checkbox"/> <b>None</b><br><table border="1" style="width: 100%; border-collapse: collapse;"> <tr><td style="width: 50%; height: 20px;"></td><td style="width: 50%;"></td></tr> <tr><td style="height: 20px;"></td><td></td></tr> <tr><td style="height: 20px;"></td><td></td></tr> </table> |                                                                                     |  |  |  |  |  |  |
|    |                                                                                                              |                                                                                                                                                                                                                                                                                                                      |                                                                                     |  |  |  |  |  |  |
|    |                                                                                                              |                                                                                                                                                                                                                                                                                                                      |                                                                                     |  |  |  |  |  |  |
|    |                                                                                                              |                                                                                                                                                                                                                                                                                                                      |                                                                                     |  |  |  |  |  |  |

|           |                                                                                  | Name all entities with whom you have this relationship or indicate none (add rows as needed)                                                                                                                                                                                                                         | Specifications/Comments (e.g., if payments were made to you or to your institution) |  |  |  |  |  |  |
|-----------|----------------------------------------------------------------------------------|----------------------------------------------------------------------------------------------------------------------------------------------------------------------------------------------------------------------------------------------------------------------------------------------------------------------|-------------------------------------------------------------------------------------|--|--|--|--|--|--|
| <b>11</b> | Stock or stock options                                                           | <input checked="" type="checkbox"/> <b>None</b><br><table border="1" style="width: 100%; border-collapse: collapse;"> <tr><td style="width: 50%; height: 15px;"></td><td style="width: 50%;"></td></tr> <tr><td style="height: 15px;"></td><td></td></tr> <tr><td style="height: 15px;"></td><td></td></tr> </table> |                                                                                     |  |  |  |  |  |  |
|           |                                                                                  |                                                                                                                                                                                                                                                                                                                      |                                                                                     |  |  |  |  |  |  |
|           |                                                                                  |                                                                                                                                                                                                                                                                                                                      |                                                                                     |  |  |  |  |  |  |
|           |                                                                                  |                                                                                                                                                                                                                                                                                                                      |                                                                                     |  |  |  |  |  |  |
| <b>12</b> | Receipt of equipment, materials, drugs, medical writing, gifts or other services | <input checked="" type="checkbox"/> <b>None</b><br><table border="1" style="width: 100%; border-collapse: collapse;"> <tr><td style="width: 50%; height: 15px;"></td><td style="width: 50%;"></td></tr> <tr><td style="height: 15px;"></td><td></td></tr> <tr><td style="height: 15px;"></td><td></td></tr> </table> |                                                                                     |  |  |  |  |  |  |
|           |                                                                                  |                                                                                                                                                                                                                                                                                                                      |                                                                                     |  |  |  |  |  |  |
|           |                                                                                  |                                                                                                                                                                                                                                                                                                                      |                                                                                     |  |  |  |  |  |  |
|           |                                                                                  |                                                                                                                                                                                                                                                                                                                      |                                                                                     |  |  |  |  |  |  |
| <b>13</b> | Other financial or non-financial interests                                       | <input checked="" type="checkbox"/> <b>None</b><br><table border="1" style="width: 100%; border-collapse: collapse;"> <tr><td style="width: 50%; height: 15px;"></td><td style="width: 50%;"></td></tr> <tr><td style="height: 15px;"></td><td></td></tr> <tr><td style="height: 15px;"></td><td></td></tr> </table> |                                                                                     |  |  |  |  |  |  |
|           |                                                                                  |                                                                                                                                                                                                                                                                                                                      |                                                                                     |  |  |  |  |  |  |
|           |                                                                                  |                                                                                                                                                                                                                                                                                                                      |                                                                                     |  |  |  |  |  |  |
|           |                                                                                  |                                                                                                                                                                                                                                                                                                                      |                                                                                     |  |  |  |  |  |  |

**Please place an "X" next to the following statement to indicate your agreement:**

I certify that I have answered every question and have not altered the wording of any of the questions on this form.

# ICMJE DISCLOSURE FORM

**Date:** 3/24/2023

**Your Name:** Danielle Newby

**Manuscript Title:** Artificial Intelligence for Dementia - Applied Models and Digital Health.

**Manuscript Number (if known):** Click or tap here to enter text.

In the interest of transparency, we ask you to disclose all relationships/activities/interests listed below that are related to the content of your manuscript. “Related” means any relation with for-profit or not-for-profit third parties whose interests may be affected by the content of the manuscript. Disclosure represents a commitment to transparency and does not necessarily indicate a bias. If you are in doubt about whether to list a relationship/activity/interest, it is preferable that you do so.

The author’s relationships/activities/interests should be defined broadly. For example, if your manuscript pertains to the epidemiology of hypertension, you should declare all relationships with manufacturers of antihypertensive medication, even if that medication is not mentioned in the manuscript.

In item #1 below, report all support for the work reported in this manuscript without time limit. For all other items, the time frame for disclosure is the past 36 months.

|                                                           |                                                                                                                                                                                | Name all entities with whom you have this relationship or indicate none (add rows as needed)                                                                                                                                                                                                                    | Specifications/Comments (e.g., if payments were made to you or to your institution) |  |  |  |  |  |                                           |
|-----------------------------------------------------------|--------------------------------------------------------------------------------------------------------------------------------------------------------------------------------|-----------------------------------------------------------------------------------------------------------------------------------------------------------------------------------------------------------------------------------------------------------------------------------------------------------------|-------------------------------------------------------------------------------------|--|--|--|--|--|-------------------------------------------|
| <b>Time frame: Since the initial planning of the work</b> |                                                                                                                                                                                |                                                                                                                                                                                                                                                                                                                 |                                                                                     |  |  |  |  |  |                                           |
| <b>1</b>                                                  | All support for the present manuscript (e.g., funding, provision of study materials, medical writing, article processing charges, etc.)<br><b>No time limit for this item.</b> | <input checked="" type="checkbox"/> <b>None</b><br><table border="1" style="width: 100%; border-collapse: collapse;"> <tr><td style="height: 20px;"> </td><td style="width: 50px;"> </td></tr> <tr><td style="height: 20px;"> </td><td> </td></tr> <tr><td style="height: 20px;"> </td><td> </td></tr> </table> |                                                                                     |  |  |  |  |  | Click the tab key to add additional rows. |
|                                                           |                                                                                                                                                                                |                                                                                                                                                                                                                                                                                                                 |                                                                                     |  |  |  |  |  |                                           |
|                                                           |                                                                                                                                                                                |                                                                                                                                                                                                                                                                                                                 |                                                                                     |  |  |  |  |  |                                           |
|                                                           |                                                                                                                                                                                |                                                                                                                                                                                                                                                                                                                 |                                                                                     |  |  |  |  |  |                                           |
| <b>Time frame: past 36 months</b>                         |                                                                                                                                                                                |                                                                                                                                                                                                                                                                                                                 |                                                                                     |  |  |  |  |  |                                           |
| <b>2</b>                                                  | Grants or contracts from any entity (if not indicated in item #1 above).                                                                                                       | <input checked="" type="checkbox"/> <b>None</b><br><table border="1" style="width: 100%; border-collapse: collapse;"> <tr><td style="height: 20px;"> </td><td style="width: 50px;"> </td></tr> <tr><td style="height: 20px;"> </td><td> </td></tr> <tr><td style="height: 20px;"> </td><td> </td></tr> </table> |                                                                                     |  |  |  |  |  |                                           |
|                                                           |                                                                                                                                                                                |                                                                                                                                                                                                                                                                                                                 |                                                                                     |  |  |  |  |  |                                           |
|                                                           |                                                                                                                                                                                |                                                                                                                                                                                                                                                                                                                 |                                                                                     |  |  |  |  |  |                                           |
|                                                           |                                                                                                                                                                                |                                                                                                                                                                                                                                                                                                                 |                                                                                     |  |  |  |  |  |                                           |
| <b>3</b>                                                  | Royalties or licenses                                                                                                                                                          | <input checked="" type="checkbox"/> <b>None</b><br><table border="1" style="width: 100%; border-collapse: collapse;"> <tr><td style="height: 20px;"> </td><td style="width: 50px;"> </td></tr> <tr><td style="height: 20px;"> </td><td> </td></tr> <tr><td style="height: 20px;"> </td><td> </td></tr> </table> |                                                                                     |  |  |  |  |  |                                           |
|                                                           |                                                                                                                                                                                |                                                                                                                                                                                                                                                                                                                 |                                                                                     |  |  |  |  |  |                                           |
|                                                           |                                                                                                                                                                                |                                                                                                                                                                                                                                                                                                                 |                                                                                     |  |  |  |  |  |                                           |
|                                                           |                                                                                                                                                                                |                                                                                                                                                                                                                                                                                                                 |                                                                                     |  |  |  |  |  |                                           |

|    |                                                                                                              | Name all entities with whom you have this relationship or indicate none (add rows as needed)                                                                                                    | Specifications/Comments (e.g., if payments were made to you or to your institution) |  |  |  |  |  |  |
|----|--------------------------------------------------------------------------------------------------------------|-------------------------------------------------------------------------------------------------------------------------------------------------------------------------------------------------|-------------------------------------------------------------------------------------|--|--|--|--|--|--|
| 4  | Consulting fees                                                                                              | <input checked="" type="checkbox"/> <b>None</b><br><table border="1" data-bbox="347 286 1484 416"> <tr><td></td><td></td></tr> <tr><td></td><td></td></tr> <tr><td></td><td></td></tr> </table> |                                                                                     |  |  |  |  |  |  |
|    |                                                                                                              |                                                                                                                                                                                                 |                                                                                     |  |  |  |  |  |  |
|    |                                                                                                              |                                                                                                                                                                                                 |                                                                                     |  |  |  |  |  |  |
|    |                                                                                                              |                                                                                                                                                                                                 |                                                                                     |  |  |  |  |  |  |
| 5  | Payment or honoraria for lectures, presentations, speakers bureaus, manuscript writing or educational events | <input checked="" type="checkbox"/> <b>None</b><br><table border="1" data-bbox="347 506 1484 600"> <tr><td></td><td></td></tr> <tr><td></td><td></td></tr> </table>                             |                                                                                     |  |  |  |  |  |  |
|    |                                                                                                              |                                                                                                                                                                                                 |                                                                                     |  |  |  |  |  |  |
|    |                                                                                                              |                                                                                                                                                                                                 |                                                                                     |  |  |  |  |  |  |
| 6  | Payment for expert testimony                                                                                 | <input checked="" type="checkbox"/> <b>None</b><br><table border="1" data-bbox="347 853 1484 947"> <tr><td></td><td></td></tr> <tr><td></td><td></td></tr> </table>                             |                                                                                     |  |  |  |  |  |  |
|    |                                                                                                              |                                                                                                                                                                                                 |                                                                                     |  |  |  |  |  |  |
|    |                                                                                                              |                                                                                                                                                                                                 |                                                                                     |  |  |  |  |  |  |
| 7  | Support for attending meetings and/or travel                                                                 | <input checked="" type="checkbox"/> <b>None</b><br><table border="1" data-bbox="347 1072 1484 1167"> <tr><td></td><td></td></tr> <tr><td></td><td></td></tr> </table>                           |                                                                                     |  |  |  |  |  |  |
|    |                                                                                                              |                                                                                                                                                                                                 |                                                                                     |  |  |  |  |  |  |
|    |                                                                                                              |                                                                                                                                                                                                 |                                                                                     |  |  |  |  |  |  |
| 8  | Patents planned, issued or pending                                                                           | <input checked="" type="checkbox"/> <b>None</b><br><table border="1" data-bbox="347 1292 1484 1386"> <tr><td></td><td></td></tr> <tr><td></td><td></td></tr> </table>                           |                                                                                     |  |  |  |  |  |  |
|    |                                                                                                              |                                                                                                                                                                                                 |                                                                                     |  |  |  |  |  |  |
|    |                                                                                                              |                                                                                                                                                                                                 |                                                                                     |  |  |  |  |  |  |
| 9  | Participation on a Data Safety Monitoring Board or Advisory Board                                            | <input checked="" type="checkbox"/> <b>None</b><br><table border="1" data-bbox="347 1512 1484 1606"> <tr><td></td><td></td></tr> <tr><td></td><td></td></tr> </table>                           |                                                                                     |  |  |  |  |  |  |
|    |                                                                                                              |                                                                                                                                                                                                 |                                                                                     |  |  |  |  |  |  |
|    |                                                                                                              |                                                                                                                                                                                                 |                                                                                     |  |  |  |  |  |  |
| 10 | Leadership or fiduciary role in other board, society, committee or advocacy group, paid or unpaid            | <input checked="" type="checkbox"/> <b>None</b><br><table border="1" data-bbox="347 1753 1484 1848"> <tr><td></td><td></td></tr> <tr><td></td><td></td></tr> </table>                           |                                                                                     |  |  |  |  |  |  |
|    |                                                                                                              |                                                                                                                                                                                                 |                                                                                     |  |  |  |  |  |  |
|    |                                                                                                              |                                                                                                                                                                                                 |                                                                                     |  |  |  |  |  |  |

|                                                                                            | Name all entities with whom you have this relationship or indicate none (add rows as needed)                                                                                                          | Specifications/Comments (e.g., if payments were made to you or to your institution) |  |  |  |  |  |  |
|--------------------------------------------------------------------------------------------|-------------------------------------------------------------------------------------------------------------------------------------------------------------------------------------------------------|-------------------------------------------------------------------------------------|--|--|--|--|--|--|
| <b>11</b> Stock or stock options                                                           | <input checked="" type="checkbox"/> <b>None</b><br><table border="1" data-bbox="347 286 1485 383"> <tr><td> </td><td> </td></tr> <tr><td> </td><td> </td></tr> <tr><td> </td><td> </td></tr> </table> |                                                                                     |  |  |  |  |  |  |
|                                                                                            |                                                                                                                                                                                                       |                                                                                     |  |  |  |  |  |  |
|                                                                                            |                                                                                                                                                                                                       |                                                                                     |  |  |  |  |  |  |
|                                                                                            |                                                                                                                                                                                                       |                                                                                     |  |  |  |  |  |  |
| <b>12</b> Receipt of equipment, materials, drugs, medical writing, gifts or other services | <input checked="" type="checkbox"/> <b>None</b><br><table border="1" data-bbox="347 506 1485 602"> <tr><td> </td><td> </td></tr> <tr><td> </td><td> </td></tr> <tr><td> </td><td> </td></tr> </table> |                                                                                     |  |  |  |  |  |  |
|                                                                                            |                                                                                                                                                                                                       |                                                                                     |  |  |  |  |  |  |
|                                                                                            |                                                                                                                                                                                                       |                                                                                     |  |  |  |  |  |  |
|                                                                                            |                                                                                                                                                                                                       |                                                                                     |  |  |  |  |  |  |
| <b>13</b> Other financial or non-financial interests                                       | <input checked="" type="checkbox"/> <b>None</b><br><table border="1" data-bbox="347 786 1485 882"> <tr><td> </td><td> </td></tr> <tr><td> </td><td> </td></tr> <tr><td> </td><td> </td></tr> </table> |                                                                                     |  |  |  |  |  |  |
|                                                                                            |                                                                                                                                                                                                       |                                                                                     |  |  |  |  |  |  |
|                                                                                            |                                                                                                                                                                                                       |                                                                                     |  |  |  |  |  |  |
|                                                                                            |                                                                                                                                                                                                       |                                                                                     |  |  |  |  |  |  |

**Please place an “X” next to the following statement to indicate your agreement:**

I certify that I have answered every question and have not altered the wording of any of the questions on this form.

# ICMJE DISCLOSURE FORM

**Date:** 4/11/2023

**Your Name:** David J Llewellyn

**Manuscript Title:** Artificial Intelligence for Dementia - Applied Models and Digital Health

**Manuscript Number (if known):** ADJ-D-22-01205

In the interest of transparency, we ask you to disclose all relationships/activities/interests listed below that are related to the content of your manuscript. “Related” means any relation with for-profit or not-for-profit third parties whose interests may be affected by the content of the manuscript. Disclosure represents a commitment to transparency and does not necessarily indicate a bias. If you are in doubt about whether to list a relationship/activity/interest, it is preferable that you do so.

The author’s relationships/activities/interests should be defined broadly. For example, if your manuscript pertains to the epidemiology of hypertension, you should declare all relationships with manufacturers of antihypertensive medication, even if that medication is not mentioned in the manuscript.

In item #1 below, report all support for the work reported in this manuscript without time limit. For all other items, the time frame for disclosure is the past 36 months.

|                                                           |                                                                                                                                                                                | Name all entities with whom you have this relationship or indicate none (add rows as needed) | Specifications/Comments (e.g., if payments were made to you or to your institution) |
|-----------------------------------------------------------|--------------------------------------------------------------------------------------------------------------------------------------------------------------------------------|----------------------------------------------------------------------------------------------|-------------------------------------------------------------------------------------|
| <b>Time frame: Since the initial planning of the work</b> |                                                                                                                                                                                |                                                                                              |                                                                                     |
| <b>1</b>                                                  | All support for the present manuscript (e.g., funding, provision of study materials, medical writing, article processing charges, etc.)<br><b>No time limit for this item.</b> | <input type="checkbox"/> <b>None</b>                                                         |                                                                                     |
|                                                           |                                                                                                                                                                                | Alzheimer’s Research UK                                                                      | Funding                                                                             |
|                                                           |                                                                                                                                                                                | Alan Turing Institute/Engineering and Physical Sciences Research Council                     | Funding                                                                             |
|                                                           |                                                                                                                                                                                | Medical Research Council                                                                     | Funding                                                                             |
|                                                           |                                                                                                                                                                                | National Institute for Health Research                                                       | Funding                                                                             |
|                                                           |                                                                                                                                                                                | National Health and Medical Research Council                                                 | Funding                                                                             |
|                                                           |                                                                                                                                                                                | National Institute on Aging/National Institutes of Health                                    | Funding                                                                             |
| <b>Time frame: past 36 months</b>                         |                                                                                                                                                                                |                                                                                              |                                                                                     |
| <b>2</b>                                                  | Grants or contracts from any entity (if not indicated in item #1 above).                                                                                                       | <input checked="" type="checkbox"/> <b>None</b>                                              |                                                                                     |
|                                                           |                                                                                                                                                                                | Biotechnology and Biological Sciences Research Council                                       | Funding                                                                             |
|                                                           |                                                                                                                                                                                | Race Against Dementia                                                                        | Funding                                                                             |
|                                                           |                                                                                                                                                                                | Industrial Strategy Challenge Fund                                                           | Funding                                                                             |
| <b>3</b>                                                  | Royalties or licenses                                                                                                                                                          | <input checked="" type="checkbox"/> <b>None</b>                                              |                                                                                     |
|                                                           |                                                                                                                                                                                |                                                                                              |                                                                                     |
|                                                           |                                                                                                                                                                                |                                                                                              |                                                                                     |

|    |                                                                                                              | Name all entities with whom you have this relationship or indicate none (add rows as needed) | Specifications/Comments (e.g., if payments were made to you or to your institution) |
|----|--------------------------------------------------------------------------------------------------------------|----------------------------------------------------------------------------------------------|-------------------------------------------------------------------------------------|
| 4  | Consulting fees                                                                                              | <input type="checkbox"/> None                                                                |                                                                                     |
|    |                                                                                                              | Alzheimer's Research UK                                                                      | Paid to institution                                                                 |
|    |                                                                                                              |                                                                                              |                                                                                     |
|    |                                                                                                              |                                                                                              |                                                                                     |
| 5  | Payment or honoraria for lectures, presentations, speakers bureaus, manuscript writing or educational events | <input checked="" type="checkbox"/> None                                                     |                                                                                     |
|    |                                                                                                              |                                                                                              |                                                                                     |
|    |                                                                                                              |                                                                                              |                                                                                     |
|    |                                                                                                              |                                                                                              |                                                                                     |
| 6  | Payment for expert testimony                                                                                 | <input checked="" type="checkbox"/> None                                                     |                                                                                     |
|    |                                                                                                              |                                                                                              |                                                                                     |
|    |                                                                                                              |                                                                                              |                                                                                     |
|    |                                                                                                              |                                                                                              |                                                                                     |
| 7  | Support for attending meetings and/or travel                                                                 | <input checked="" type="checkbox"/> None                                                     |                                                                                     |
|    |                                                                                                              |                                                                                              |                                                                                     |
|    |                                                                                                              |                                                                                              |                                                                                     |
|    |                                                                                                              |                                                                                              |                                                                                     |
| 8  | Patents planned, issued or pending                                                                           | <input checked="" type="checkbox"/> None                                                     |                                                                                     |
|    |                                                                                                              |                                                                                              |                                                                                     |
|    |                                                                                                              |                                                                                              |                                                                                     |
|    |                                                                                                              |                                                                                              |                                                                                     |
| 9  | Participation on a Data Safety Monitoring Board or Advisory Board                                            | <input checked="" type="checkbox"/> None                                                     |                                                                                     |
|    |                                                                                                              |                                                                                              |                                                                                     |
|    |                                                                                                              |                                                                                              |                                                                                     |
|    |                                                                                                              |                                                                                              |                                                                                     |
| 10 | Leadership or fiduciary role in other board, society, committee or advocacy group, paid or unpaid            | <input type="checkbox"/> None                                                                |                                                                                     |
|    |                                                                                                              | Deep Dementia Phenotyping Network                                                            | Director                                                                            |
|    |                                                                                                              | Alzheimer's Association ISTAART                                                              | Professional Interest Area Chair and Council Member                                 |
|    |                                                                                                              | Alan Turing Institute                                                                        | Interest Group Organizer                                                            |

|                                                                                            | Name all entities with whom you have this relationship or indicate none (add rows as needed)                                                                                                          | Specifications/Comments (e.g., if payments were made to you or to your institution) |  |  |  |  |  |  |
|--------------------------------------------------------------------------------------------|-------------------------------------------------------------------------------------------------------------------------------------------------------------------------------------------------------|-------------------------------------------------------------------------------------|--|--|--|--|--|--|
| <b>11</b> Stock or stock options                                                           | <input checked="" type="checkbox"/> <b>None</b><br><table border="1" data-bbox="347 286 1487 383"> <tr><td> </td><td> </td></tr> <tr><td> </td><td> </td></tr> <tr><td> </td><td> </td></tr> </table> |                                                                                     |  |  |  |  |  |  |
|                                                                                            |                                                                                                                                                                                                       |                                                                                     |  |  |  |  |  |  |
|                                                                                            |                                                                                                                                                                                                       |                                                                                     |  |  |  |  |  |  |
|                                                                                            |                                                                                                                                                                                                       |                                                                                     |  |  |  |  |  |  |
| <b>12</b> Receipt of equipment, materials, drugs, medical writing, gifts or other services | <input checked="" type="checkbox"/> <b>None</b><br><table border="1" data-bbox="347 506 1487 602"> <tr><td> </td><td> </td></tr> <tr><td> </td><td> </td></tr> <tr><td> </td><td> </td></tr> </table> |                                                                                     |  |  |  |  |  |  |
|                                                                                            |                                                                                                                                                                                                       |                                                                                     |  |  |  |  |  |  |
|                                                                                            |                                                                                                                                                                                                       |                                                                                     |  |  |  |  |  |  |
|                                                                                            |                                                                                                                                                                                                       |                                                                                     |  |  |  |  |  |  |
| <b>13</b> Other financial or non-financial interests                                       | <input checked="" type="checkbox"/> <b>None</b><br><table border="1" data-bbox="347 786 1487 882"> <tr><td> </td><td> </td></tr> <tr><td> </td><td> </td></tr> <tr><td> </td><td> </td></tr> </table> |                                                                                     |  |  |  |  |  |  |
|                                                                                            |                                                                                                                                                                                                       |                                                                                     |  |  |  |  |  |  |
|                                                                                            |                                                                                                                                                                                                       |                                                                                     |  |  |  |  |  |  |
|                                                                                            |                                                                                                                                                                                                       |                                                                                     |  |  |  |  |  |  |

**Please place an “X” next to the following statement to indicate your agreement:**

I certify that I have answered every question and have not altered the wording of any of the questions on this form.



# ICMJE DISCLOSURE FORM

**Date:** 4/12/2023

**Your Name:** Eugene Tang

**Manuscript Title:** Artificial Intelligence for Dementia - Applied Models and Digital Health

**Manuscript Number (if known):** Click or tap here to enter text.

In the interest of transparency, we ask you to disclose all relationships/activities/interests listed below that are related to the content of your manuscript. “Related” means any relation with for-profit or not-for-profit third parties whose interests may be affected by the content of the manuscript. Disclosure represents a commitment to transparency and does not necessarily indicate a bias. If you are in doubt about whether to list a relationship/activity/interest, it is preferable that you do so.

The author’s relationships/activities/interests should be defined broadly. For example, if your manuscript pertains to the epidemiology of hypertension, you should declare all relationships with manufacturers of antihypertensive medication, even if that medication is not mentioned in the manuscript.

In item #1 below, report all support for the work reported in this manuscript without time limit. For all other items, the time frame for disclosure is the past 36 months.

|                                                           |                                                                                                                                                                                | Name all entities with whom you have this relationship or indicate none (add rows as needed) | Specifications/Comments (e.g., if payments were made to you or to your institution) |
|-----------------------------------------------------------|--------------------------------------------------------------------------------------------------------------------------------------------------------------------------------|----------------------------------------------------------------------------------------------|-------------------------------------------------------------------------------------|
| <b>Time frame: Since the initial planning of the work</b> |                                                                                                                                                                                |                                                                                              |                                                                                     |
| <b>1</b>                                                  | All support for the present manuscript (e.g., funding, provision of study materials, medical writing, article processing charges, etc.)<br><b>No time limit for this item.</b> | <input type="checkbox"/> <b>None</b>                                                         |                                                                                     |
|                                                           |                                                                                                                                                                                | NIHR                                                                                         | Funder for salary made to institution                                               |
|                                                           |                                                                                                                                                                                |                                                                                              |                                                                                     |
|                                                           |                                                                                                                                                                                | Click the tab key to add additional rows.                                                    |                                                                                     |
| <b>Time frame: past 36 months</b>                         |                                                                                                                                                                                |                                                                                              |                                                                                     |
| <b>2</b>                                                  | Grants or contracts from any entity (if not indicated in item #1 above).                                                                                                       | <input checked="" type="checkbox"/> <b>None</b>                                              |                                                                                     |
|                                                           |                                                                                                                                                                                |                                                                                              |                                                                                     |
|                                                           |                                                                                                                                                                                |                                                                                              |                                                                                     |
|                                                           |                                                                                                                                                                                |                                                                                              |                                                                                     |
| <b>3</b>                                                  | Royalties or licenses                                                                                                                                                          | <input checked="" type="checkbox"/> <b>None</b>                                              |                                                                                     |
|                                                           |                                                                                                                                                                                |                                                                                              |                                                                                     |
|                                                           |                                                                                                                                                                                |                                                                                              |                                                                                     |
|                                                           |                                                                                                                                                                                |                                                                                              |                                                                                     |

|    |                                                                                                              | Name all entities with whom you have this relationship or indicate none (add rows as needed)                                                                                                                                                                                                                         | Specifications/Comments (e.g., if payments were made to you or to your institution) |  |  |  |  |  |  |
|----|--------------------------------------------------------------------------------------------------------------|----------------------------------------------------------------------------------------------------------------------------------------------------------------------------------------------------------------------------------------------------------------------------------------------------------------------|-------------------------------------------------------------------------------------|--|--|--|--|--|--|
| 4  | Consulting fees                                                                                              | <input checked="" type="checkbox"/> <b>None</b><br><table border="1" style="width: 100%; border-collapse: collapse;"> <tr><td style="width: 50%; height: 20px;"></td><td style="width: 50%;"></td></tr> <tr><td style="height: 20px;"></td><td></td></tr> <tr><td style="height: 20px;"></td><td></td></tr> </table> |                                                                                     |  |  |  |  |  |  |
|    |                                                                                                              |                                                                                                                                                                                                                                                                                                                      |                                                                                     |  |  |  |  |  |  |
|    |                                                                                                              |                                                                                                                                                                                                                                                                                                                      |                                                                                     |  |  |  |  |  |  |
|    |                                                                                                              |                                                                                                                                                                                                                                                                                                                      |                                                                                     |  |  |  |  |  |  |
| 5  | Payment or honoraria for lectures, presentations, speakers bureaus, manuscript writing or educational events | <input checked="" type="checkbox"/> <b>None</b><br><table border="1" style="width: 100%; border-collapse: collapse;"> <tr><td style="width: 50%; height: 20px;"></td><td style="width: 50%;"></td></tr> <tr><td style="height: 20px;"></td><td></td></tr> <tr><td style="height: 20px;"></td><td></td></tr> </table> |                                                                                     |  |  |  |  |  |  |
|    |                                                                                                              |                                                                                                                                                                                                                                                                                                                      |                                                                                     |  |  |  |  |  |  |
|    |                                                                                                              |                                                                                                                                                                                                                                                                                                                      |                                                                                     |  |  |  |  |  |  |
|    |                                                                                                              |                                                                                                                                                                                                                                                                                                                      |                                                                                     |  |  |  |  |  |  |
| 6  | Payment for expert testimony                                                                                 | <input checked="" type="checkbox"/> <b>None</b><br><table border="1" style="width: 100%; border-collapse: collapse;"> <tr><td style="width: 50%; height: 20px;"></td><td style="width: 50%;"></td></tr> <tr><td style="height: 20px;"></td><td></td></tr> <tr><td style="height: 20px;"></td><td></td></tr> </table> |                                                                                     |  |  |  |  |  |  |
|    |                                                                                                              |                                                                                                                                                                                                                                                                                                                      |                                                                                     |  |  |  |  |  |  |
|    |                                                                                                              |                                                                                                                                                                                                                                                                                                                      |                                                                                     |  |  |  |  |  |  |
|    |                                                                                                              |                                                                                                                                                                                                                                                                                                                      |                                                                                     |  |  |  |  |  |  |
| 7  | Support for attending meetings and/or travel                                                                 | <input checked="" type="checkbox"/> <b>None</b><br><table border="1" style="width: 100%; border-collapse: collapse;"> <tr><td style="width: 50%; height: 20px;"></td><td style="width: 50%;"></td></tr> <tr><td style="height: 20px;"></td><td></td></tr> <tr><td style="height: 20px;"></td><td></td></tr> </table> |                                                                                     |  |  |  |  |  |  |
|    |                                                                                                              |                                                                                                                                                                                                                                                                                                                      |                                                                                     |  |  |  |  |  |  |
|    |                                                                                                              |                                                                                                                                                                                                                                                                                                                      |                                                                                     |  |  |  |  |  |  |
|    |                                                                                                              |                                                                                                                                                                                                                                                                                                                      |                                                                                     |  |  |  |  |  |  |
| 8  | Patents planned, issued or pending                                                                           | <input checked="" type="checkbox"/> <b>None</b><br><table border="1" style="width: 100%; border-collapse: collapse;"> <tr><td style="width: 50%; height: 20px;"></td><td style="width: 50%;"></td></tr> <tr><td style="height: 20px;"></td><td></td></tr> <tr><td style="height: 20px;"></td><td></td></tr> </table> |                                                                                     |  |  |  |  |  |  |
|    |                                                                                                              |                                                                                                                                                                                                                                                                                                                      |                                                                                     |  |  |  |  |  |  |
|    |                                                                                                              |                                                                                                                                                                                                                                                                                                                      |                                                                                     |  |  |  |  |  |  |
|    |                                                                                                              |                                                                                                                                                                                                                                                                                                                      |                                                                                     |  |  |  |  |  |  |
| 9  | Participation on a Data Safety Monitoring Board or Advisory Board                                            | <input checked="" type="checkbox"/> <b>None</b><br><table border="1" style="width: 100%; border-collapse: collapse;"> <tr><td style="width: 50%; height: 20px;"></td><td style="width: 50%;"></td></tr> <tr><td style="height: 20px;"></td><td></td></tr> <tr><td style="height: 20px;"></td><td></td></tr> </table> |                                                                                     |  |  |  |  |  |  |
|    |                                                                                                              |                                                                                                                                                                                                                                                                                                                      |                                                                                     |  |  |  |  |  |  |
|    |                                                                                                              |                                                                                                                                                                                                                                                                                                                      |                                                                                     |  |  |  |  |  |  |
|    |                                                                                                              |                                                                                                                                                                                                                                                                                                                      |                                                                                     |  |  |  |  |  |  |
| 10 | Leadership or fiduciary role in other board, society, committee or advocacy group, paid or unpaid            | <input checked="" type="checkbox"/> <b>None</b><br><table border="1" style="width: 100%; border-collapse: collapse;"> <tr><td style="width: 50%; height: 20px;"></td><td style="width: 50%;"></td></tr> <tr><td style="height: 20px;"></td><td></td></tr> <tr><td style="height: 20px;"></td><td></td></tr> </table> |                                                                                     |  |  |  |  |  |  |
|    |                                                                                                              |                                                                                                                                                                                                                                                                                                                      |                                                                                     |  |  |  |  |  |  |
|    |                                                                                                              |                                                                                                                                                                                                                                                                                                                      |                                                                                     |  |  |  |  |  |  |
|    |                                                                                                              |                                                                                                                                                                                                                                                                                                                      |                                                                                     |  |  |  |  |  |  |

|                                                                                            | Name all entities with whom you have this relationship or indicate none (add rows as needed)                                                                                                          | Specifications/Comments (e.g., if payments were made to you or to your institution) |  |  |  |  |  |  |
|--------------------------------------------------------------------------------------------|-------------------------------------------------------------------------------------------------------------------------------------------------------------------------------------------------------|-------------------------------------------------------------------------------------|--|--|--|--|--|--|
| <b>11</b> Stock or stock options                                                           | <input checked="" type="checkbox"/> <b>None</b><br><table border="1" data-bbox="347 286 1485 383"> <tr><td> </td><td> </td></tr> <tr><td> </td><td> </td></tr> <tr><td> </td><td> </td></tr> </table> |                                                                                     |  |  |  |  |  |  |
|                                                                                            |                                                                                                                                                                                                       |                                                                                     |  |  |  |  |  |  |
|                                                                                            |                                                                                                                                                                                                       |                                                                                     |  |  |  |  |  |  |
|                                                                                            |                                                                                                                                                                                                       |                                                                                     |  |  |  |  |  |  |
| <b>12</b> Receipt of equipment, materials, drugs, medical writing, gifts or other services | <input checked="" type="checkbox"/> <b>None</b><br><table border="1" data-bbox="347 506 1485 602"> <tr><td> </td><td> </td></tr> <tr><td> </td><td> </td></tr> <tr><td> </td><td> </td></tr> </table> |                                                                                     |  |  |  |  |  |  |
|                                                                                            |                                                                                                                                                                                                       |                                                                                     |  |  |  |  |  |  |
|                                                                                            |                                                                                                                                                                                                       |                                                                                     |  |  |  |  |  |  |
|                                                                                            |                                                                                                                                                                                                       |                                                                                     |  |  |  |  |  |  |
| <b>13</b> Other financial or non-financial interests                                       | <input checked="" type="checkbox"/> <b>None</b><br><table border="1" data-bbox="347 786 1485 882"> <tr><td> </td><td> </td></tr> <tr><td> </td><td> </td></tr> <tr><td> </td><td> </td></tr> </table> |                                                                                     |  |  |  |  |  |  |
|                                                                                            |                                                                                                                                                                                                       |                                                                                     |  |  |  |  |  |  |
|                                                                                            |                                                                                                                                                                                                       |                                                                                     |  |  |  |  |  |  |
|                                                                                            |                                                                                                                                                                                                       |                                                                                     |  |  |  |  |  |  |

**Please place an “X” next to the following statement to indicate your agreement:**

I certify that I have answered every question and have not altered the wording of any of the questions on this form.

# ICMJJE DISCLOSURE FORM

**Date:** 3/27/2023

**Your Name:** Stefano Tamburin

**Manuscript Title:** Artificial Intelligence for Dementia - Applied Models and Digital Health

**Manuscript Number (if known):** Click or tap here to enter text.

In the interest of transparency, we ask you to disclose all relationships/activities/interests listed below that are related to the content of your manuscript. "Related" means any relation with for-profit or not-for-profit third parties whose interests may be affected by the content of the manuscript. Disclosure represents a commitment to transparency and does not necessarily indicate a bias. If you are in doubt about whether to list a relationship/activity/interest, it is preferable that you do so.

The author's relationships/activities/interests should be defined broadly. For example, if your manuscript pertains to the epidemiology of hypertension, you should declare all relationships with manufacturers of antihypertensive medication, even if that medication is not mentioned in the manuscript.

In item #1 below, report all support for the work reported in this manuscript without time limit. For all other items, the time frame for disclosure is the past 36 months.

|                                                           |                                                                                                                                                                                | Name all entities with whom you have this relationship or indicate none (add rows as needed) | Specifications/Comments (e.g., if payments were made to you or to your institution) |
|-----------------------------------------------------------|--------------------------------------------------------------------------------------------------------------------------------------------------------------------------------|----------------------------------------------------------------------------------------------|-------------------------------------------------------------------------------------|
| <b>Time frame: Since the initial planning of the work</b> |                                                                                                                                                                                |                                                                                              |                                                                                     |
| <b>1</b>                                                  | All support for the present manuscript (e.g., funding, provision of study materials, medical writing, article processing charges, etc.)<br><b>No time limit for this item.</b> | <input checked="" type="checkbox"/> <b>None</b>                                              |                                                                                     |
|                                                           |                                                                                                                                                                                |                                                                                              | Click the tab key to add additional rows.                                           |
| <b>Time frame: past 36 months</b>                         |                                                                                                                                                                                |                                                                                              |                                                                                     |
| <b>2</b>                                                  | Grants or contracts from any entity (if not indicated in item #1 above).                                                                                                       | <input checked="" type="checkbox"/> <b>None</b>                                              |                                                                                     |
|                                                           |                                                                                                                                                                                |                                                                                              |                                                                                     |
| <b>3</b>                                                  | Royalties or licenses                                                                                                                                                          | <input checked="" type="checkbox"/> <b>None</b>                                              |                                                                                     |
|                                                           |                                                                                                                                                                                |                                                                                              |                                                                                     |

|    |                                                                                                              | Name all entities with whom you have this relationship or indicate none (add rows as needed)                                                                                                                                                                                                                         | Specifications/Comments (e.g., if payments were made to you or to your institution) |  |  |  |  |  |  |
|----|--------------------------------------------------------------------------------------------------------------|----------------------------------------------------------------------------------------------------------------------------------------------------------------------------------------------------------------------------------------------------------------------------------------------------------------------|-------------------------------------------------------------------------------------|--|--|--|--|--|--|
| 4  | Consulting fees                                                                                              | <input checked="" type="checkbox"/> <b>None</b><br><table border="1" style="width: 100%; border-collapse: collapse;"> <tr><td style="width: 50%; height: 20px;"></td><td style="width: 50%;"></td></tr> <tr><td style="height: 20px;"></td><td></td></tr> <tr><td style="height: 20px;"></td><td></td></tr> </table> |                                                                                     |  |  |  |  |  |  |
|    |                                                                                                              |                                                                                                                                                                                                                                                                                                                      |                                                                                     |  |  |  |  |  |  |
|    |                                                                                                              |                                                                                                                                                                                                                                                                                                                      |                                                                                     |  |  |  |  |  |  |
|    |                                                                                                              |                                                                                                                                                                                                                                                                                                                      |                                                                                     |  |  |  |  |  |  |
| 5  | Payment or honoraria for lectures, presentations, speakers bureaus, manuscript writing or educational events | <input checked="" type="checkbox"/> <b>None</b><br><table border="1" style="width: 100%; border-collapse: collapse;"> <tr><td style="width: 50%; height: 20px;"></td><td style="width: 50%;"></td></tr> <tr><td style="height: 20px;"></td><td></td></tr> <tr><td style="height: 20px;"></td><td></td></tr> </table> |                                                                                     |  |  |  |  |  |  |
|    |                                                                                                              |                                                                                                                                                                                                                                                                                                                      |                                                                                     |  |  |  |  |  |  |
|    |                                                                                                              |                                                                                                                                                                                                                                                                                                                      |                                                                                     |  |  |  |  |  |  |
|    |                                                                                                              |                                                                                                                                                                                                                                                                                                                      |                                                                                     |  |  |  |  |  |  |
| 6  | Payment for expert testimony                                                                                 | <input checked="" type="checkbox"/> <b>None</b><br><table border="1" style="width: 100%; border-collapse: collapse;"> <tr><td style="width: 50%; height: 20px;"></td><td style="width: 50%;"></td></tr> <tr><td style="height: 20px;"></td><td></td></tr> <tr><td style="height: 20px;"></td><td></td></tr> </table> |                                                                                     |  |  |  |  |  |  |
|    |                                                                                                              |                                                                                                                                                                                                                                                                                                                      |                                                                                     |  |  |  |  |  |  |
|    |                                                                                                              |                                                                                                                                                                                                                                                                                                                      |                                                                                     |  |  |  |  |  |  |
|    |                                                                                                              |                                                                                                                                                                                                                                                                                                                      |                                                                                     |  |  |  |  |  |  |
| 7  | Support for attending meetings and/or travel                                                                 | <input checked="" type="checkbox"/> <b>None</b><br><table border="1" style="width: 100%; border-collapse: collapse;"> <tr><td style="width: 50%; height: 20px;"></td><td style="width: 50%;"></td></tr> <tr><td style="height: 20px;"></td><td></td></tr> <tr><td style="height: 20px;"></td><td></td></tr> </table> |                                                                                     |  |  |  |  |  |  |
|    |                                                                                                              |                                                                                                                                                                                                                                                                                                                      |                                                                                     |  |  |  |  |  |  |
|    |                                                                                                              |                                                                                                                                                                                                                                                                                                                      |                                                                                     |  |  |  |  |  |  |
|    |                                                                                                              |                                                                                                                                                                                                                                                                                                                      |                                                                                     |  |  |  |  |  |  |
| 8  | Patents planned, issued or pending                                                                           | <input checked="" type="checkbox"/> <b>None</b><br><table border="1" style="width: 100%; border-collapse: collapse;"> <tr><td style="width: 50%; height: 20px;"></td><td style="width: 50%;"></td></tr> <tr><td style="height: 20px;"></td><td></td></tr> <tr><td style="height: 20px;"></td><td></td></tr> </table> |                                                                                     |  |  |  |  |  |  |
|    |                                                                                                              |                                                                                                                                                                                                                                                                                                                      |                                                                                     |  |  |  |  |  |  |
|    |                                                                                                              |                                                                                                                                                                                                                                                                                                                      |                                                                                     |  |  |  |  |  |  |
|    |                                                                                                              |                                                                                                                                                                                                                                                                                                                      |                                                                                     |  |  |  |  |  |  |
| 9  | Participation on a Data Safety Monitoring Board or Advisory Board                                            | <input checked="" type="checkbox"/> <b>None</b><br><table border="1" style="width: 100%; border-collapse: collapse;"> <tr><td style="width: 50%; height: 20px;"></td><td style="width: 50%;"></td></tr> <tr><td style="height: 20px;"></td><td></td></tr> <tr><td style="height: 20px;"></td><td></td></tr> </table> |                                                                                     |  |  |  |  |  |  |
|    |                                                                                                              |                                                                                                                                                                                                                                                                                                                      |                                                                                     |  |  |  |  |  |  |
|    |                                                                                                              |                                                                                                                                                                                                                                                                                                                      |                                                                                     |  |  |  |  |  |  |
|    |                                                                                                              |                                                                                                                                                                                                                                                                                                                      |                                                                                     |  |  |  |  |  |  |
| 10 | Leadership or fiduciary role in other board, society, committee or advocacy group, paid or unpaid            | <input checked="" type="checkbox"/> <b>None</b><br><table border="1" style="width: 100%; border-collapse: collapse;"> <tr><td style="width: 50%; height: 20px;"></td><td style="width: 50%;"></td></tr> <tr><td style="height: 20px;"></td><td></td></tr> <tr><td style="height: 20px;"></td><td></td></tr> </table> |                                                                                     |  |  |  |  |  |  |
|    |                                                                                                              |                                                                                                                                                                                                                                                                                                                      |                                                                                     |  |  |  |  |  |  |
|    |                                                                                                              |                                                                                                                                                                                                                                                                                                                      |                                                                                     |  |  |  |  |  |  |
|    |                                                                                                              |                                                                                                                                                                                                                                                                                                                      |                                                                                     |  |  |  |  |  |  |

|                                                                                            | Name all entities with whom you have this relationship or indicate none (add rows as needed)                                                                                                          | Specifications/Comments (e.g., if payments were made to you or to your institution) |  |  |  |  |  |  |
|--------------------------------------------------------------------------------------------|-------------------------------------------------------------------------------------------------------------------------------------------------------------------------------------------------------|-------------------------------------------------------------------------------------|--|--|--|--|--|--|
| <b>11</b> Stock or stock options                                                           | <input checked="" type="checkbox"/> <b>None</b><br><table border="1" data-bbox="349 286 1485 383"> <tr><td> </td><td> </td></tr> <tr><td> </td><td> </td></tr> <tr><td> </td><td> </td></tr> </table> |                                                                                     |  |  |  |  |  |  |
|                                                                                            |                                                                                                                                                                                                       |                                                                                     |  |  |  |  |  |  |
|                                                                                            |                                                                                                                                                                                                       |                                                                                     |  |  |  |  |  |  |
|                                                                                            |                                                                                                                                                                                                       |                                                                                     |  |  |  |  |  |  |
| <b>12</b> Receipt of equipment, materials, drugs, medical writing, gifts or other services | <input checked="" type="checkbox"/> <b>None</b><br><table border="1" data-bbox="349 506 1485 602"> <tr><td> </td><td> </td></tr> <tr><td> </td><td> </td></tr> <tr><td> </td><td> </td></tr> </table> |                                                                                     |  |  |  |  |  |  |
|                                                                                            |                                                                                                                                                                                                       |                                                                                     |  |  |  |  |  |  |
|                                                                                            |                                                                                                                                                                                                       |                                                                                     |  |  |  |  |  |  |
|                                                                                            |                                                                                                                                                                                                       |                                                                                     |  |  |  |  |  |  |
| <b>13</b> Other financial or non-financial interests                                       | <input checked="" type="checkbox"/> <b>None</b><br><table border="1" data-bbox="349 786 1485 882"> <tr><td> </td><td> </td></tr> <tr><td> </td><td> </td></tr> <tr><td> </td><td> </td></tr> </table> |                                                                                     |  |  |  |  |  |  |
|                                                                                            |                                                                                                                                                                                                       |                                                                                     |  |  |  |  |  |  |
|                                                                                            |                                                                                                                                                                                                       |                                                                                     |  |  |  |  |  |  |
|                                                                                            |                                                                                                                                                                                                       |                                                                                     |  |  |  |  |  |  |

**Please place an “X” next to the following statement to indicate your agreement:**

I certify that I have answered every question and have not altered the wording of any of the questions on this form.

# ICMJE DISCLOSURE FORM

**Date:** 4/1/2023

**Your Name:** Jose Sousa

**Manuscript Title:** Artificial Intelligence for Dementia - Applied Models and Digital Health

**Manuscript Number (if known):** Click or tap here to enter text.

In the interest of transparency, we ask you to disclose all relationships/activities/interests listed below that are related to the content of your manuscript. “Related” means any relation with for-profit or not-for-profit third parties whose interests may be affected by the content of the manuscript. Disclosure represents a commitment to transparency and does not necessarily indicate a bias. If you are in doubt about whether to list a relationship/activity/interest, it is preferable that you do so.

The author’s relationships/activities/interests should be defined broadly. For example, if your manuscript pertains to the epidemiology of hypertension, you should declare all relationships with manufacturers of antihypertensive medication, even if that medication is not mentioned in the manuscript.

In item #1 below, report all support for the work reported in this manuscript without time limit. For all other items, the time frame for disclosure is the past 36 months.

|                                                           |                                                                                                                                                                                | Name all entities with whom you have this relationship or indicate none (add rows as needed)                                                                                                                                                    | Specifications/Comments (e.g., if payments were made to you or to your institution) |  |  |  |  |                                           |  |
|-----------------------------------------------------------|--------------------------------------------------------------------------------------------------------------------------------------------------------------------------------|-------------------------------------------------------------------------------------------------------------------------------------------------------------------------------------------------------------------------------------------------|-------------------------------------------------------------------------------------|--|--|--|--|-------------------------------------------|--|
| <b>Time frame: Since the initial planning of the work</b> |                                                                                                                                                                                |                                                                                                                                                                                                                                                 |                                                                                     |  |  |  |  |                                           |  |
| <b>1</b>                                                  | All support for the present manuscript (e.g., funding, provision of study materials, medical writing, article processing charges, etc.)<br><b>No time limit for this item.</b> | <input type="checkbox"/> <b>None</b><br><table border="1"> <tr> <td>Sano-Centre for Computacional Medicine</td> <td></td> </tr> <tr> <td></td> <td></td> </tr> <tr> <td></td> <td>Click the tab key to add additional rows.</td> </tr> </table> | Sano-Centre for Computacional Medicine                                              |  |  |  |  | Click the tab key to add additional rows. |  |
| Sano-Centre for Computacional Medicine                    |                                                                                                                                                                                |                                                                                                                                                                                                                                                 |                                                                                     |  |  |  |  |                                           |  |
|                                                           |                                                                                                                                                                                |                                                                                                                                                                                                                                                 |                                                                                     |  |  |  |  |                                           |  |
|                                                           | Click the tab key to add additional rows.                                                                                                                                      |                                                                                                                                                                                                                                                 |                                                                                     |  |  |  |  |                                           |  |
| <b>Time frame: past 36 months</b>                         |                                                                                                                                                                                |                                                                                                                                                                                                                                                 |                                                                                     |  |  |  |  |                                           |  |
| <b>2</b>                                                  | Grants or contracts from any entity (if not indicated in item #1 above).                                                                                                       | <input checked="" type="checkbox"/> <b>None</b><br><table border="1"> <tr> <td></td> <td></td> </tr> <tr> <td></td> <td></td> </tr> <tr> <td></td> <td></td> </tr> </table>                                                                     |                                                                                     |  |  |  |  |                                           |  |
|                                                           |                                                                                                                                                                                |                                                                                                                                                                                                                                                 |                                                                                     |  |  |  |  |                                           |  |
|                                                           |                                                                                                                                                                                |                                                                                                                                                                                                                                                 |                                                                                     |  |  |  |  |                                           |  |
|                                                           |                                                                                                                                                                                |                                                                                                                                                                                                                                                 |                                                                                     |  |  |  |  |                                           |  |
| <b>3</b>                                                  | Royalties or licenses                                                                                                                                                          | <input checked="" type="checkbox"/> <b>None</b><br><table border="1"> <tr> <td></td> <td></td> </tr> <tr> <td></td> <td></td> </tr> <tr> <td></td> <td></td> </tr> </table>                                                                     |                                                                                     |  |  |  |  |                                           |  |
|                                                           |                                                                                                                                                                                |                                                                                                                                                                                                                                                 |                                                                                     |  |  |  |  |                                           |  |
|                                                           |                                                                                                                                                                                |                                                                                                                                                                                                                                                 |                                                                                     |  |  |  |  |                                           |  |
|                                                           |                                                                                                                                                                                |                                                                                                                                                                                                                                                 |                                                                                     |  |  |  |  |                                           |  |

|    |                                                                                                              | Name all entities with whom you have this relationship or indicate none (add rows as needed)                                                                                                      | Specifications/Comments (e.g., if payments were made to you or to your institution) |  |  |  |  |  |  |
|----|--------------------------------------------------------------------------------------------------------------|---------------------------------------------------------------------------------------------------------------------------------------------------------------------------------------------------|-------------------------------------------------------------------------------------|--|--|--|--|--|--|
| 4  | Consulting fees                                                                                              | <input checked="" type="checkbox"/> <b>None</b><br><table border="1" data-bbox="347 286 1484 416"> <tr><td></td><td></td></tr> <tr><td></td><td></td></tr> <tr><td></td><td></td></tr> </table>   |                                                                                     |  |  |  |  |  |  |
|    |                                                                                                              |                                                                                                                                                                                                   |                                                                                     |  |  |  |  |  |  |
|    |                                                                                                              |                                                                                                                                                                                                   |                                                                                     |  |  |  |  |  |  |
|    |                                                                                                              |                                                                                                                                                                                                   |                                                                                     |  |  |  |  |  |  |
| 5  | Payment or honoraria for lectures, presentations, speakers bureaus, manuscript writing or educational events | <input checked="" type="checkbox"/> <b>None</b><br><table border="1" data-bbox="347 506 1484 600"> <tr><td></td><td></td></tr> <tr><td></td><td></td></tr> <tr><td></td><td></td></tr> </table>   |                                                                                     |  |  |  |  |  |  |
|    |                                                                                                              |                                                                                                                                                                                                   |                                                                                     |  |  |  |  |  |  |
|    |                                                                                                              |                                                                                                                                                                                                   |                                                                                     |  |  |  |  |  |  |
|    |                                                                                                              |                                                                                                                                                                                                   |                                                                                     |  |  |  |  |  |  |
| 6  | Payment for expert testimony                                                                                 | <input checked="" type="checkbox"/> <b>None</b><br><table border="1" data-bbox="347 853 1484 947"> <tr><td></td><td></td></tr> <tr><td></td><td></td></tr> <tr><td></td><td></td></tr> </table>   |                                                                                     |  |  |  |  |  |  |
|    |                                                                                                              |                                                                                                                                                                                                   |                                                                                     |  |  |  |  |  |  |
|    |                                                                                                              |                                                                                                                                                                                                   |                                                                                     |  |  |  |  |  |  |
|    |                                                                                                              |                                                                                                                                                                                                   |                                                                                     |  |  |  |  |  |  |
| 7  | Support for attending meetings and/or travel                                                                 | <input checked="" type="checkbox"/> <b>None</b><br><table border="1" data-bbox="347 1072 1484 1167"> <tr><td></td><td></td></tr> <tr><td></td><td></td></tr> <tr><td></td><td></td></tr> </table> |                                                                                     |  |  |  |  |  |  |
|    |                                                                                                              |                                                                                                                                                                                                   |                                                                                     |  |  |  |  |  |  |
|    |                                                                                                              |                                                                                                                                                                                                   |                                                                                     |  |  |  |  |  |  |
|    |                                                                                                              |                                                                                                                                                                                                   |                                                                                     |  |  |  |  |  |  |
| 8  | Patents planned, issued or pending                                                                           | <input checked="" type="checkbox"/> <b>None</b><br><table border="1" data-bbox="347 1292 1484 1386"> <tr><td></td><td></td></tr> <tr><td></td><td></td></tr> <tr><td></td><td></td></tr> </table> |                                                                                     |  |  |  |  |  |  |
|    |                                                                                                              |                                                                                                                                                                                                   |                                                                                     |  |  |  |  |  |  |
|    |                                                                                                              |                                                                                                                                                                                                   |                                                                                     |  |  |  |  |  |  |
|    |                                                                                                              |                                                                                                                                                                                                   |                                                                                     |  |  |  |  |  |  |
| 9  | Participation on a Data Safety Monitoring Board or Advisory Board                                            | <input checked="" type="checkbox"/> <b>None</b><br><table border="1" data-bbox="347 1512 1484 1606"> <tr><td></td><td></td></tr> <tr><td></td><td></td></tr> <tr><td></td><td></td></tr> </table> |                                                                                     |  |  |  |  |  |  |
|    |                                                                                                              |                                                                                                                                                                                                   |                                                                                     |  |  |  |  |  |  |
|    |                                                                                                              |                                                                                                                                                                                                   |                                                                                     |  |  |  |  |  |  |
|    |                                                                                                              |                                                                                                                                                                                                   |                                                                                     |  |  |  |  |  |  |
| 10 | Leadership or fiduciary role in other board, society, committee or advocacy group, paid or unpaid            | <input checked="" type="checkbox"/> <b>None</b><br><table border="1" data-bbox="347 1753 1484 1848"> <tr><td></td><td></td></tr> <tr><td></td><td></td></tr> <tr><td></td><td></td></tr> </table> |                                                                                     |  |  |  |  |  |  |
|    |                                                                                                              |                                                                                                                                                                                                   |                                                                                     |  |  |  |  |  |  |
|    |                                                                                                              |                                                                                                                                                                                                   |                                                                                     |  |  |  |  |  |  |
|    |                                                                                                              |                                                                                                                                                                                                   |                                                                                     |  |  |  |  |  |  |

|    |                                                                                  | Name all entities with whom you have this relationship or indicate none (add rows as needed)                                                                                                                                                                                                                         | Specifications/Comments (e.g., if payments were made to you or to your institution) |  |  |  |  |  |  |
|----|----------------------------------------------------------------------------------|----------------------------------------------------------------------------------------------------------------------------------------------------------------------------------------------------------------------------------------------------------------------------------------------------------------------|-------------------------------------------------------------------------------------|--|--|--|--|--|--|
| 11 | Stock or stock options                                                           | <input checked="" type="checkbox"/> <b>None</b><br><table border="1" style="width: 100%; border-collapse: collapse;"> <tr><td style="width: 50%; height: 20px;"></td><td style="width: 50%;"></td></tr> <tr><td style="height: 20px;"></td><td></td></tr> <tr><td style="height: 20px;"></td><td></td></tr> </table> |                                                                                     |  |  |  |  |  |  |
|    |                                                                                  |                                                                                                                                                                                                                                                                                                                      |                                                                                     |  |  |  |  |  |  |
|    |                                                                                  |                                                                                                                                                                                                                                                                                                                      |                                                                                     |  |  |  |  |  |  |
|    |                                                                                  |                                                                                                                                                                                                                                                                                                                      |                                                                                     |  |  |  |  |  |  |
| 12 | Receipt of equipment, materials, drugs, medical writing, gifts or other services | <input checked="" type="checkbox"/> <b>None</b><br><table border="1" style="width: 100%; border-collapse: collapse;"> <tr><td style="width: 50%; height: 20px;"></td><td style="width: 50%;"></td></tr> <tr><td style="height: 20px;"></td><td></td></tr> <tr><td style="height: 20px;"></td><td></td></tr> </table> |                                                                                     |  |  |  |  |  |  |
|    |                                                                                  |                                                                                                                                                                                                                                                                                                                      |                                                                                     |  |  |  |  |  |  |
|    |                                                                                  |                                                                                                                                                                                                                                                                                                                      |                                                                                     |  |  |  |  |  |  |
|    |                                                                                  |                                                                                                                                                                                                                                                                                                                      |                                                                                     |  |  |  |  |  |  |
| 13 | Other financial or non-financial interests                                       | <input checked="" type="checkbox"/> <b>None</b><br><table border="1" style="width: 100%; border-collapse: collapse;"> <tr><td style="width: 50%; height: 20px;"></td><td style="width: 50%;"></td></tr> <tr><td style="height: 20px;"></td><td></td></tr> <tr><td style="height: 20px;"></td><td></td></tr> </table> |                                                                                     |  |  |  |  |  |  |
|    |                                                                                  |                                                                                                                                                                                                                                                                                                                      |                                                                                     |  |  |  |  |  |  |
|    |                                                                                  |                                                                                                                                                                                                                                                                                                                      |                                                                                     |  |  |  |  |  |  |
|    |                                                                                  |                                                                                                                                                                                                                                                                                                                      |                                                                                     |  |  |  |  |  |  |

**Please place an “X” next to the following statement to indicate your agreement:**

I certify that I have answered every question and have not altered the wording of any of the questions on this form.
